# Supplementary material for: Synthesis of α-trifluoromethyl sulfides through fluorosulfuration ofgem-difluoroalkenes
Source: Royal Society of Chemistry journal article supplement (doi:10.1039/d2qo00391k), 2022-01-01
Supplement: d2qo00391k1.pdf [file d2qo00391k1.pdf]

# Supporting Information

## Synthesis of $\alpha$ -Trifluoromethyl Sulfides through Fluorosulfuration of **gem-Difluoroalkenes**

Tingting Song,<sup>a</sup> Chen-Ho Tung<sup>a</sup> and Zhenghu Xu<sup>\*a,b</sup>

### CONTENT:

|                                                                                   |     |
|-----------------------------------------------------------------------------------|-----|
| 1. General Information.....                                                       | S2  |
| 2. Synthesis of the Starting Materials.....                                       | S2  |
| 3. General Procedure for the Synthesis of $\alpha$ -Trifluoromethyl Sulfides..... | S3  |
| 4. Gram-scale Experiment.....                                                     | S3  |
| 5. Synthetic application of $\alpha$ -Trifluoromethyl Sulfides.....               | S4  |
| 6. X-ray Crystallography.....                                                     | S5  |
| 7. Characterization Data.....                                                     | S6  |
| 8. Supplementary Spectra.....                                                     | S20 |
| 9. References.....                                                                | S78 |

## 1. General Information

All the reagents and solvents were purchased from commercial sources and used without further purification. All reactions were monitored by using TLC. Column chromatography was performed with silica gel (100-200 mesh) as the stationary phase. All NMR spectra were recorded on Bruker-400 MHz spectrometer and Bruker-500 MHz spectrometer. Chemical shifts are reported relative to the residual signals of tetramethylsilane in  $\text{CDCl}_3$   $^1\text{H}$  and  $^{13}\text{C}$  NMR spectroscopy. Multiplicities are reported as follows: singlet (s), doublet (d), doublet of doublets (dd), doublet of triplets (dt), triplet (t), quartet (q), multiplet (m). HRMS were measured on the Bruker-impact II and Agilent-Q-TOF6510 instruments.

## 2. Synthesis of the Starting Materials.

1) General Procedure for the Synthesis of gem-Difluoroalkenes.

The known gem-Difluoroalkenes were prepared according to the literatures, and all the spectra data are in agreement with the reports.<sup>1</sup>

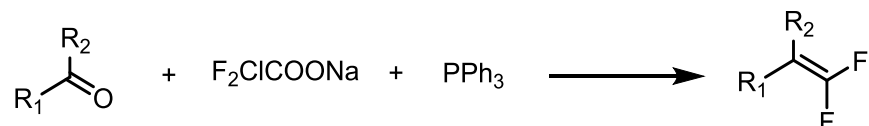

2) Typical procedure for the preparation of benzenesulfonothioate.<sup>2, 3, 4</sup>

## 3. General Procedure for the $\alpha$ -Trifluoromethyl Sulfides.

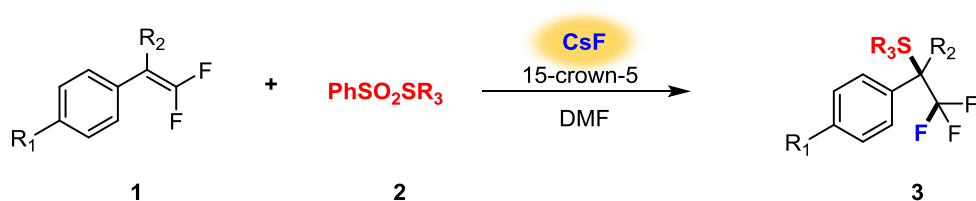

### Condition A:

General Procedure for the Synthesis of **3a-3c**, **3f**, **4a-4c**, **4e**.

A mixture of **1** (0.15 mmol), **2** (2 equiv), CsF (3 equiv) and 15-crown-5 (1 equiv) in DMF (1.5 mL) under  $\text{N}_2$  atmosphere was stirred at  $60^\circ\text{C}$  for 2 h. The reaction mixture was filtered on celite and evaporated under reduced pressure, and purified by

column chromatography to give the desired product.

#### General Procedure for the Synthesis of **3g-3r, 4d**.

A mixture of **1** (0.15 mmol), **2** (2 equiv), CsF (3 equiv) and 15-crown-5 (1 equiv) in DMF (1.5 mL) under N<sub>2</sub> atmosphere was stirred at 60 °C for 4h. The reaction mixture was filtered on celite and evaporated under reduced pressure, and purified by column chromatography to give the desired product .

#### General Procedure for the Synthesis of **3d-3e, 4f-4h**.

A mixture of **1** (0.15 mmol), **2** (4 equiv), CsF (4 equiv) and 15-crown-5 (1 equiv) in DMF (1.5 mL) under N<sub>2</sub> atmosphere was stirred at 45 °C. After the reaction was completed (determined by TLC analysis), the reaction mixture was filtered on celite and evaporated under reduced pressure, and purified by column chromatography to give the desired product.

#### Condition B:

#### General Procedure for the Synthesis of **3a-3c, 4a-4c**.

A mixture of **1** (0.15 mmol), **2** (2 equiv), and CsF (2 equiv) in DMF (1.5 mL) under N<sub>2</sub> atmosphere was stirred at 50 °C for 10 h. The reaction mixture was filtered on celite and evaporated under reduced pressure, and purified by column chromatography to give the desired product.

## 4. Gram-scale Reactions.

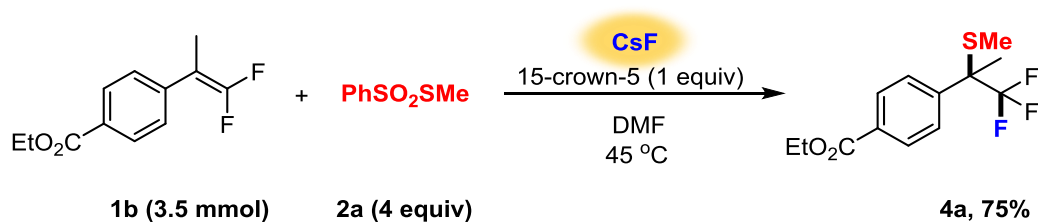

A mixture of **1a** (3.5 mmol), **2a** (4 equiv), CsF (4 equiv) and 15-crown-5 (1 equiv) in DMF (30 mL) under N<sub>2</sub> atmosphere was stirred at 45 °C. After the reaction was completed (determined by TLC analysis), the reaction mixture was filtered on celite and evaporated under reduced pressure, and purified by column chromatography to give the desired product **4a** (0.7680 g, Yield = 75%, pet. ether/EtOAc = 30/1).

## 5. Synthetic application of $\alpha$ -Trifluoromethyl Sulfides.

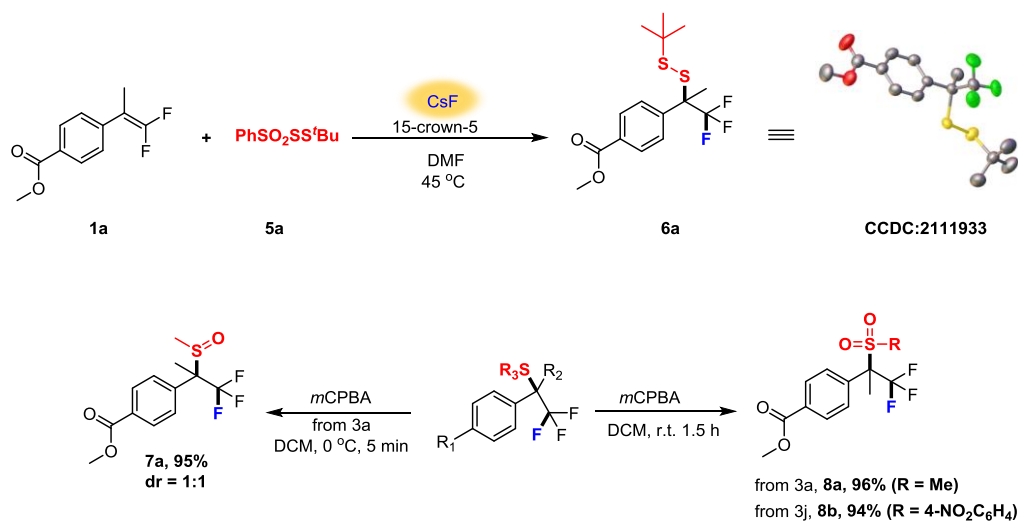

1) Synthesis of **6a**. A mixture of **1a** (0.15 mmol), **2** (4 equiv), and 15-crown-5 (1 equiv) in DMF (1.5 mL) under N<sub>2</sub> atmosphere was stirred at 45 °C. After the reaction was completed (determined by TLC analysis), the reaction mixture was filtered on celite and evaporated under reduced pressure, and purified by column chromatography to give the desired product **6a**.

2) Synthesis of **7a**. To an oven-dried 25 mL flask was added **3** (0.1 mmol), *m*-CPBA (1 equiv), DCM (1.0 mL). The reaction was allowed to stir at 0 °C under air for 5 min. Then the reaction was quenched by saturated NaHCO<sub>3</sub> solution (10 mL), extracted by DCM (3 × 10 mL). The combined organic layers were dried over Na<sub>2</sub>SO<sub>4</sub>, filtered, concentrated, and the residue was purified by silica gel column chromatography (petroleum ether/ethyl acetate = 1:1) to afford the product.

3) Synthesis of **8a** and **8b**. To an oven-dried 25 mL flask was added **3** (0.1 mmol), *m*-CPBA (2 equiv), DCM (1.0 mL). The reaction was allowed to stir at r.t. under air for 1.5 h. Then the reaction was quenched by saturated NaHCO<sub>3</sub> solution (10 mL), extracted by DCM (3 × 10 mL). The combined organic layers were dried over Na<sub>2</sub>SO<sub>4</sub>, filtered, concentrated, and the residue was purified by silica gel column chromatography (petroleum ether/ethyl acetate = 2:1) to afford the product.

## 6. X-ray Crystallography Data

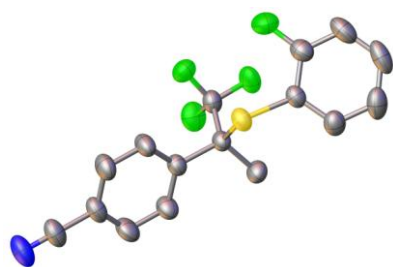

CCDC:2111934

≡

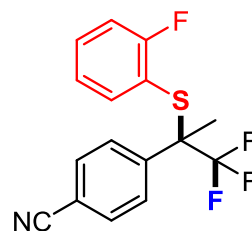

4d

CCDC 2111934 (**4d**) contain the supplementary crystallographic data for this paper. These data can be obtained free of charge from The Cambridge Crystallographic Data Centre.

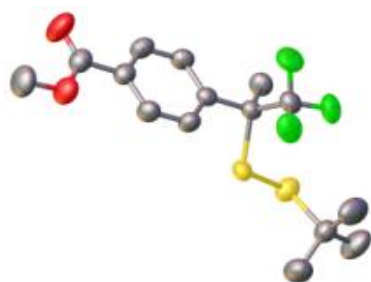

CCDC:2111933

≡

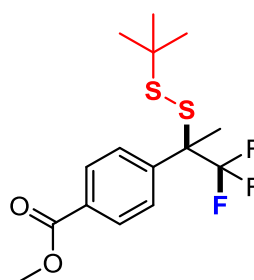

6a

CCDC 2111933 (**6a**) contain the supplementary crystallographic data for this paper. These data can be obtained free of charge from The Cambridge Crystallographic Data Centre.

## 7. Characterization Data

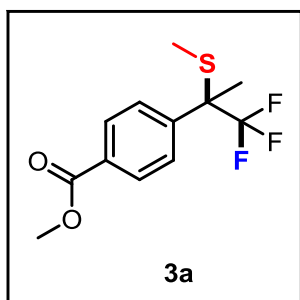

Yield: 90% (colorless oil, 37.5 mg, pet. ether/EtOAc = 30/1). <sup>1</sup>H NMR (400 MHz, CDCl<sub>3</sub>) δ 8.04 (d, *J* = 8.8 Hz, 2H), 7.71 (d, *J* = 8.1 Hz, 2H), 3.93 (s, 3H), 1.94 (s, 3H), 1.87 (s, 3H). <sup>13</sup>C NMR (101 MHz, CDCl<sub>3</sub>) δ 166.5, 142.0, 129.8, 129.6, 128.0 (d, *J* = 2.0 Hz), 127.5 (q, *J* = 284.8 Hz), 54.5 (q, *J* = 26.3 Hz), 52.2, 22.2 (d, *J* = 1.0 Hz), 13.6 (d, *J* = 1.0 Hz). <sup>19</sup>F NMR (376 MHz, CDCl<sub>3</sub>) δ -70.15. IR (neat): 2952, 1724, 1612, 1436, 1276, 964, 862, 757 cm<sup>-1</sup>. HRMS (ESI, *m/z*) calcd for C<sub>12</sub>H<sub>13</sub>F<sub>3</sub>O<sub>2</sub>S [M+H]<sup>+</sup> 279.0661, found 279.0661.

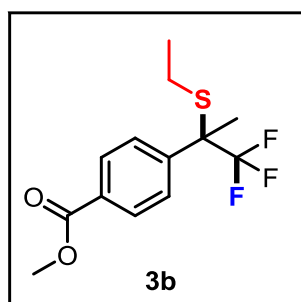

Yield: 95% (colorless oil, 41.6 mg, pet. ether/EtOAc = 30/1). <sup>1</sup>H NMR (400 MHz, CDCl<sub>3</sub>) δ 8.03 (d, *J* = 8.7 Hz, 2H), 7.72 (d, *J* = 7.9 Hz, 2H), 3.93 (s, 3H), 2.56 - 2.44 (m, 1H), 2.38 - 2.25 (m, 1H), 1.88 (s, 3H), 1.10 (t, *J* = 7.6 Hz, 3H). <sup>13</sup>C NMR (101 MHz, CDCl<sub>3</sub>) δ 166.5, 142.6, 129.7, 129.6, 128.7, 128.0 (q, *J* = 283.8 Hz), 127.9 (d, *J* = 1.0 Hz), 55.1 (q, *J* = 27.3 Hz), 52.2, 24.5, 22.7, 13.4. <sup>19</sup>F NMR (377 MHz, CDCl<sub>3</sub>) δ -70.35. IR (neat): 2952, 1724, 1612, 1438, 1274, 968, 859, 757 cm<sup>-1</sup>. HRMS (ESI, *m/z*) calcd for C<sub>13</sub>H<sub>15</sub>F<sub>3</sub>O<sub>2</sub>S [M+H]<sup>+</sup> 293.0818, found 293.0811.

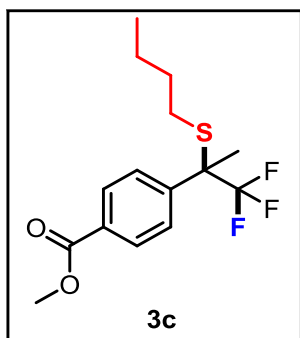

Yield: 85% (colorless oil, 40.8 mg, pet. ether/EtOAc = 30/1).  $^1\text{H}$  NMR (500 MHz,  $\text{CDCl}_3$ )  $\delta$  8.03 (d,  $J = 8.7$  Hz, 2H), 7.72 (d,  $J = 8.2$  Hz, 2H), 3.93 (s, 3H), 2.49 - 2.44 (m, 1H), 2.30 - 2.25 (m, 1H), 1.88 (s, 3H), 1.46 - 1.38 (m, 2H), 1.34 - 1.28 (m, 2H), 0.82 (t,  $J = 7.3$  Hz, 3H).  $^{13}\text{C}$  NMR (126 MHz,  $\text{CDCl}_3$ )  $\delta$  166.5, 142.6, 129.7, 129.5, 127.9 (d,  $J = 1.3$  Hz), 127.3 (q,  $J = 283.5$  Hz), 55.0 (q,  $J = 27.7$  Hz), 52.2, 30.6, 30.0, 22.8 (d,  $J = 1.3$  Hz), 21.9, 13.5.  $^{19}\text{F}$  NMR (471 MHz,  $\text{CDCl}_3$ )  $\delta$  -70.28. IR (neat): 2953, 1730, 1612, 1459, 1276, 970, 859, 762  $\text{cm}^{-1}$ . HRMS (ESI,  $m/z$ ) calcd for  $\text{C}_{15}\text{H}_{19}\text{F}_3\text{O}_2\text{S}$   $[\text{M}+\text{H}]^+$  321.1131, found 321.1114.

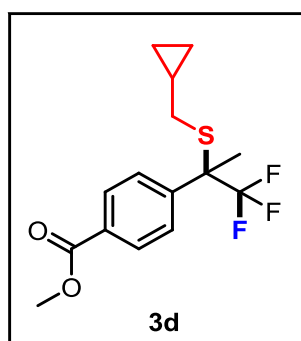

Yield: 72% (colorless oil, 24.8 mg, pet. ether/EtOAc = 30/1).  $^1\text{H}$  NMR (500 MHz,  $\text{CDCl}_3$ )  $\delta$  8.03 (d,  $J = 8.7$  Hz, 2H), 7.73 (d,  $J = 8.2$  Hz, 2H), 3.93 (s, 3H), 2.41 (q,  $J = 2.5$  Hz, 1H), 2.19 (q,  $J = 2.5$  Hz, 1H), 1.87 (s, 3H), 0.80 - 0.75 (m, 1H), 0.50 (d,  $J = 2.5$  Hz, 2H), 0.10 (q,  $J = 1.2$  Hz, 2H).  $^{13}\text{C}$  NMR (126 MHz,  $\text{CDCl}_3$ )  $\delta$  166.5, 142.6, 129.7, 129.6, 127.9 (d,  $J = 1.3$  Hz), 127.8 (q,  $J = 173.9$  Hz), 55.0 (q,  $J = 26.5$  Hz), 52.2, 36.4, 22.9, 9.7, 5.6 (d,  $J = 2.5$  Hz).  $^{19}\text{F}$  NMR (471 MHz,  $\text{CDCl}_3$ )  $\delta$  -70.26. IR (neat): 2960, 1725, 1612, 1438, 1276, 967, 860, 757  $\text{cm}^{-1}$ . HRMS (ESI,  $m/z$ ) calcd for  $\text{C}_{15}\text{H}_{17}\text{F}_3\text{O}_2\text{S}$   $[\text{M}+\text{H}]^+$  319.0974, found 319.0967.

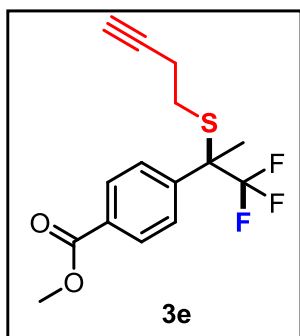

Yield: 68% (colorless oil, 21.1 mg, pet. ether/EtOAc = 30/1).  $^1\text{H}$  NMR (500 MHz,  $\text{CDCl}_3$ )  $\delta$  8.04 (d,  $J = 8.7$  Hz, 2H), 7.73 (d,  $J = 8.3$  Hz, 2H), 3.93 (s, 3H), 2.67 - 2.62 (m, 1H), 2.50 - 2.44 (m, 1H), 2.30 (td,  $J = 7.4, 2.6$  Hz, 2H), 2.00 (t,  $J = 2.7$  Hz, 1H), 1.89 (s, 3H).  $^{13}\text{C}$  NMR (126 MHz,  $\text{CDCl}_3$ )  $\delta$  166.4, 142.2, 129.9, 129.7, 127.9 (d,  $J = 2.5$  Hz), 127.2 (d,  $J = 283.5$  Hz), 81.7, 69.8, 69.8, 55.4 (q,  $J = 26.5$  Hz), 52.3, 29.3, 22.3 (d,  $J = 2.5$  Hz), 18.8.  $^{19}\text{F}$  NMR (471 MHz,  $\text{CDCl}_3$ )  $\delta$  -70.18. IR (neat): 3298, 2951, 1723, 1612, 1436, 1277, 966, 862, 767  $\text{cm}^{-1}$ . HRMS (ESI,  $m/z$ ) calcd for  $\text{C}_{15}\text{H}_{15}\text{F}_3\text{O}_2\text{S}$   $[\text{M}+\text{H}]^+$  317.0818, found 317.0819.

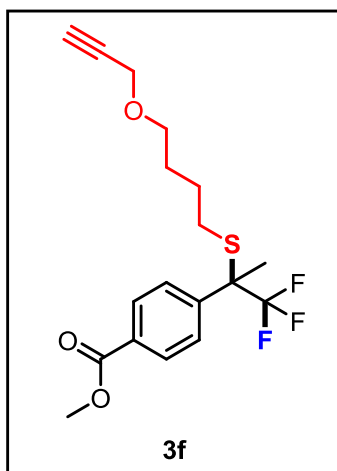

Yield: 88% (colorless oil, 49.4 mg, pet. ether/EtOAc = 30/1).  $^1\text{H}$  NMR (500 MHz,  $\text{CDCl}_3$ )  $\delta$  8.03 (d,  $J = 8.7$  Hz, 2H), 7.72 (d,  $J = 8.2$  Hz, 2H), 4.07 (d,  $J = 2.4$  Hz, 2H), 3.93 (s, 3H), 3.43 (t,  $J = 6.0$  Hz, 2H), 2.52 - 2.47 (m, 1H), 2.41 (t,  $J = 2.3$  Hz, 1H), 2.33 - 2.28 (m, 1H), 1.88 (s, 3H), 1.61 - 1.48 (m, 4H).  $^{13}\text{C}$  NMR (126 MHz,  $\text{CDCl}_3$ )  $\delta$  166.5, 142.5, 129.8, 129.6, 127.9 (d,  $J = 2.5$  Hz), 127.3 (d,  $J = 283.5$  Hz), 79.8, 74.2, 69.2, 58.0, 55.1 (q,  $J = 26.5$  Hz), 52.2, 38.7, 30.1, 28.5, 25.2, 22.8 (d,  $J = 2.5$  Hz).  $^{19}\text{F}$  NMR (471 MHz,  $\text{CDCl}_3$ )  $\delta$  -70.28. IR (neat): 3296, 2946, 2856, 1723, 1612, 1439,



1276, 865, 720  $\text{cm}^{-1}$ . HRMS (ESI,  $m/z$ ) calcd for  $\text{C}_{18}\text{H}_{21}\text{F}_3\text{O}_3\text{S}$   $[\text{M}+\text{H}]^+$  375.1236, found 375.1247.

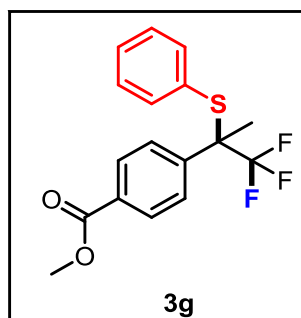

Yield: 93% (colorless oil, 47.4 mg, pet. ether/EtOAc = 15/1).  $^1\text{H}$  NMR (400 MHz,  $\text{CDCl}_3$ )  $\delta$  8.01 (d,  $J = 8.5$  Hz, 2H), 7.68 (d,  $J = 8.5$  Hz, 2H), 7.39 - 7.30 (m, 3H), 7.26 - 7.20 (m, 2H), 3.92 (s, 3H), 1.79 (s, 3H).  $^{13}\text{C}$  NMR (101 MHz,  $\text{CDCl}_3$ )  $\delta$  166.5, 142.3, 137.6, 130.0, 129.9, 129.4, 129.4, 128.7, 128.2 (d,  $J = 1.0$  Hz), 126.8 (q,  $J = 284.8$  Hz), 57.3 (q,  $J = 26.3$  Hz), 52.2, 21.4 (d,  $J = 2.0$  Hz).  $^{19}\text{F}$  NMR (376 MHz,  $\text{CDCl}_3$ )  $\delta$  -70.14. IR (neat): 2951, 1723, 1437, 1279, 855, 752  $\text{cm}^{-1}$ . HRMS (ESI,  $m/z$ ) calcd for  $\text{C}_{17}\text{H}_{15}\text{F}_3\text{O}_2\text{S}$   $[\text{M}+\text{H}]^+$  341.0818, found 341.0814.

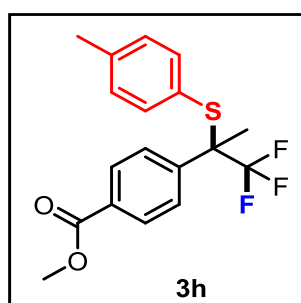

Yield: 96% (colorless oil, 51.0 mg, pet. ether/EtOAc = 15/1).  $^1\text{H}$  NMR (500 MHz,  $\text{CDCl}_3$ )  $\delta$  8.01 (d,  $J = 8.6$  Hz, 2H), 7.68 (d,  $J = 8.4$  Hz, 2H), 7.23 (d,  $J = 8.2$  Hz, 2H), 7.04 (d,  $J = 8.0$  Hz, 2H), 3.92 (s, 3H), 2.31 (s, 3H), 1.77 (s, 3H).  $^{13}\text{C}$  NMR (126 MHz,  $\text{CDCl}_3$ )  $\delta$  166.6, 142.4, 140.3, 137.5, 129.9, 129.5, 129.4, 128.2 (d,  $J = 1.3$  Hz), 126.9 (q,  $J = 284.8$  Hz), 125.9, 57.1 (q,  $J = 26.5$  Hz), 52.2, 21.3 (d,  $J = 1.3$  Hz), 21.3.  $^{19}\text{F}$  NMR (376 MHz,  $\text{CDCl}_3$ )  $\delta$  -70.15. IR (neat): 2924, 1724, 1459, 1281, 811, 717  $\text{cm}^{-1}$ . HRMS (ESI,  $m/z$ ) calcd for  $\text{C}_{18}\text{H}_{17}\text{F}_3\text{O}_2\text{S}$   $[\text{M}+\text{H}]^+$  355.0974, found 355.0965.

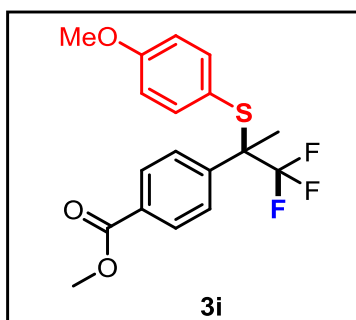

Yield: 98% (white solid, 54.4 mg, pet. ether/EtOAc = 15/1).  $^1\text{H}$  NMR (500 MHz,  $\text{CDCl}_3$ )  $\delta$  8.01 (d,  $J = 8.6$  Hz, 2H), 7.66 (d,  $J = 8.3$  Hz, 2H), 7.27 (d,  $J = 8.8$  Hz, 2H), 6.76 (d,  $J = 8.9$  Hz, 2H), 3.93 (s, 3H), 3.78 (s, 3H), 1.77 (s, 3H).  $^{13}\text{C}$  NMR (126 MHz,  $\text{CDCl}_3$ )  $\delta$  166.6, 161.1, 142.3, 139.2, 129.9, 129.4, 128.1 (d,  $J = 2.5$  Hz), 126.9 (q,  $J = 283.5$  Hz), 120.1, 114.2, 57.1 (q,  $J = 26.5$  Hz), 55.3, 52.2, 21.2 (d,  $J = 2.5$  Hz).  $^{19}\text{F}$  NMR (376 MHz,  $\text{CDCl}_3$ )  $\delta$  -70.15. IR (neat): 2924, 1724, 1459, 1281, 811, 763  $\text{cm}^{-1}$ . HRMS (ESI,  $m/z$ ) calcd for  $\text{C}_{18}\text{H}_{17}\text{F}_3\text{O}_3\text{S}$   $[\text{M}+\text{H}]^+$  371.0923, found 371.0924.

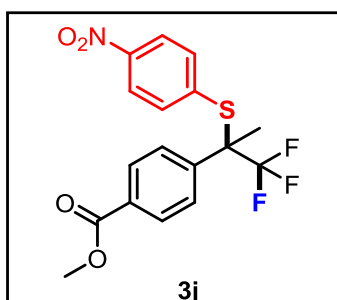

Yield: 95% (colorless oil, 56.6 mg, pet. ether/EtOAc = 15/1).  $^1\text{H}$  NMR (500 MHz,  $\text{CDCl}_3$ )  $\delta$  8.00 - 7.95 (m, 4H), 7.61 (d,  $J = 1.2$  Hz, 2H), 7.36 (d,  $J = 2.5$  Hz, 2H), 3.87 (s, 3H), 1.81 (s, 3H).  $^{13}\text{C}$  NMR (126 MHz,  $\text{CDCl}_3$ )  $\delta$  165.2, 147.4, 140.3, 137.2, 136.1, 129.4, 128.7, 127.1, 125.3 (q,  $J = 283.5$  Hz), 122.5, 57.4 (d,  $J = 26.5$  Hz), 51.3, 21.1 (d,  $J = 1.3$  Hz).  $^{19}\text{F}$  NMR (471 MHz,  $\text{CDCl}_3$ )  $\delta$  -69.87. IR (neat): 2953, 1723, 1608, 1527, 1348, 1279, 908, 873, 728  $\text{cm}^{-1}$ . HRMS (ESI,  $m/z$ ) calcd for  $\text{C}_{17}\text{H}_{14}\text{F}_3\text{NO}_4\text{S}$   $[\text{M}+\text{H}]^+$  386.0668, found 386.0650.

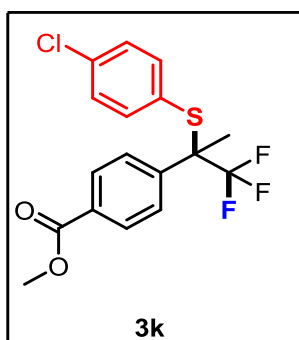

Yield: 93% (colorless oil, 52.2 mg, pet. ether/EtOAc = 15/1).  $^1\text{H}$  NMR (500 MHz,  $\text{CDCl}_3$ )  $\delta$  8.02 (d,  $J = 8.7$  Hz, 2H), 7.66 (d,  $J = 8.3$  Hz, 2H), 7.27 - 7.24 (m, 2H), 7.22 - 7.19 (m, 2H), 3.93 (s, 3H), 1.80 (s, 3H).  $^{13}\text{C}$  NMR (126 MHz,  $\text{CDCl}_3$ )  $\delta$  166.4, 141.9, 138.7, 136.6, 130.1, 129.5, 129.0, 128.6 (q,  $J = 283.5$  Hz), 128.1 (d,  $J = 2.5$  Hz), 57.5 (q,  $J = 26.5$  Hz), 52.3, 21.5 (d,  $J = 2.5$  Hz).  $^{19}\text{F}$  NMR (471 MHz,  $\text{CDCl}_3$ )  $\delta$  -69.98. IR (neat): 2921, 1723, 1465, 1278, 819, 714  $\text{cm}^{-1}$ . HRMS (ESI,  $m/z$ ) calcd for  $\text{C}_{17}\text{H}_{14}\text{ClF}_3\text{O}_2\text{S}$   $[\text{M}+\text{H}]^+$  375.0428, found 375.0427.

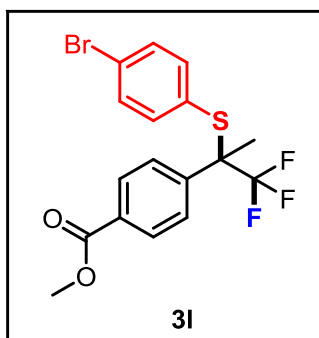

Yield: 95% (white solid, 59.6 mg, pet. ether/EtOAc = 15/1).  $^1\text{H}$  NMR (500 MHz,  $\text{CDCl}_3$ )  $\delta$  8.02 (d,  $J = 8.6$  Hz, 2H), 7.66 (d,  $J = 8.3$  Hz, 2H), 7.36 (d,  $J = 8.4$  Hz, 2H), 7.18 (d,  $J = 8.4$  Hz, 2H), 3.93 (s, 3H), 1.79 (s, 3H).  $^{13}\text{C}$  NMR (126 MHz,  $\text{CDCl}_3$ )  $\delta$  166.4, 141.9, 138.9, 132.0, 130.1, 129.5, 128.5, 128.1 (d,  $J = 2.5$  Hz), 126.4 (d,  $J = 283.5$  Hz), 125.0, 57.4 (d,  $J = 26.5$  Hz), 52.3, 21.5 (d,  $J = 2.5$  Hz).  $^{19}\text{F}$  NMR (471 MHz,  $\text{CDCl}_3$ )  $\delta$  -69.99. IR (neat): 2919, 1725, 1464, 1280, 820, 715  $\text{cm}^{-1}$ . HRMS (ESI,  $m/z$ ) calcd for  $\text{C}_{17}\text{H}_{14}\text{BrF}_3\text{O}_2\text{S}$   $[\text{M}+\text{H}]^+$  418.9923, found 418.9909.

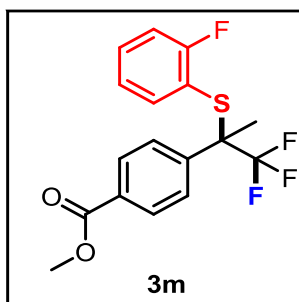

Yield: 91% (colorless oil, 48.9 mg, pet. ether/EtOAc = 15/1).  $^1\text{H}$  NMR (500 MHz,  $\text{CDCl}_3$ )  $\delta$  8.02 (d,  $J = 8.7$  Hz, 2H), 7.71 (d,  $J = 8.3$  Hz, 2H), 7.41 - 7.33 (m, 2H), 7.11 - 7.03 (m, 2H), 3.93 (s, 3H), 1.83 (s, 3H).  $^{13}\text{C}$  NMR (126 MHz,  $\text{CDCl}_3$ )  $\delta$  166.5, 165.3, 163.3, 141.7, 140.0, 132.8 (d,  $J = 8.8$  Hz), 128.0 (d,  $J = 2.5$  Hz), 125.6, 124.3 (d,  $J = 3.8$  Hz), 116.6 (d,  $J = 17.6$  Hz), 116.1 (d,  $J = 24.0$  Hz), 57.5 (d,  $J = 26.5$  Hz), 52.3, 21.1.  $^{19}\text{F}$  NMR (471 MHz,  $\text{CDCl}_3$ )  $\delta$  -70.69 (d,  $J = 2.7$  Hz), -103.36. IR (neat): 2952, 1723, 1438, 1278, 822, 715  $\text{cm}^{-1}$ . HRMS (ESI,  $m/z$ ) calcd for  $\text{C}_{17}\text{H}_{14}\text{F}_4\text{O}_2\text{S}$   $[\text{M}+\text{H}]^+$  359.0723, found 359.0714.

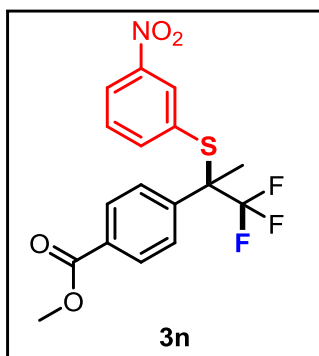

Yield: 96% (colorless oil, 55.4 mg, pet. ether/EtOAc = 15/1).  $^1\text{H}$  NMR (500 MHz,  $\text{CDCl}_3$ )  $\delta$  8.15 - 8.11 (m, 1H), 8.10 (t,  $J = 2.0$  Hz, 1H), 7.96 (d,  $J = 8.6$  Hz, 2H), 7.58 (d,  $J = 2.5$  Hz, 2H), 7.55 (d,  $J = 2.5$  Hz, 1H), 7.35 (t,  $J = 1.2$  Hz, 1H), 3.87 (s, 3H), 1.80 (s, 3H).  $^{13}\text{C}$  NMR (126 MHz,  $\text{CDCl}_3$ )  $\delta$  165.2, 146.9, 141.9, 140.1, 131.0, 130.7, 129.4, 128.7, 128.4, 126.9 (d,  $J = 1.3$  Hz), 123.7, 57.1 (q,  $J = 25.2$  Hz), 51.3, 20.8 (d,  $J = 1.3$  Hz).  $^{19}\text{F}$  NMR (471 MHz,  $\text{CDCl}_3$ )  $\delta$  -69.71. IR (neat): 2958, 1723, 1609, 1527, 1348, 1275, 905, 804, 738  $\text{cm}^{-1}$ . HRMS (ESI,  $m/z$ ) calcd for  $\text{C}_{17}\text{H}_{14}\text{F}_3\text{NO}_4\text{S}$   $[\text{M}+\text{H}]^+$  386.0668, found 386.0652.

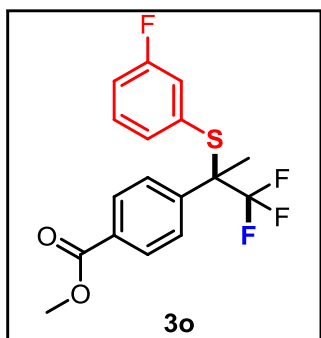

Yield: 96% (colorless oil, 51.6 mg, pet. ether/EtOAc = 15/1).  $^1\text{H}$  NMR (500 MHz,  $\text{CDCl}_3$ )  $\delta$  8.03 (d,  $J = 8.7$  Hz, 2H), 7.67 (d,  $J = 8.3$  Hz, 2H), 7.20 (dd,  $J = 7.8, 5.9$  Hz, 1H), 7.12 (dt,  $J = 7.7, 1.4$  Hz, 1H), 7.08 - 7.05 (m, 1H), 3.93 (s, 3H), 1.82 (s, 3H).  $^{13}\text{C}$  NMR (126 MHz,  $\text{CDCl}_3$ )  $\delta$  166.4, 163.0, 161.0, 141.8, 133.1 (d,  $J = 3.8$  Hz), 131.3 (d,  $J = 7.6$  Hz), 130.1, 129.8 (d,  $J = 7.6$  Hz), 129.5, 128.1 (d,  $J = 8.3$  Hz), 126.7 (d,  $J = 283.5$  Hz), 124.0 (d,  $J = 21.4$  Hz), 117.2 (d,  $J = 21.4$  Hz), 57.6 (q,  $J = 26.5$  Hz), 52.3, 21.5 (d,  $J = 2.5$  Hz).  $^{19}\text{F}$  NMR (471 MHz,  $\text{CDCl}_3$ )  $\delta$  -70.12, -111.98. IR (neat): 2953, 1724, 1581, 1468, 1278, 1072, 967, 716  $\text{cm}^{-1}$ . HRMS (ESI,  $m/z$ ) calcd for  $\text{C}_{17}\text{H}_{14}\text{F}_4\text{O}_2\text{S}$   $[\text{M}+\text{H}]^+$  359.0723, found 359.0703.

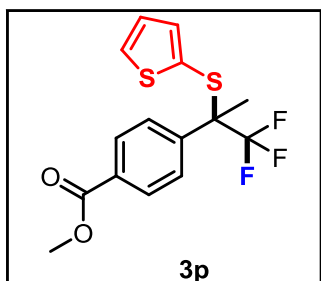

Yield: 78% (colorless oil, 40.5 mg, pet. ether/EtOAc = 15/1).  $^1\text{H}$  NMR (500 MHz,  $\text{CDCl}_3$ )  $\delta$  8.02 (d,  $J = 8.7$  Hz, 2H), 7.67 (d,  $J = 8.0$  Hz, 2H), 7.40 (dd,  $J = 5.5, 1.3$  Hz, 1H), 7.11 (dd,  $J = 3.6, 1.2$  Hz, 1H), 6.95 (dd,  $J = 5.4, 3.6$  Hz, 1H), 3.93 (s, 3H), 1.84 (s, 3H).  $^{13}\text{C}$  NMR (126 MHz,  $\text{CDCl}_3$ )  $\delta$  166.5, 141.6, 139.0, 132.8, 130.1, 129.5, 128.5 (q,  $J = 284.8$  Hz), 128.3 (d,  $J = 2.5$  Hz), 127.6, 127.5, 58.4 (q,  $J = 26.5$  Hz), 52.3, 21.1 (d,  $J = 2.5$  Hz).  $^{19}\text{F}$  NMR (471 MHz,  $\text{CDCl}_3$ )  $\delta$  -69.87. IR (neat): 2952, 1723, 1567, 1437, 1277, 756  $\text{cm}^{-1}$ . HRMS (ESI,  $m/z$ ) calcd for  $\text{C}_{15}\text{H}_{13}\text{F}_3\text{O}_2\text{S}_2$   $[\text{M}+\text{H}]^+$  347.0382, found 347.0373.

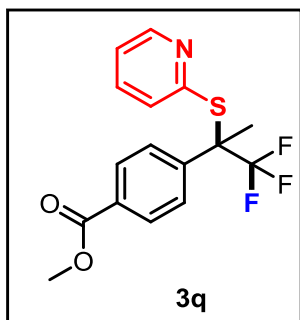

Yield: 53% (colorless oil, 27.1 mg, pet. ether/EtOAc = 15/1).  $^1\text{H}$  NMR (500 MHz,  $\text{CDCl}_3$ )  $\delta$  8.38 (ddd,  $J = 4.9, 1.9, 0.9$  Hz, 1H), 7.99 (d,  $J = 8.6$  Hz, 2H), 7.76 (d,  $J = 8.4$  Hz, 2H), 7.48 (td,  $J = 7.7, 2.0$  Hz, 1H), 7.29 - 7.22 (m, 1H), 7.11 - 7.08 (m, 1H), 3.91 (s, 3H), 2.13 (s, 3H).  $^{13}\text{C}$  NMR (126 MHz,  $\text{CDCl}_3$ )  $\delta$  166.6, 153.8, 149.9, 141.9, 136.6, 129.9, 129.3, 129.0, 128.5, 127.5, 125.3, 122.6, 58.5 (q,  $J = 26.5$  Hz), 52.2, 22.1 (d,  $J = 1.3$  Hz).  $^{19}\text{F}$  NMR (471 MHz,  $\text{CDCl}_3$ )  $\delta$  -71.06. IR (neat): 2950, 1721, 1560, 1450, 1152, 760  $\text{cm}^{-1}$ . HRMS (ESI, m/z) calcd for  $\text{C}_{16}\text{H}_{14}\text{F}_3\text{NO}_2\text{S}$   $[\text{M}+\text{H}]^+$  342.0770, found 342.0772.

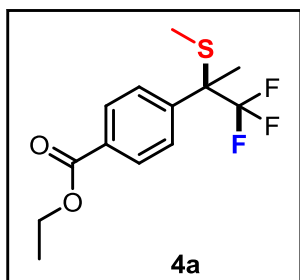

Yield: 89% (colorless oil, 39.0 mg, pet. ether/EtOAc = 30/1).  $^1\text{H}$  NMR (500 MHz,  $\text{CDCl}_3$ )  $\delta$  8.05 (d,  $J = 8.7$  Hz, 2H), 7.71 (d,  $J = 8.1$  Hz, 2H), 4.39 (q,  $J = 7.1$  Hz, 2H), 1.94 (s, 3H), 1.87 (s, 3H), 1.40 (t,  $J = 7.1$  Hz, 3H).  $^{13}\text{C}$  NMR (126 MHz,  $\text{CDCl}_3$ )  $\delta$  166.0, 141.9, 130.2, 129.6, 128.6, 127.9 (d,  $J = 2.5$  Hz), 127.5 (q,  $J = 283.5$  Hz), 61.1, 54.5 (d,  $J = 27.8$  Hz), 22.2 (d,  $J = 1.3$  Hz), 14.3, 13.6 (d,  $J = 1.3$  Hz).  $^{19}\text{F}$  NMR (471 MHz,  $\text{CDCl}_3$ )  $\delta$  -70.16. IR (neat): 2928, 1719, 1612, 1459, 1272, 963, 862, 716  $\text{cm}^{-1}$ . HRMS (ESI, m/z) calcd for  $\text{C}_{13}\text{H}_{15}\text{F}_3\text{O}_2\text{S}$   $[\text{M}+\text{H}]^+$  293.0818, found 293.0801.

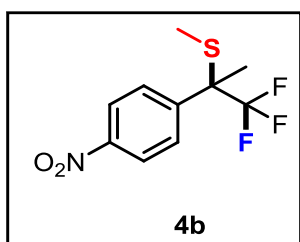

Yield: 88% (colorless oil, 35.0 mg, pet. ether/EtOAc = 30/1).  $^1\text{H}$  NMR (500 MHz,

CDCl<sub>3</sub>)  $\delta$  8.24 (d,  $J$  = 9.1 Hz, 2H), 7.84 (d,  $J$  = 8.7 Hz, 2H), 1.98 (s, 3H), 1.90 (s, 3H).  
<sup>13</sup>C NMR (126 MHz, CDCl<sub>3</sub>)  $\delta$  147.4, 144.4, 129.1 (d,  $J$  = 2.5 Hz), 127.2 (q,  $J$  = 283.5 Hz), 123.5, 54.5 (q,  $J$  = 27.7 Hz), 29.7, 22.3 (d,  $J$  = 2.5 Hz), 13.7 (d,  $J$  = 2.5 Hz).  
<sup>19</sup>F NMR (471 MHz, CDCl<sub>3</sub>)  $\delta$  -70.07. IR (neat): 2925, 2855, 1603, 1524, 1460, 1349, 1260, 1157, 1076, 962, 861, 754 cm<sup>-1</sup>. HRMS (ESI, m/z) calcd for C<sub>10</sub>H<sub>10</sub>F<sub>3</sub>NO<sub>2</sub>S [M+H]<sup>+</sup> 266.0457, found 266.0451.

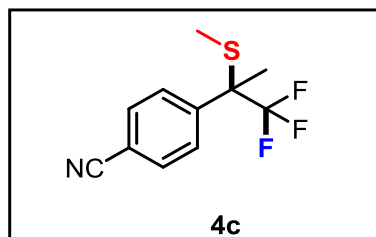

Yield: 94% (colorless oil, 34.5 mg, pet. ether/EtOAc = 30/1). <sup>1</sup>H NMR (500 MHz, CDCl<sub>3</sub>)  $\delta$  7.77 (d,  $J$  = 8.2 Hz, 2H), 7.69 (d,  $J$  = 8.7 Hz, 2H), 1.96 (d,  $J$  = 1.2 Hz, 3H), 1.86 (s, 3H). <sup>13</sup>C NMR (126 MHz, CDCl<sub>3</sub>)  $\delta$  142.4, 132.2, 128.8 (d,  $J$  = 2.5 Hz), 127.2 (d,  $J$  = 283.5 Hz), 118.2, 112.2, 54.5 (q,  $J$  = 27.8 Hz), 22.1 (d,  $J$  = 1.3 Hz), 13.6 (d,  $J$  = 2.5 Hz). <sup>19</sup>F NMR (471 MHz, CDCl<sub>3</sub>)  $\delta$  -70.10. IR (neat): 2918, 2181, 1728, 1459, 1157, 971, 857, 755 cm<sup>-1</sup>. HRMS (ESI, m/z) calcd for C<sub>11</sub>H<sub>10</sub>F<sub>3</sub>NS [M+H]<sup>+</sup> 246.0559, found 246.0550.

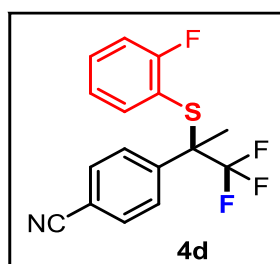

Yield: 96% (colorless oil, 33.8 mg, pet. ether/EtOAc = 15/1). <sup>1</sup>H NMR (500 MHz, CDCl<sub>3</sub>)  $\delta$  7.74 (d,  $J$  = 8.4 Hz, 2H), 7.66 (d,  $J$  = 8.7 Hz, 2H), 7.46 - 7.35 (m, 2H), 7.12 - 7.02 (m, 2H), 1.82 (s, 3H). <sup>13</sup>C NMR (126 MHz, CDCl<sub>3</sub>)  $\delta$  165.3, 163.3, 142.0, 140.0, 133.1 (d,  $J$  = 7.6 Hz), 132.0, 128.8 (d,  $J$  = 1.3 Hz), 126.5 (q,  $J$  = 284.8 Hz), 124.5 (d,  $J$  = 3.8 Hz), 118.2, 116.2 (d,  $J$  = 24.0 Hz), 112.5, 57.5 (q,  $J$  = 26.5 Hz), 21.0 (d,  $J$  = 1.3 Hz). <sup>19</sup>F NMR (471 MHz, CDCl<sub>3</sub>)  $\delta$  -70.61 (d,  $J$  = 3.0 Hz), -103.21 (q,  $J$  = 2.8 Hz). IR (neat): 3704, 2929, 2231, 1724, 1469, 1168, 956, 844, 691 cm<sup>-1</sup>. HRMS (ESI, m/z) calcd for C<sub>16</sub>H<sub>11</sub>F<sub>4</sub>NS [M+H]<sup>+</sup> 326.0621, found 326.0611.

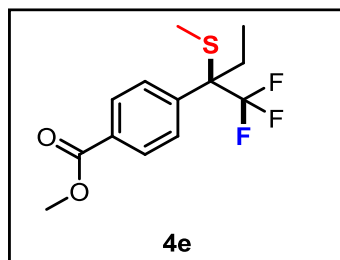

Yield: 72% (colorless oil, 31.5 mg, pet. ether/EtOAc = 15/1),  $^1\text{H}$  NMR (500 MHz,  $\text{CDCl}_3$ )  $\delta$  8.04 (d,  $J = 8.7$  Hz, 2H), 7.68 (d,  $J = 7.9$  Hz, 2H), 3.93 (s, 3H), 2.35 - 2.27 (m, 1H), 2.23 - 2.15 (m, 1H), 1.98 (s, 3H), 0.91 (t,  $J = 1.2$ , 3H).  $^{13}\text{C}$  NMR (126 MHz,  $\text{CDCl}_3$ )  $\delta$  166.5, 140.2, 129.7, 129.6, 129.3, 128.5 (d,  $J = 1.3$  Hz), 127.8 (q,  $J = 284.8$  Hz), 59.3 (d,  $J = 25.2$  Hz), 52.2, 27.4, 13.5 (d,  $J = 2.5$  Hz), 8.8.  $^{19}\text{F}$  NMR (471 MHz,  $\text{CDCl}_3$ )  $\delta$  -67.04. IR (neat): 2931, 1725, 1612, 1436, 1279, 968, 719  $\text{cm}^{-1}$ . HRMS (ESI,  $m/z$ ) calcd for  $\text{C}_{13}\text{H}_{15}\text{F}_3\text{O}_2\text{S}$   $[\text{M}+\text{H}]^+$  293.0818, found 293.0809.

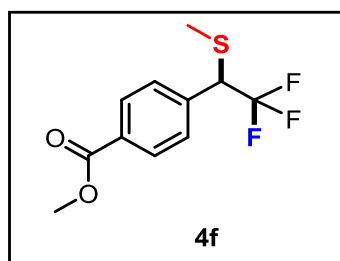

Yield: 59% (colorless oil, 23.4 mg, pet. ether/EtOAc = 30/1),  $^1\text{H}$  NMR (400 MHz,  $\text{CDCl}_3$ )  $\delta$  8.05 (d,  $J = 8.4$  Hz, 2H), 7.47 (d,  $J = 8.1$  Hz, 2H), 4.26 (q,  $J = 8.3$  Hz, 1H), 3.93 (s, 3H), 2.17 (d,  $J = 1.0$  Hz, 3H).  $^{13}\text{C}$  NMR (101 MHz,  $\text{CDCl}_3$ )  $\delta$  166.4, 138.1 (d,  $J = 2.0$  Hz), 130.6, 130.0, 128.9, 125.8 (q,  $J = 280.8$  Hz), 53.5 (q,  $J = 30.3$  Hz), 52.3, 15.9.  $^{19}\text{F}$  NMR (376 MHz,  $\text{CDCl}_3$ )  $\delta$  -67.49. IR (neat): 2918, 1738, 1460, 972, 728  $\text{cm}^{-1}$ . HRMS (ESI,  $m/z$ ) calcd for  $\text{C}_{11}\text{H}_{11}\text{F}_3\text{O}_2\text{S}$   $[\text{M}+\text{H}]^+$  265.0505, found 265.0499.

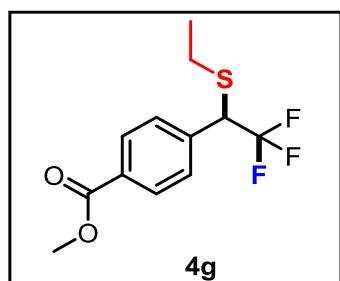

Yield: 56% (colorless oil, 23.4 mg, pet. ether/EtOAc = 30/1),  $^1\text{H}$  NMR (400 MHz,  $\text{CDCl}_3$ )  $\delta$  8.04 (d,  $J = 8.5$  Hz, 2H), 7.48 (d,  $J = 8.2$  Hz, 2H), 4.33 (q,  $J = 8.3$  Hz, 1H), 3.93 (s, 3H), 2.71 - 2.58 (m, 2H), 1.25 (t,  $J = 7.4$  Hz, 3H).  $^{13}\text{C}$  NMR (101 MHz,



CDCl<sub>3</sub>)  $\delta$  166.5, 138.7, 130.5, 130.0, 129.0, 128.4 (q,  $J = 280.8$  Hz), 52.3, 51.8 (q,  $J = 30.3$  Hz), 26.9, 14.1. <sup>19</sup>F NMR (377 MHz, CDCl<sub>3</sub>)  $\delta$  -67.77. IR (neat): 2921, 1725, 1611, 1457, 1281, 813, 717 cm<sup>-1</sup>. HRMS (ESI, m/z) calcd for C<sub>12</sub>H<sub>13</sub>F<sub>3</sub>O<sub>2</sub>S [M+H]<sup>+</sup> 279.0661, found 279.0653.

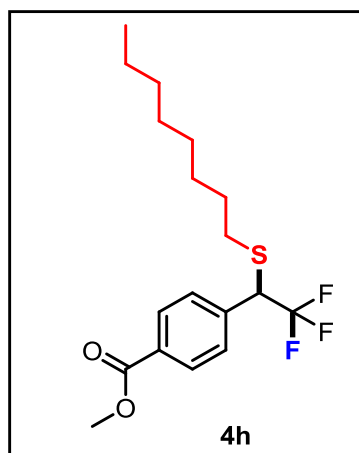

Yield: 53% (colorless oil, 28.8 mg, pet. ether/EtOAc = 30/1), <sup>1</sup>H NMR (500 MHz, CDCl<sub>3</sub>)  $\delta$  8.04 (d,  $J = 8.4$  Hz, 2H), 7.48 (d,  $J = 8.2$  Hz, 2H), 4.30 (q,  $J = 8.3$  Hz, 1H), 3.92 (s, 3H), 2.64 - 2.56 (m, 2H), 1.55 (td,  $J = 7.9, 5.1$  Hz, 2H), 1.35- 1.24 (m, 10H), 0.87 (t,  $J = 7.0$  Hz, 3H). <sup>13</sup>C NMR (126 MHz, CDCl<sub>3</sub>)  $\delta$  166.5, 138.8, 130.5, 130.0, 129.0, 127.3 (t,  $J = 280.0$  Hz), 52.3, 52.1 (t,  $J = 30.2$  Hz), 32.9, 31.8, 29.1, 29.0, 28.9, 28.6, 22.6 (t,  $J = 2.5$  Hz), 14.1 (t,  $J = 2.5$  Hz). <sup>19</sup>F NMR (471 MHz, CDCl<sub>3</sub>)  $\delta$  -67.76. IR (neat): 2924, 1725, 1612, 1437, 1277, 840, 711 cm<sup>-1</sup>. HRMS (ESI, m/z) calcd for C<sub>18</sub>H<sub>25</sub>F<sub>3</sub>O<sub>2</sub>S [M+H]<sup>+</sup> 363.1600, found 363.1584.

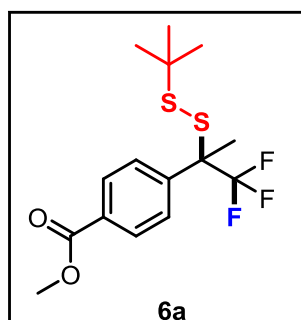

Yield: 42% (white solid, 21.1 mg, pet. ether/EtOAc = 30/1). <sup>1</sup>H NMR (500 MHz, CDCl<sub>3</sub>)  $\delta$  8.03 (d,  $J = 8.7$  Hz, 2H), 7.70 (d,  $J = 8.2$  Hz, 2H), 3.93 (s, 3H), 1.95 (s, 3H), 1.17 (s, 9H). <sup>13</sup>C NMR (126 MHz, CDCl<sub>3</sub>)  $\delta$  166.48, 141.93, 130.20, 129.50, 128.16 (d,  $J = 1.3$  Hz), 127.69 (d,  $J = 31.5$  Hz), 56.85 (d,  $J = 26.5$  Hz), 52.27, 48.13, 30.17,

19.90 (d,  $J = 1.3$  Hz).  $^{19}\text{F}$  NMR (471 MHz,  $\text{CDCl}_3$ )  $\delta$  -70.50. IR (neat): 2922, 1721, 1608, 1457, 1261, 824, 714  $\text{cm}^{-1}$ . HRMS (ESI,  $m/z$ ) calcd for  $\text{C}_{15}\text{H}_{19}\text{F}_3\text{O}_2\text{S}_2$   $[\text{M}+\text{H}]^+$  353.0851, found 353.0859.

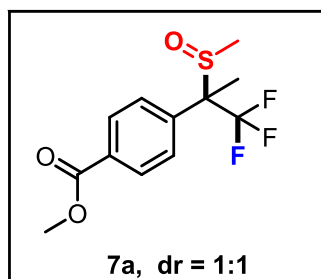

Yield: 95% (colorless oil, 28.8 mg, pet. ether/EtOAc = 1/1),  $^1\text{H}$  NMR (500 MHz,  $\text{CDCl}_3$ )  $\delta$  8.21 - 8.05 (m, 4H), 7.75 (d,  $J = 8.3$  Hz, 2H), 7.57 (d,  $J = 8.3$  Hz, 2H), 3.94 (s, 6H), 2.36 (s, 3H), 2.04 (s, 3H), 1.95 (s, 3H), 1.80 (s, 3H).  $^{13}\text{C}$  NMR (126 MHz,  $\text{CDCl}_3$ )  $\delta$  166.3, 166.1, 136.3, 135.5, 131.3 (d,  $J = 2.5$  Hz), 130.9, 130.3, 129.9, 128.4 (d,  $J = 1.3$  Hz), 127.4 (d,  $J = 1.3$  Hz), 127.0, 126.6, 124.8, 124.4, 67.7 (d,  $J = 25.2$  Hz), 66.4 (d,  $J = 25.2$  Hz), 65.6, 52.5, 52.4, 34.6, 34.2, 12.7 (d,  $J = 3.8$  Hz), 10.1 (d,  $J = 3.8$  Hz).  $^{19}\text{F}$  NMR (471 MHz,  $\text{CDCl}_3$ )  $\delta$  -66.24, -67.21. IR (neat): 2955, 1722, 1612, 1436, 1232, 868, 715  $\text{cm}^{-1}$ . HRMS (ESI,  $m/z$ ) calcd for  $\text{C}_{12}\text{H}_{13}\text{F}_3\text{O}_3\text{S}$   $[\text{M}+\text{H}]^+$  295.0610, found 295.0603.

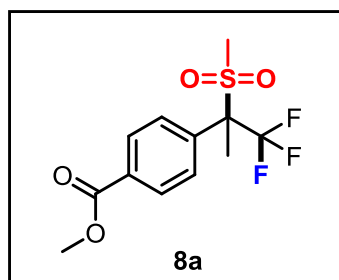

Yield: 96% (white solid, 30.4 mg, pet. ether/EtOAc = 2/1),  $^1\text{H}$  NMR (500 MHz,  $\text{CDCl}_3$ )  $\delta$  8.12 (d,  $J = 8.4$  Hz, 2H), 7.84 (d,  $J = 8.2$  Hz, 2H), 3.95 (s, 3H), 2.80 (s, 3H), 2.12 (s, 3H).  $^{13}\text{C}$  NMR (126 MHz,  $\text{CDCl}_3$ )  $\delta$  166.1, 134.4, 131.7, 129.9, 129.1 (d,  $J = 2.5$  Hz), 124.5 (q,  $J = 284.8$  Hz), 72.1 (q,  $J = 26.5$  Hz), 52.5, 38.9 (q,  $J = 2.5$  Hz), 16.0 (q,  $J = 3.8$  Hz).  $^{19}\text{F}$  NMR (471 MHz,  $\text{CDCl}_3$ )  $\delta$  -64.90. IR (neat): 3703, 2922, 1724, 1466, 1285, 957, 748, 712  $\text{cm}^{-1}$ . HRMS (ESI,  $m/z$ ) calcd for  $\text{C}_{12}\text{H}_{13}\text{F}_3\text{O}_4\text{S}$   $[\text{M}+\text{H}]^+$  311.0559, found 311.0551.

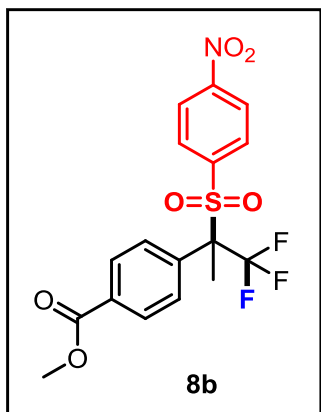

Yield: 94% (white solid, 39.2 mg, pet. ether/EtOAc = 1/1),  $^1\text{H}$  NMR (500 MHz,  $\text{CDCl}_3$ )  $\delta$  8.23 (d,  $J = 8.9$  Hz, 2H), 8.04 (d,  $J = 8.8$  Hz, 2H), 7.70 (d,  $J = 8.9$  Hz, 2H), 7.64 (d,  $J = 8.5$  Hz, 2H), 3.96 (s, 3H), 2.13 (s, 3H).  $^{13}\text{C}$  NMR (126 MHz,  $\text{CDCl}_3$ )  $\delta$  165.9, 151.1, 141.3, 133.7, 132.1, 131.9, 129.7, 129.4 (t,  $J = 2.5$  Hz), 124.2 (q,  $J = 286.0$  Hz), 73.9 (q,  $J = 26.5$  Hz), 52.6, 16.4 (d,  $J = 2.5$  Hz).  $^{19}\text{F}$  NMR (471 MHz,  $\text{CDCl}_3$ )  $\delta$  -63.82. IR (neat): 2920, 2852, 1719, 1530, 1447, 1278, 1164, 968, 857, 746  $\text{cm}^{-1}$ . HRMS (ESI,  $m/z$ ) calcd for  $\text{C}_{17}\text{H}_{14}\text{F}_3\text{NO}_6\text{S}$   $[\text{M}+\text{H}]^+$  418.0567, found 418.0565.

## 8. Supplementary spectra

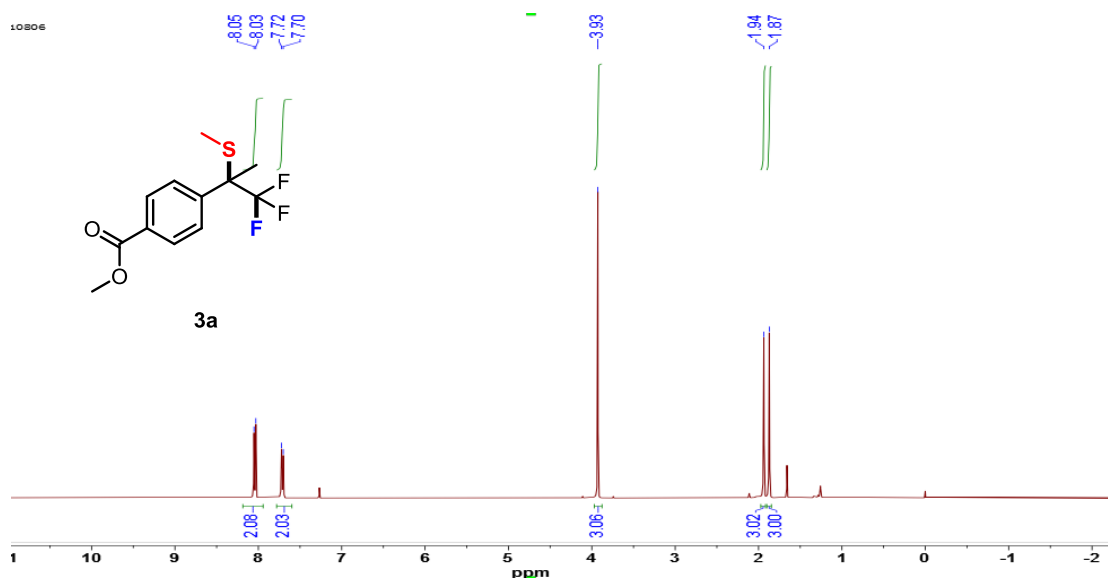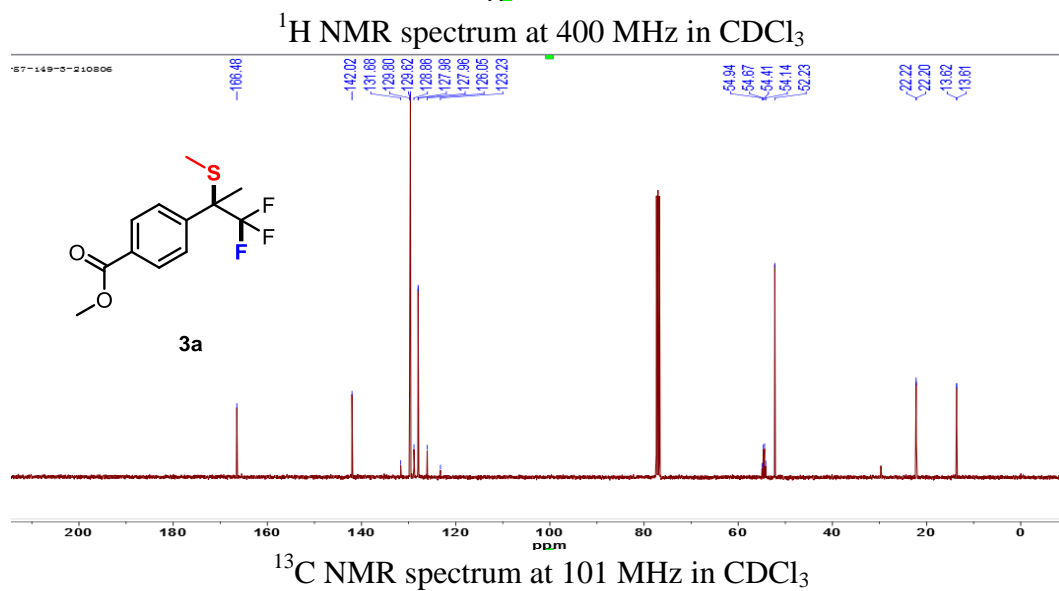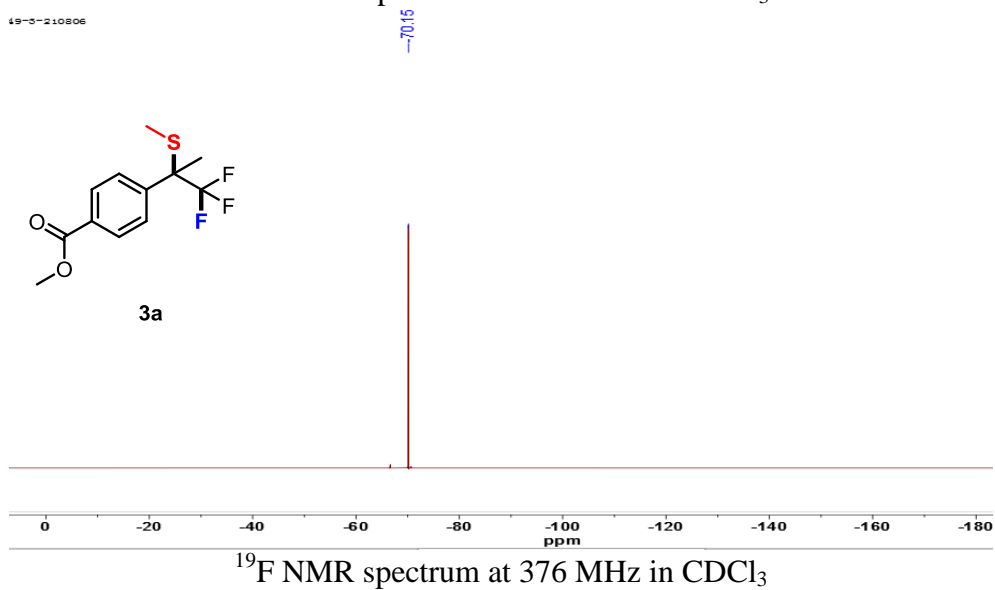

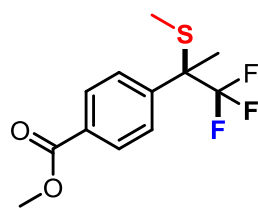

3a

Chemical Formula:  $C_{12}H_{13}F_3O_2S$

Exact Mass: 278.0588

Molecular Weight: 278.2892

m/z: 278.0588 (100.0%), 279.0622 (13.0%), 280.0546 (4.5%)

Elemental Analysis: C, 51.79; H, 4.71; F, 20.48; O, 11.50; S, 11.52

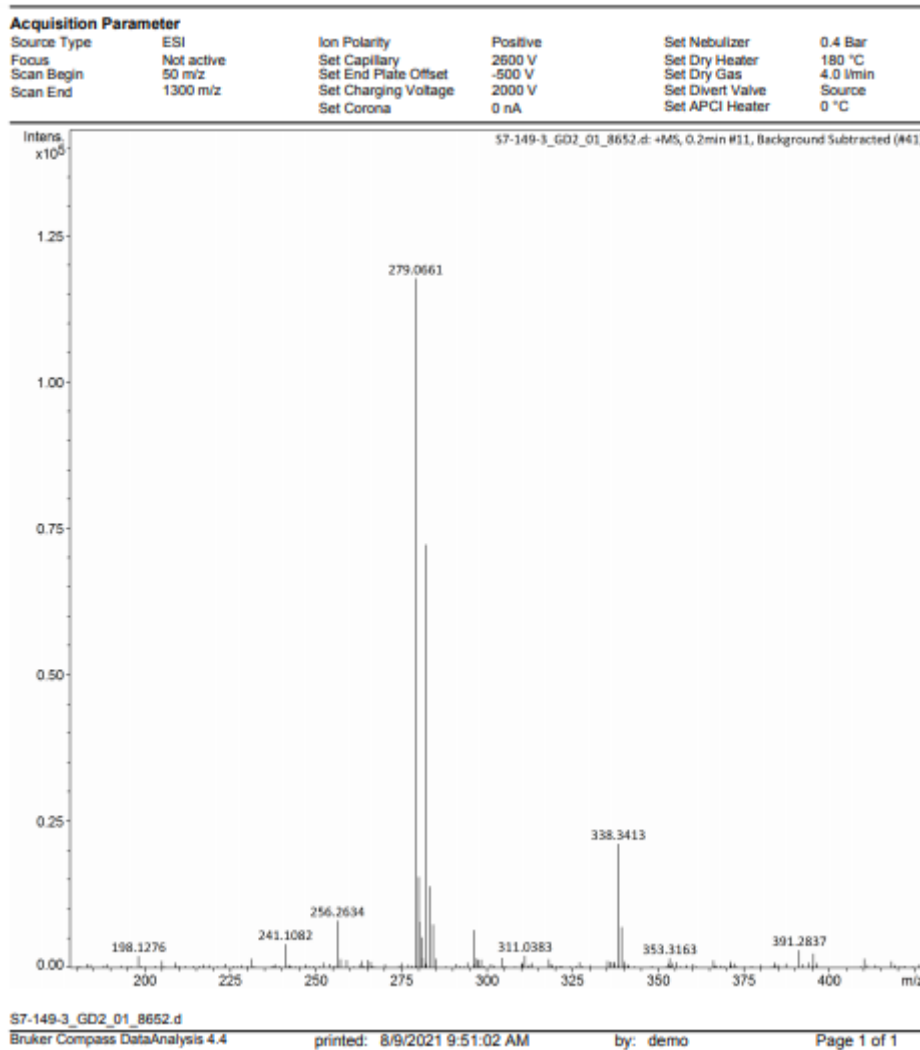

HRMS (ESI, m/z) calcd for  $C_{12}H_{13}F_3O_2S$   $[M+H]^+$  279.0661, found 279.0661.

17-210808.1.f1d  
17-210808

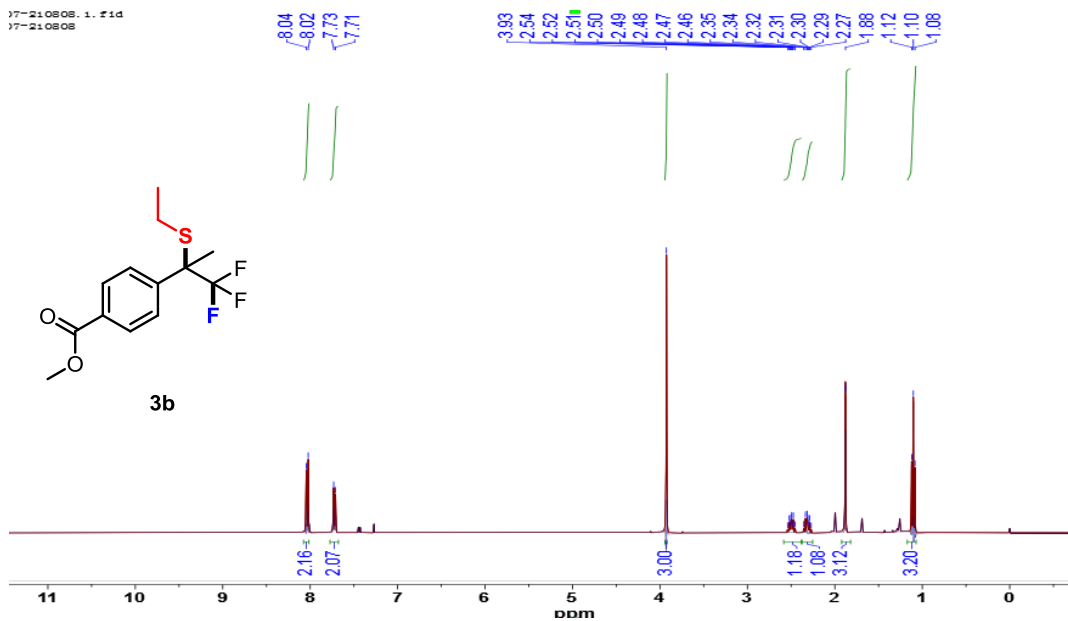

<sup>1</sup>H NMR spectrum at 400 MHz in CDCl<sub>3</sub>

17-162-0807-210808  
17-162-0807-210808

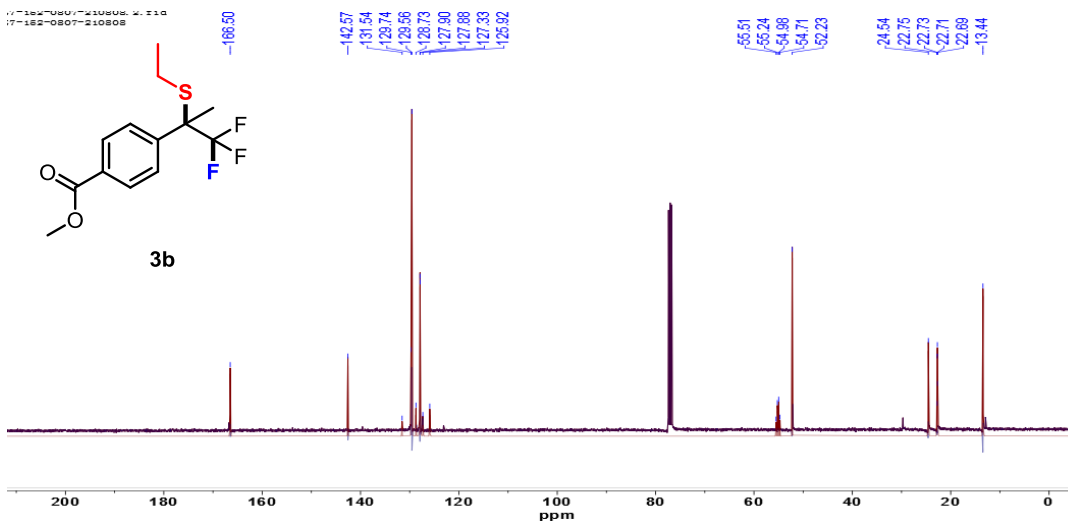

<sup>13</sup>C NMR spectrum at 101 MHz in CDCl<sub>3</sub>

1808.3.f1d  
1808

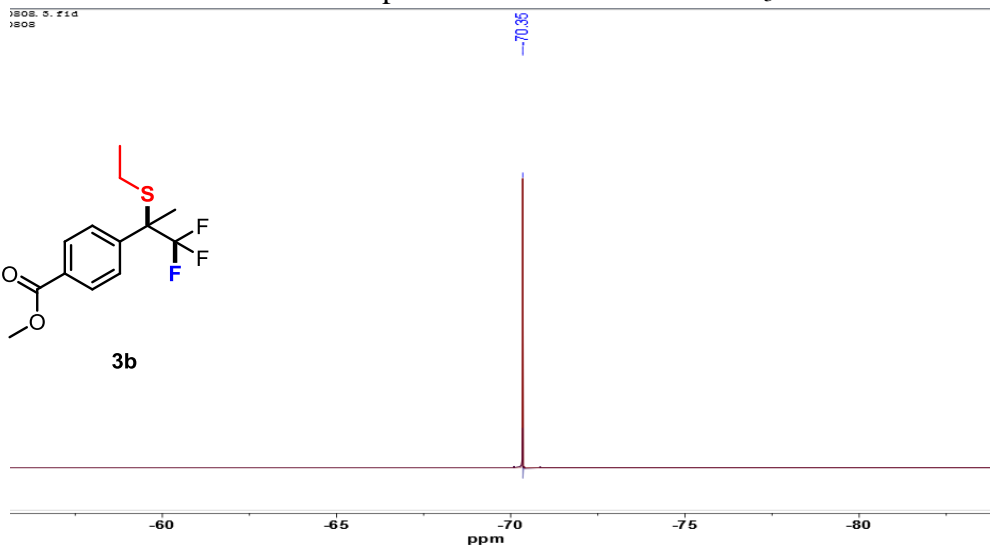

<sup>19</sup>F NMR spectrum at 376 MHz in CDCl<sub>3</sub>

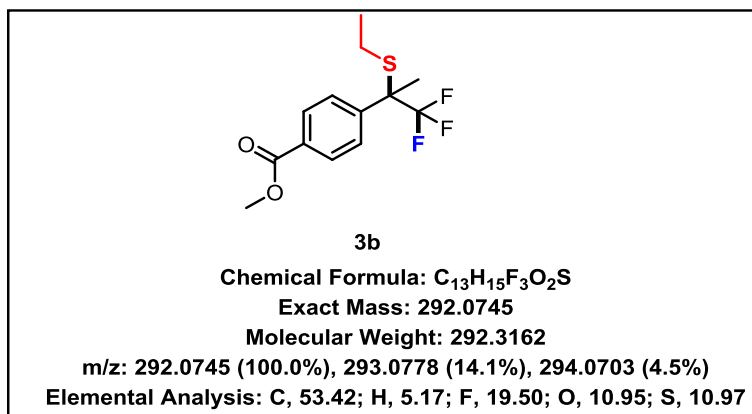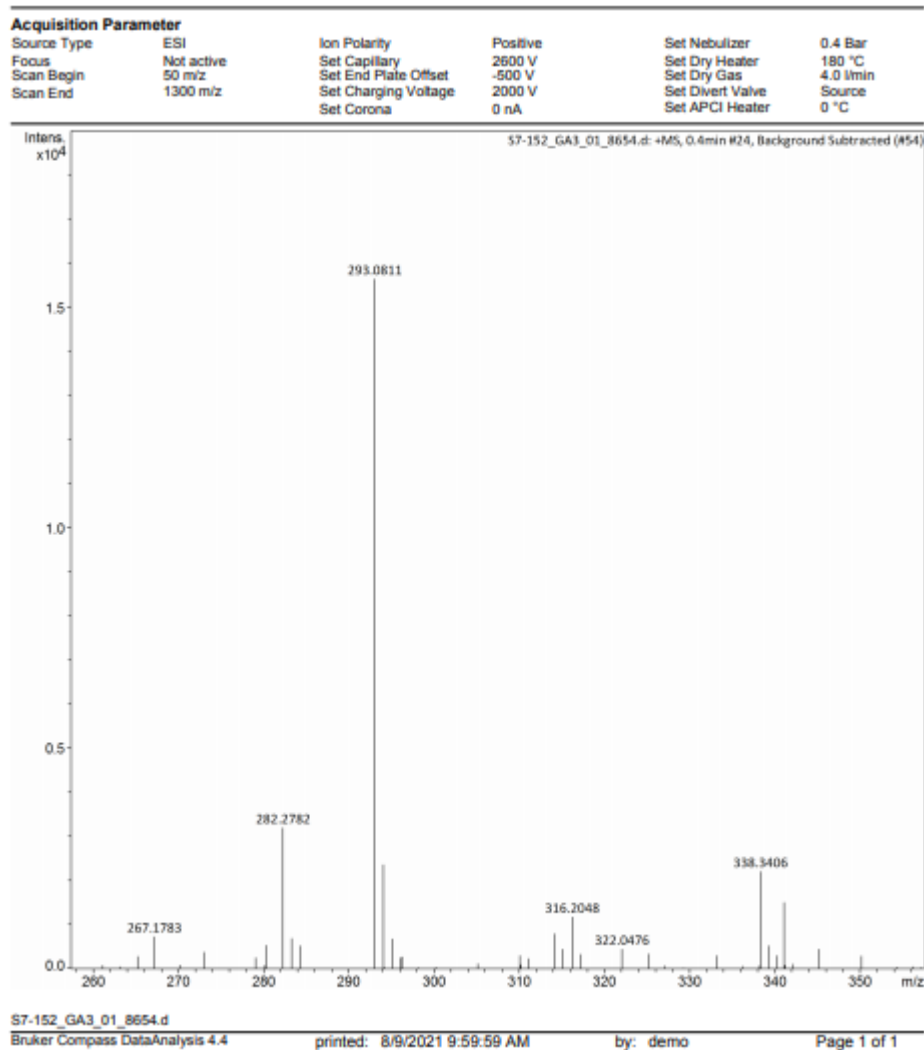

HRMS (ESI, m/z) calcd for C<sub>13</sub>H<sub>15</sub>F<sub>3</sub>O<sub>2</sub>S [M+H]<sup>+</sup> 293.0818, found 293.0811.

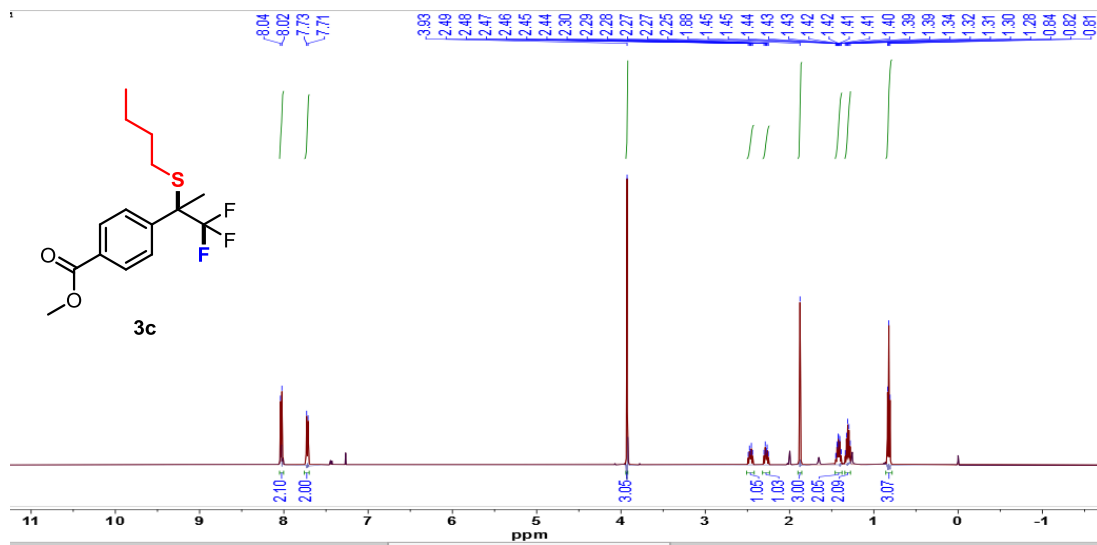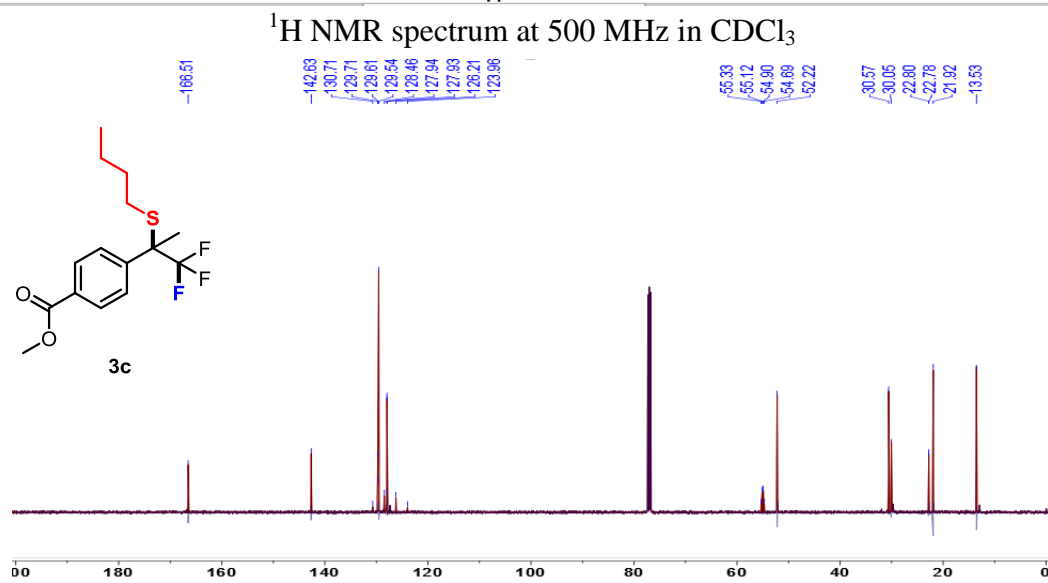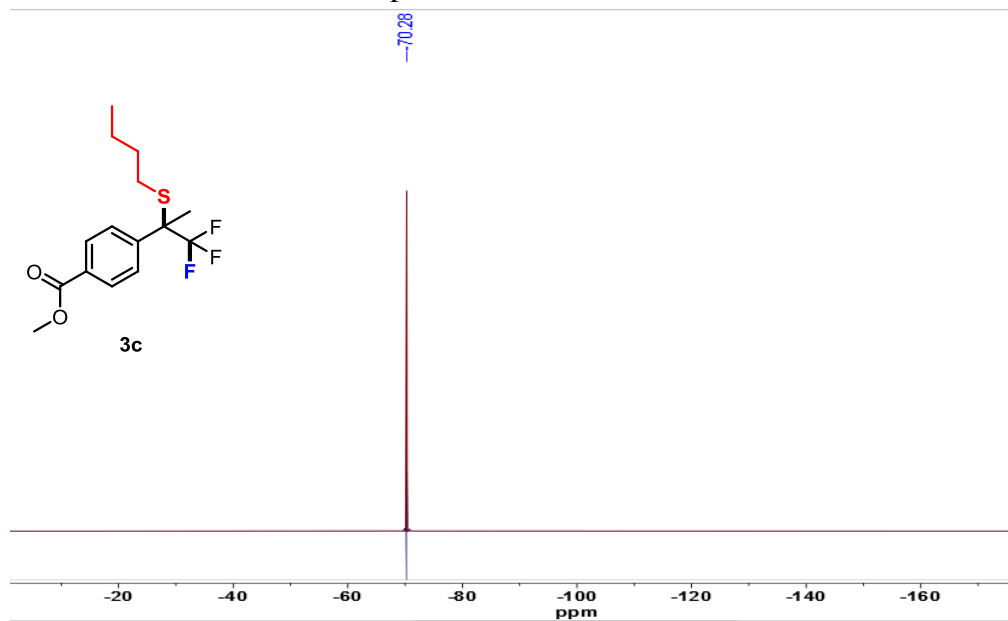



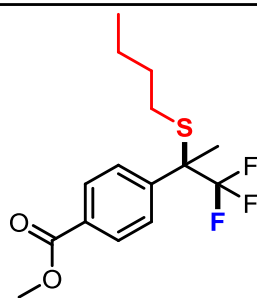

**3c**

**Chemical Formula: C<sub>15</sub>H<sub>19</sub>F<sub>3</sub>O<sub>2</sub>S**

**Exact Mass: 320.1058**

**Molecular Weight: 320.3702**

**m/z: 320.1058 (100.0%), 321.1091 (16.2%), 322.1016 (4.5%),  
322.1125 (1.2%)**

**Elemental Analysis: C, 56.24; H, 5.98; F, 17.79; O, 9.99; S,  
10.01**

**Acquisition Parameter**

|             |            |                      |          |                  |           |
|-------------|------------|----------------------|----------|------------------|-----------|
| Source Type | ESI        | Ion Polarity         | Positive | Set Nebulizer    | 0.4 Bar   |
| Focus       | Not active | Set Capillary        | 2600 V   | Set Dry Heater   | 180 °C    |
| Scan Begin  | 50 m/z     | Set End Plate Offset | -500 V   | Set Dry Gas      | 4.0 l/min |
| Scan End    | 3000 m/z   | Set Charging Voltage | 2000 V   | Set Divert Valve | Source    |
|             |            | Set Corona           | 0 nA     | Set APCI Heater  | 0 °C      |

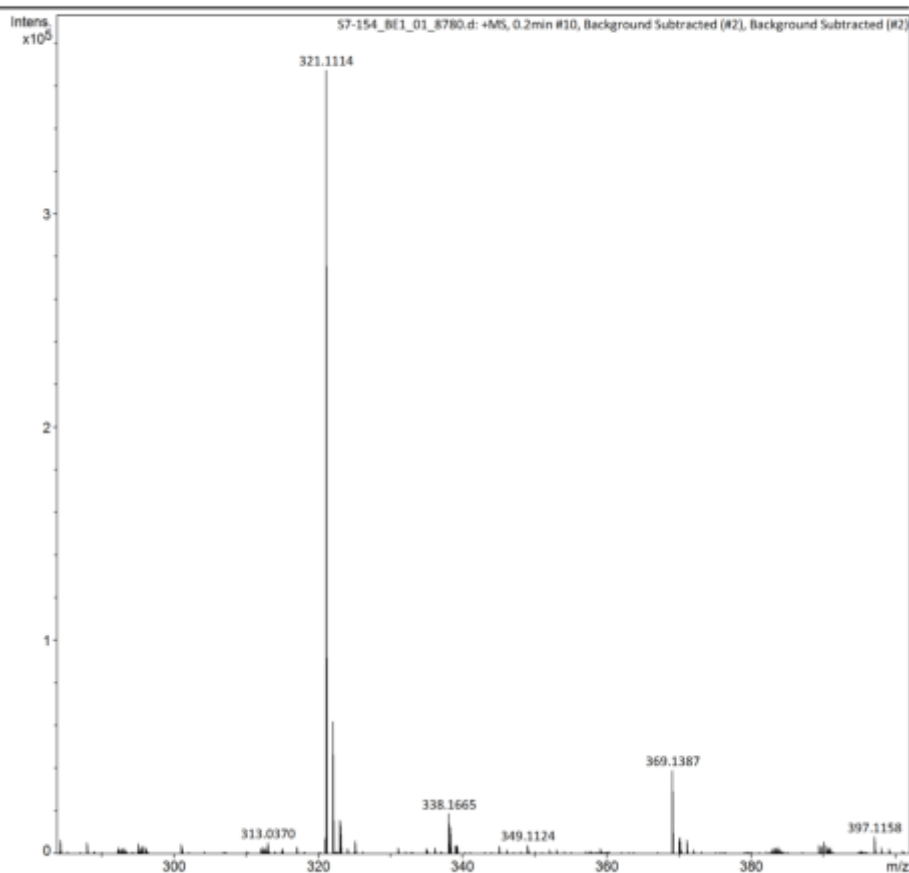

S7-154\_BE1\_01\_8780.d

Bruker Compass DataAnalysis 4.4

printed: 8/12/2021 10:25:43 AM

by: demo

Page 1 of 1

HRMS (ESI, m/z) calcd for C<sub>15</sub>H<sub>19</sub>F<sub>3</sub>O<sub>2</sub>S [M+H]<sup>+</sup> 321.1131, found 321.1114.

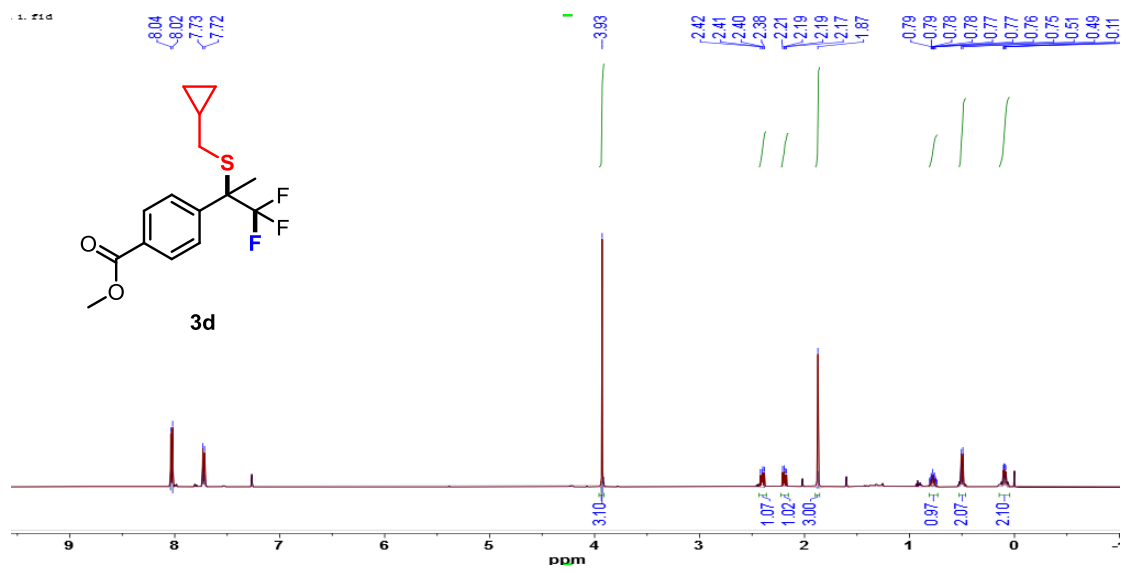

$^1\text{H}$  NMR spectrum at 500 MHz in  $\text{CDCl}_3$

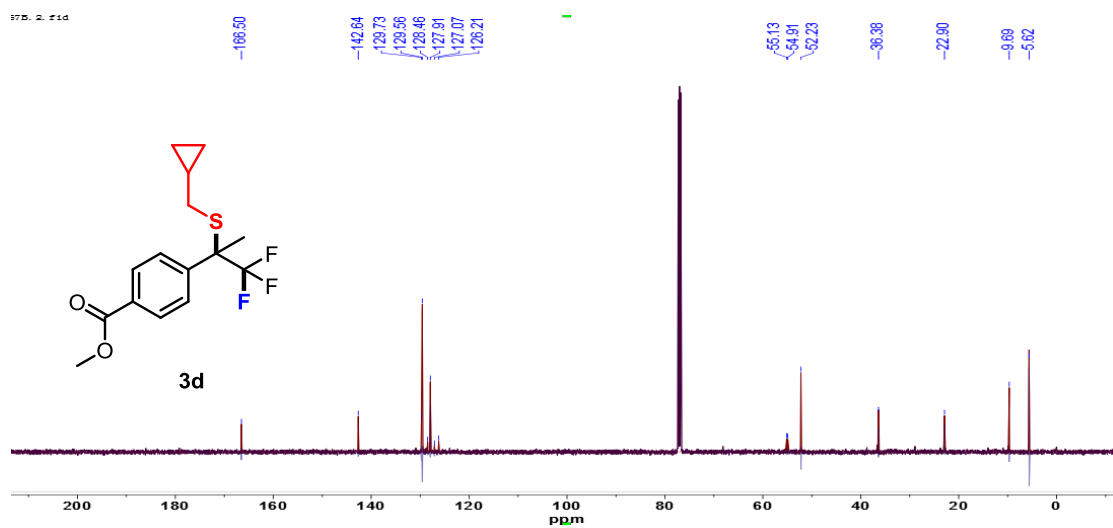

$^{13}\text{C}$  NMR spectrum at 126 MHz in  $\text{CDCl}_3$

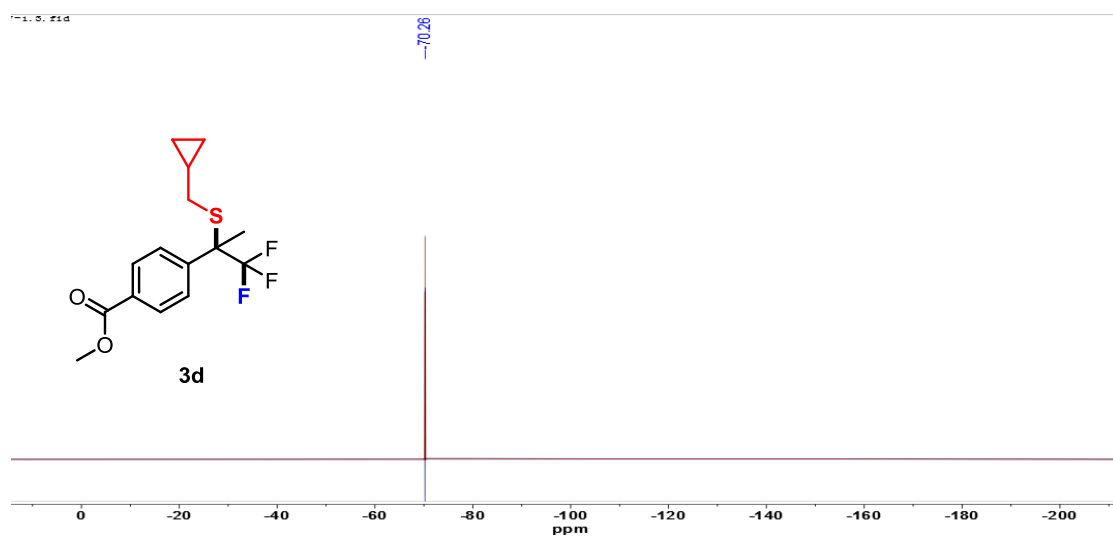

$^{19}\text{F}$  NMR spectrum at 471 MHz in  $\text{CDCl}_3$

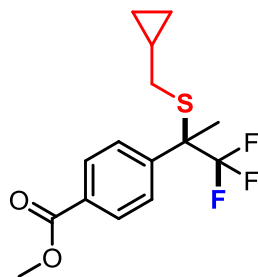

**3d**

Chemical Formula: C<sub>15</sub>H<sub>17</sub>F<sub>3</sub>O<sub>2</sub>S

Exact Mass: 318.0901

Molecular Weight: 318.3542

m/z: 318.0901 (100.0%), 319.0935 (16.2%), 320.0859 (4.5%),  
320.0968 (1.2%)

Elemental Analysis: C, 56.59; H, 5.38; F, 17.90; O, 10.05; S, 10.07

**Acquisition Parameter**

|             |            |                      |          |                  |           |
|-------------|------------|----------------------|----------|------------------|-----------|
| Source Type | ESI        | Ion Polarity         | Positive | Set Nebulizer    | 0.4 Bar   |
| Focus       | Not active | Set Capillary        | 2600 V   | Set Dry Heater   | 180 °C    |
| Scan Begin  | 50 m/z     | Set End Plate Offset | -500 V   | Set Dry Gas      | 4.0 l/min |
| Scan End    | 3000 m/z   | Set Charging Voltage | 2000 V   | Set Divert Valve | Source    |
|             |            | Set Corona           | 0 nA     | Set APCI Heater  | 0 °C      |

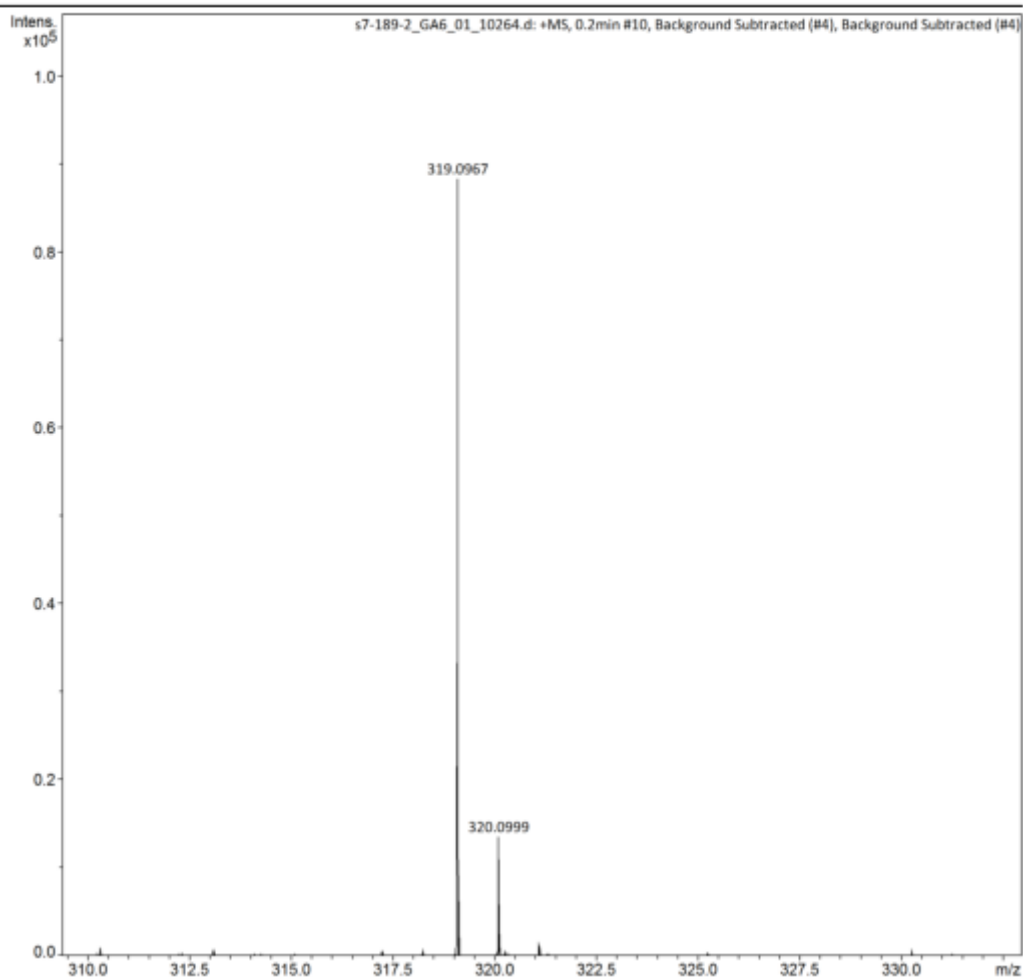

s7-189-2\_GA6\_01\_10264.d

HRMS (ESI, m/z) calcd for C<sub>15</sub>H<sub>17</sub>F<sub>3</sub>O<sub>2</sub>S [M+H]<sup>+</sup> 319.0974, found 319.0967.

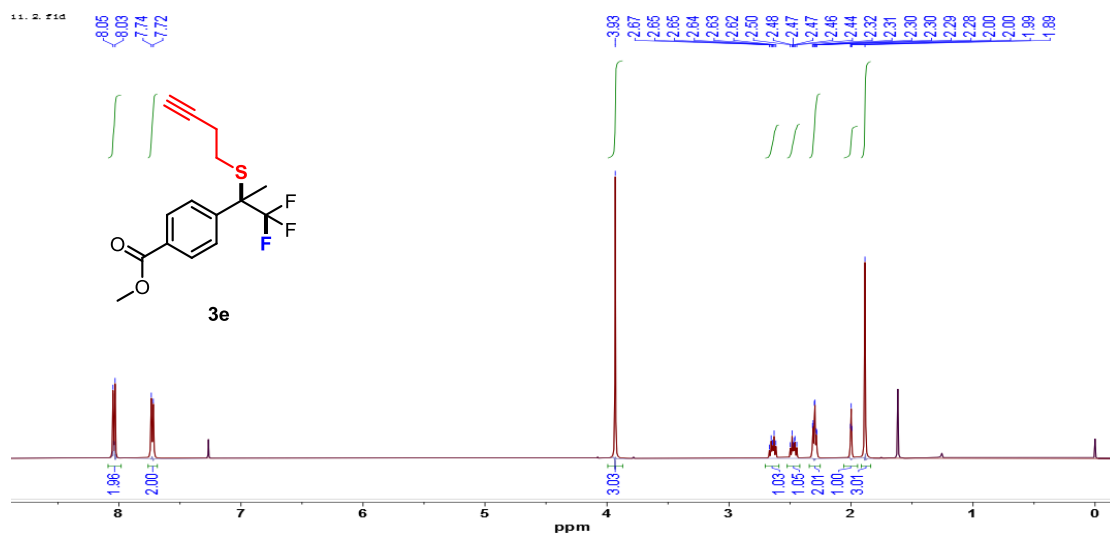

$^1\text{H}$  NMR spectrum at 500 MHz in  $\text{CDCl}_3$

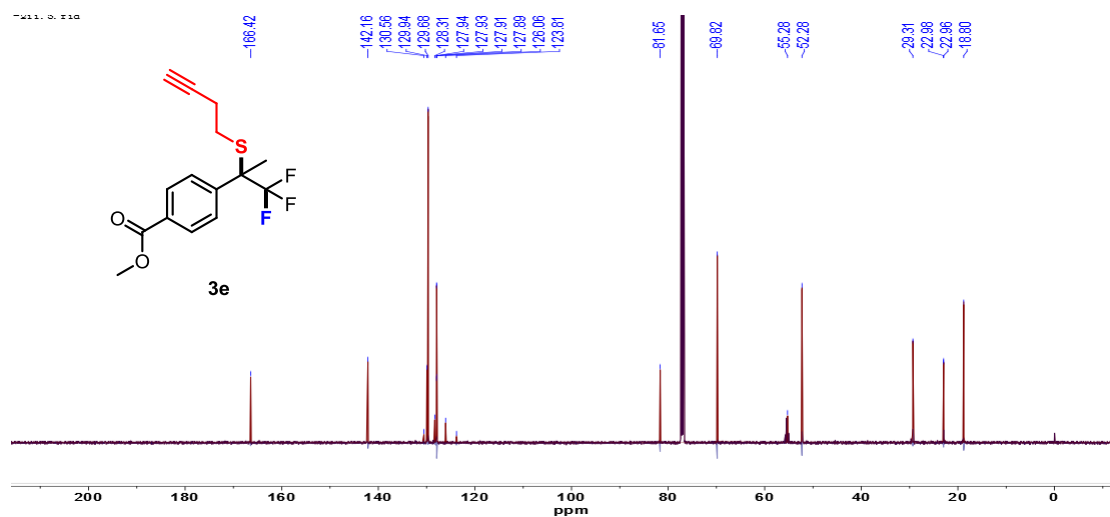

$^{13}\text{C}$  NMR spectrum at 126 MHz in  $\text{CDCl}_3$

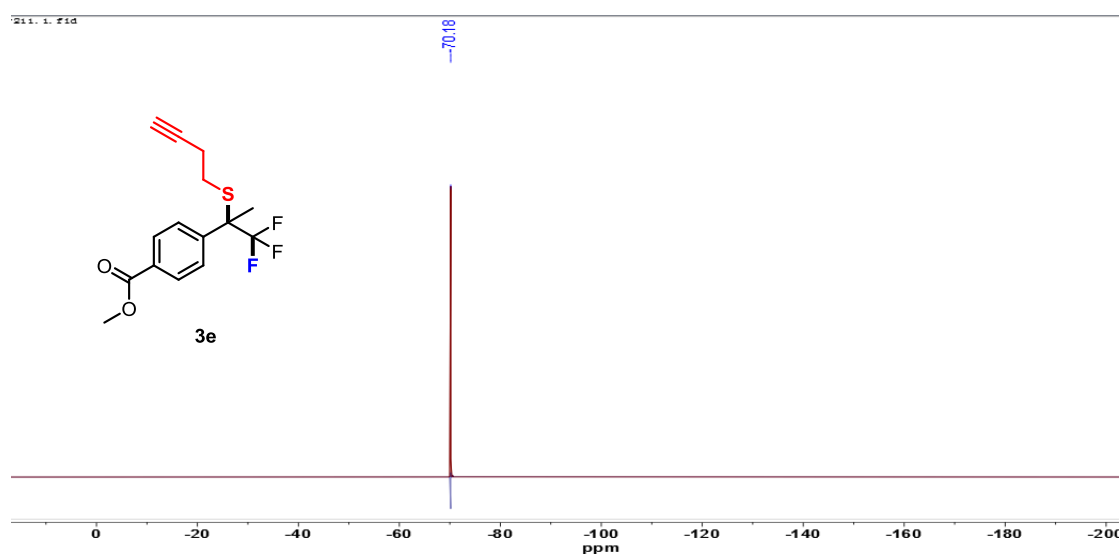

$^{19}\text{F}$  NMR spectrum at 471 MHz in  $\text{CDCl}_3$

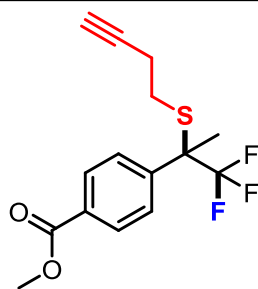

3e

Chemical Formula:  $C_{15}H_{15}F_3O_2S$

Exact Mass: 316.0745

Molecular Weight: 316.3382

m/z: 316.0745 (100.0%), 317.0778 (16.2%), 318.0703 (4.5%), 318.0812 (1.2%)

Elemental Analysis: C, 56.95; H, 4.78; F, 18.02; O, 10.12; S, 10.13

$CDCl_3$

Acquisition Parameter

|             |            |                      |          |                  |           |
|-------------|------------|----------------------|----------|------------------|-----------|
| Source Type | ESI        | Ion Polarity         | Positive | Set Nebulizer    | 0.4 Bar   |
| Focus       | Not active | Set Capillary        | 2600 V   | Set Dry Heater   | 180 °C    |
| Scan Begin  | 50 m/z     | Set End Plate Offset | -500 V   | Set Dry Gas      | 4.0 l/min |
| Scan End    | 3000 m/z   | Set Charging Voltage | 2000 V   | Set Divert Valve | Source    |
|             |            | Set Corona           | 0 nA     | Set APCI Heater  | 0 °C      |

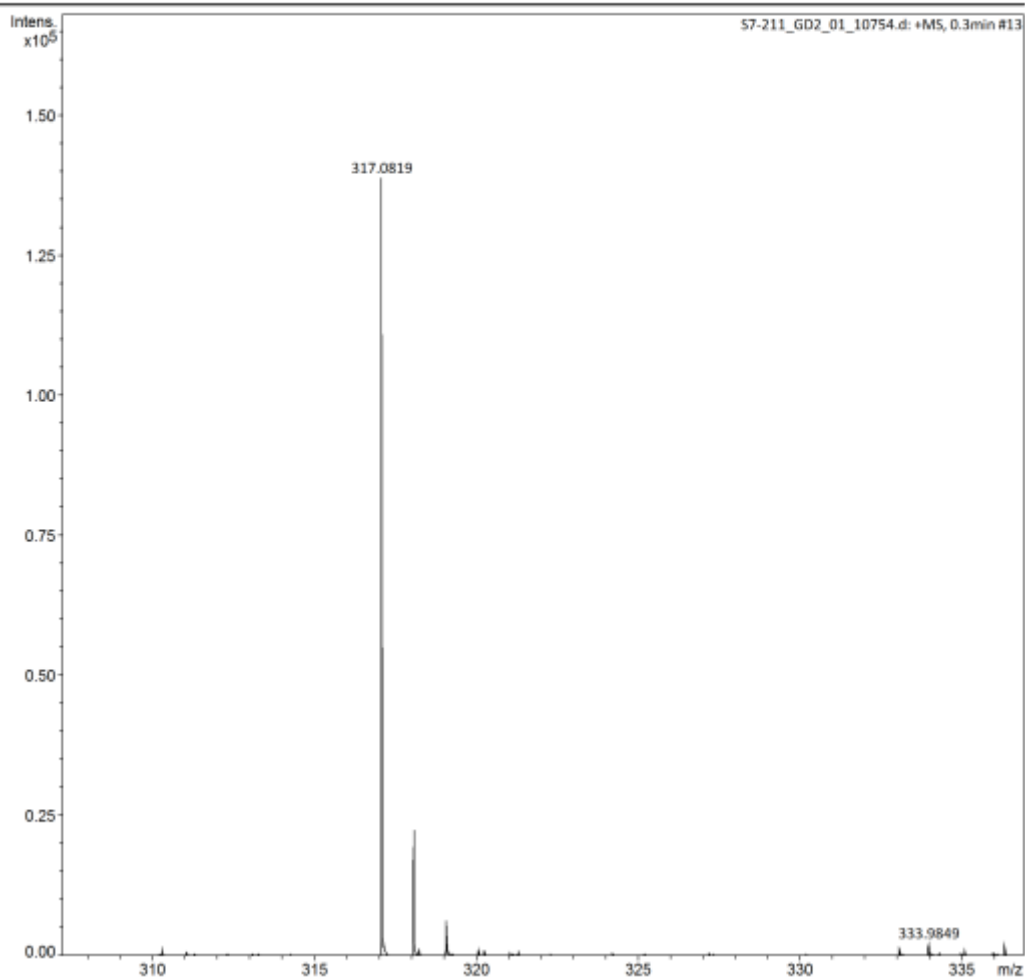

S7-211\_GD2\_01\_10754.d

HRMS (ESI, m/z) calcd for  $C_{15}H_{15}F_3O_2S$   $[M+H]^+$  317.0818, found 317.0819.

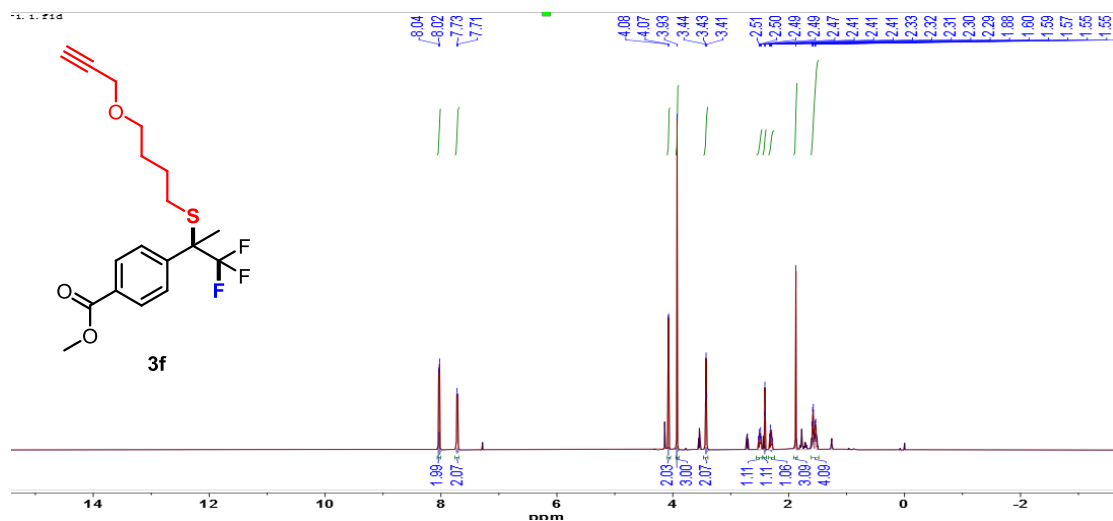

**<sup>1</sup>H NMR spectrum at 500 MHz in CDCl<sub>3</sub>**

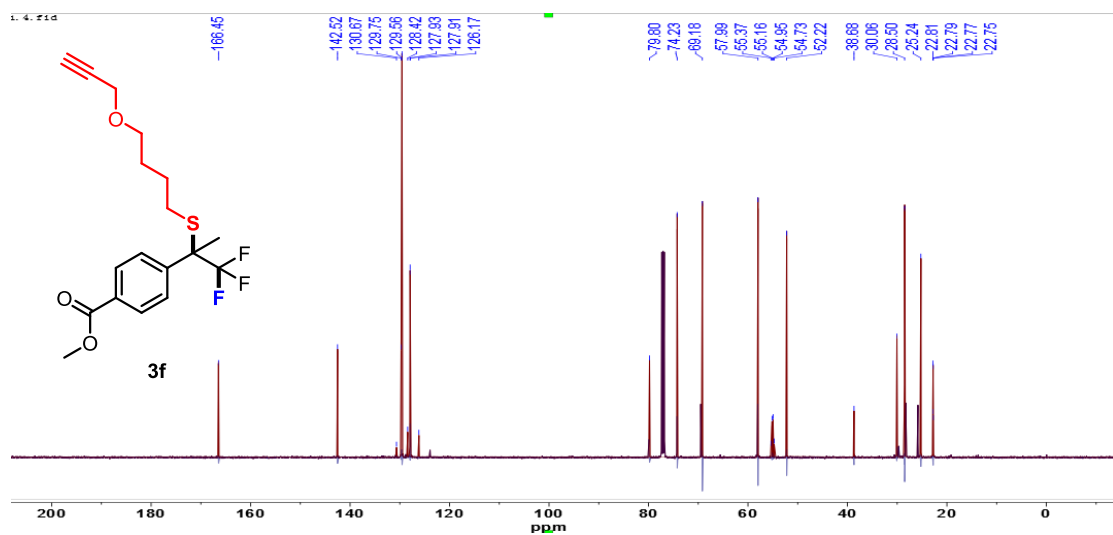

**<sup>13</sup>C NMR spectrum at 126 MHz in CDCl<sub>3</sub>**

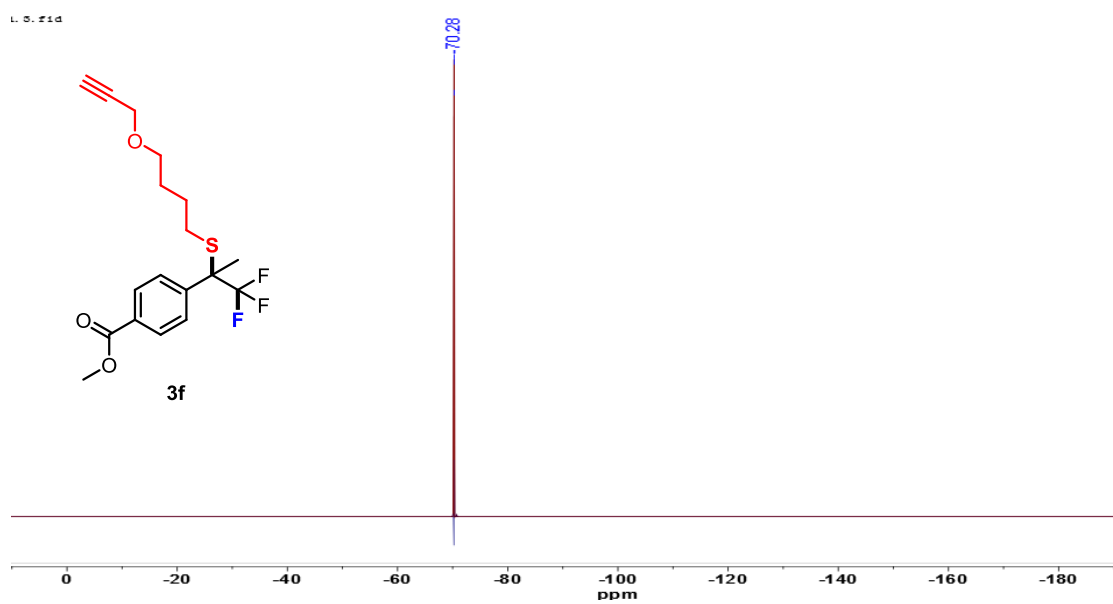

**<sup>19</sup>F NMR spectrum at 471 MHz in CDCl<sub>3</sub>**

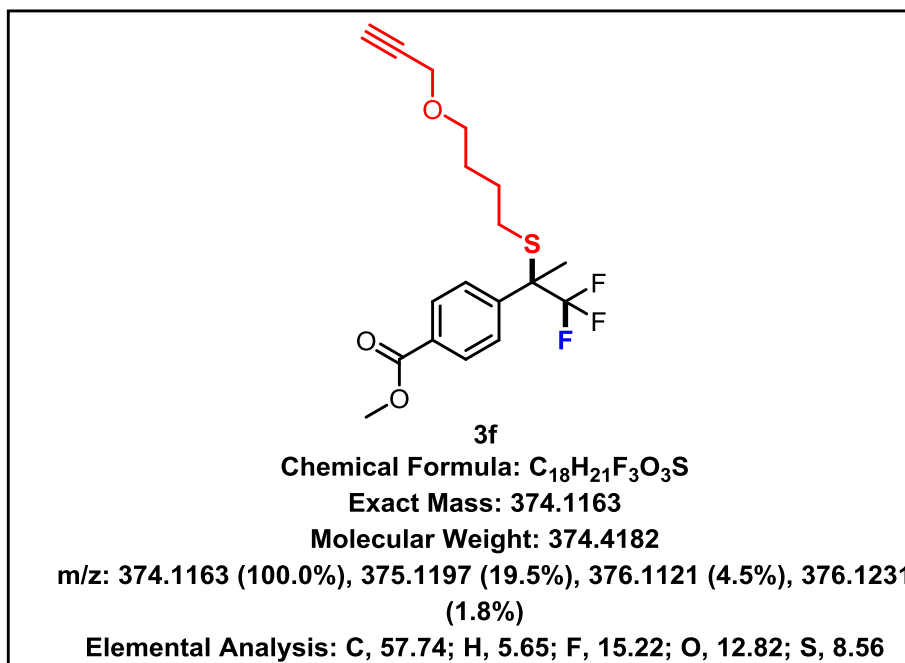

|             |            |                      |          |                  |           |
|-------------|------------|----------------------|----------|------------------|-----------|
| Source Type | ESI        | Ion Polarity         | Positive | Set Nebulizer    | 0.4 Bar   |
| Focus       | Not active | Set Capillary        | 2600 V   | Set Dry Heater   | 180 °C    |
| Scan Begin  | 50 m/z     | Set End Plate Offset | -500 V   | Set Dry Gas      | 4.0 l/min |
| Scan End    | 3000 m/z   | Set Charging Voltage | 2000 V   | Set Divert Valve | Source    |
|             |            | Set Corona           | 0 nA     | Set APCI Heater  | 0 °C      |

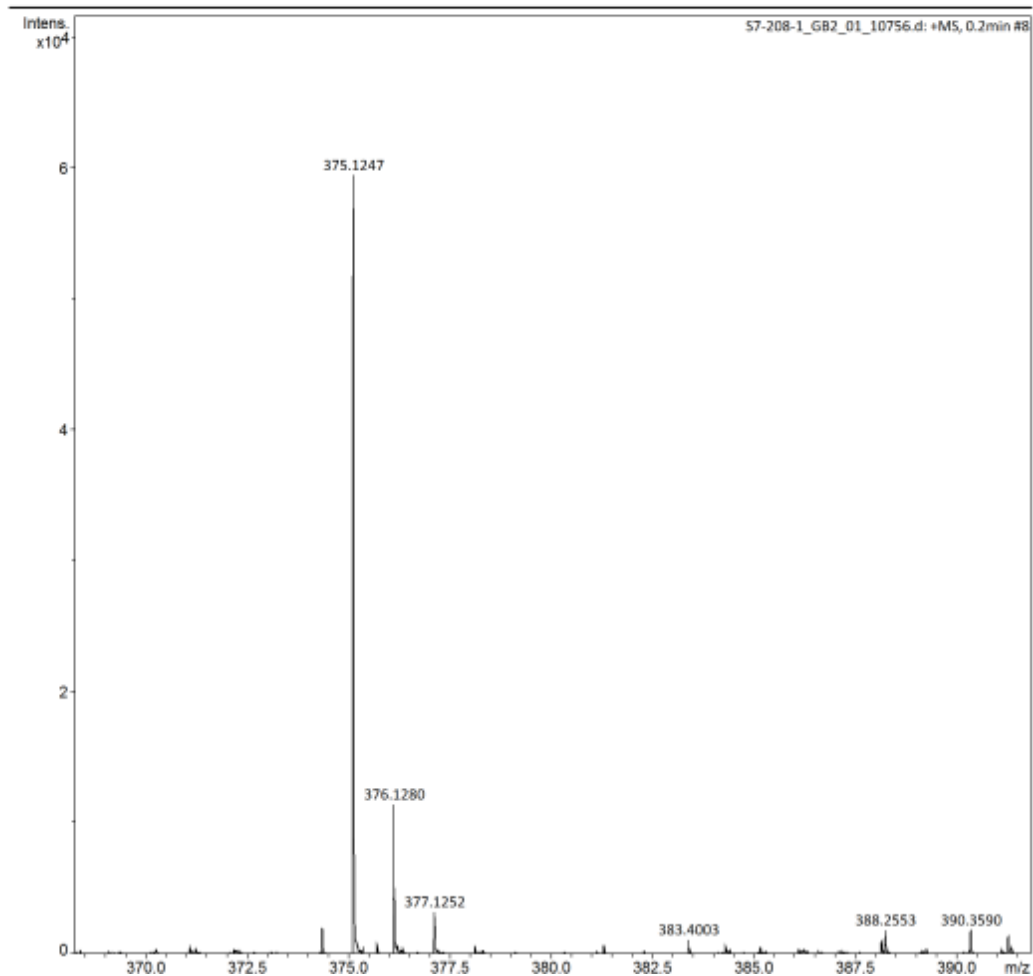

HRMS (ESI, m/z) calcd for C<sub>18</sub>H<sub>21</sub>F<sub>3</sub>O<sub>3</sub>S [M+H]<sup>+</sup> 375.1236, found 375.1247.

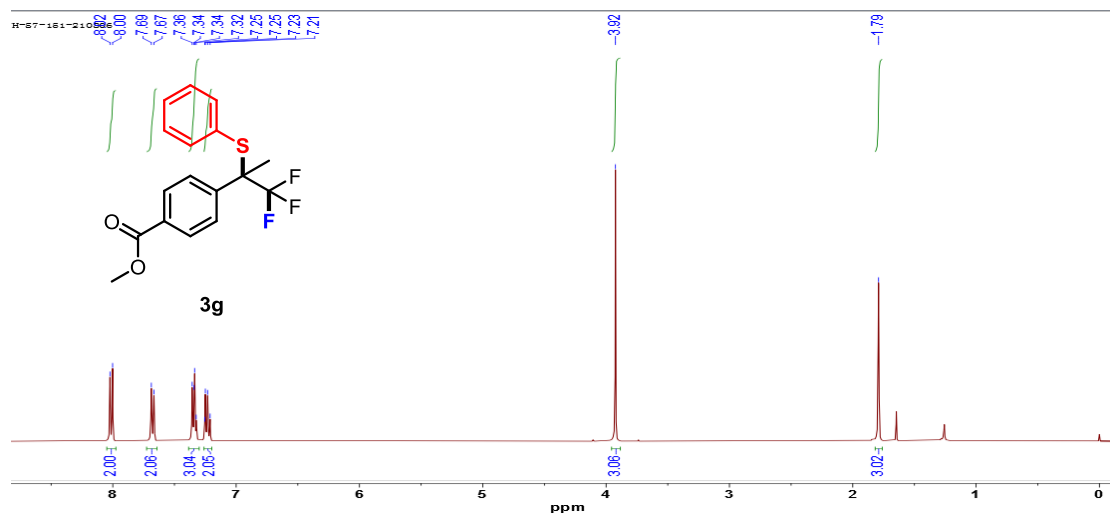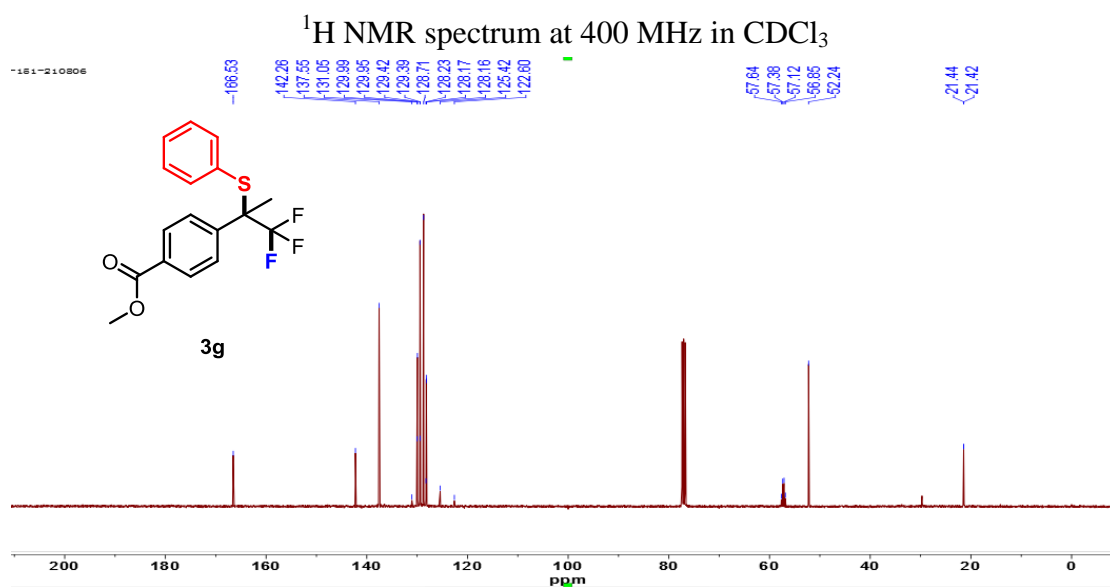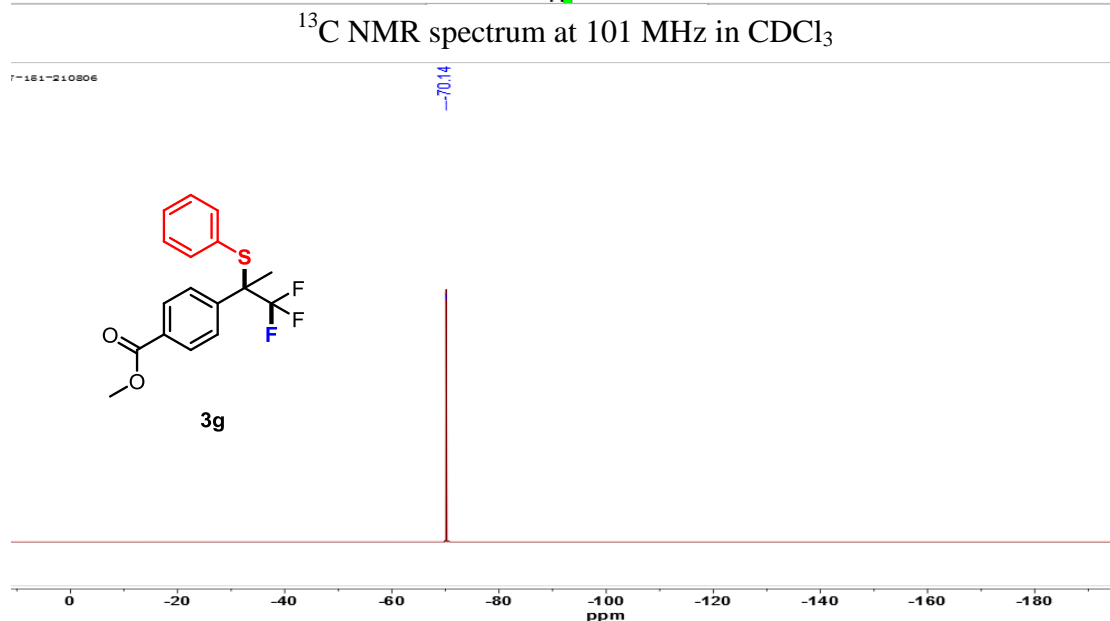



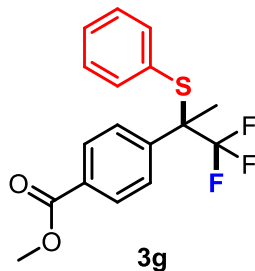

3g

Chemical Formula:  $C_{17}H_{15}F_3O_2S$

Exact Mass: 340.0745

Molecular Weight: 340.3602

m/z: 340.0745 (100.0%), 341.0778 (18.4%), 342.0703 (4.5%), 342.0812 (1.6%)

Elemental Analysis: C, 59.99; H, 4.44; F, 16.75; O, 9.40; S, 9.42

Acquisition Parameter

|             |            |                      |          |                  |           |
|-------------|------------|----------------------|----------|------------------|-----------|
| Source Type | ESI        | Ion Polarity         | Positive | Set Nebulizer    | 0.4 Bar   |
| Focus       | Not active | Set Capillary        | 2600 V   | Set Dry Heater   | 180 °C    |
| Scan Begin  | 50 m/z     | Set End Plate Offset | -500 V   | Set Dry Gas      | 4.0 l/min |
| Scan End    | 1300 m/z   | Set Charging Voltage | 2000 V   | Set Divert Valve | Source    |
|             |            | Set Corona           | 0 nA     | Set APCI Heater  | 0 °C      |

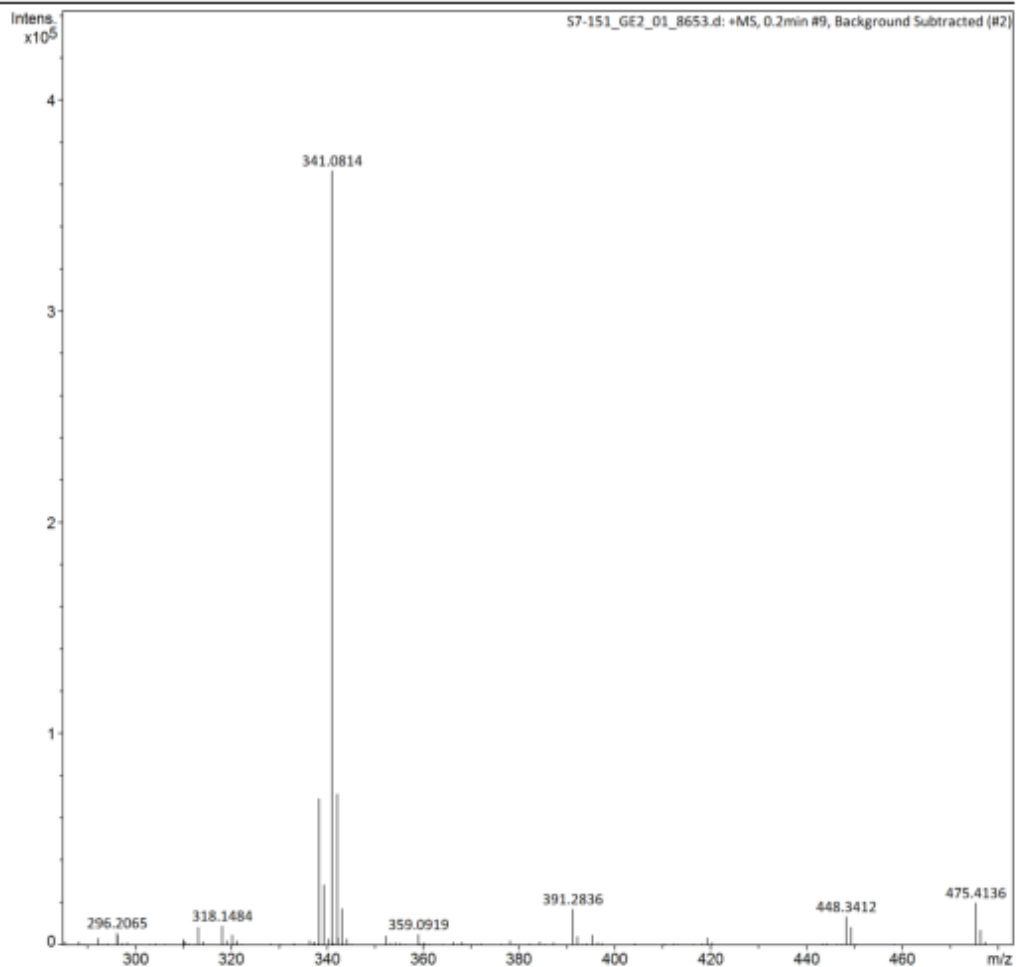

S7-151\_GE2\_01\_8653.d

HRMS (ESI, m/z) calcd for  $C_{17}H_{15}F_3O_2S$   $[M+H]^+$  341.0818, found 341.0814.

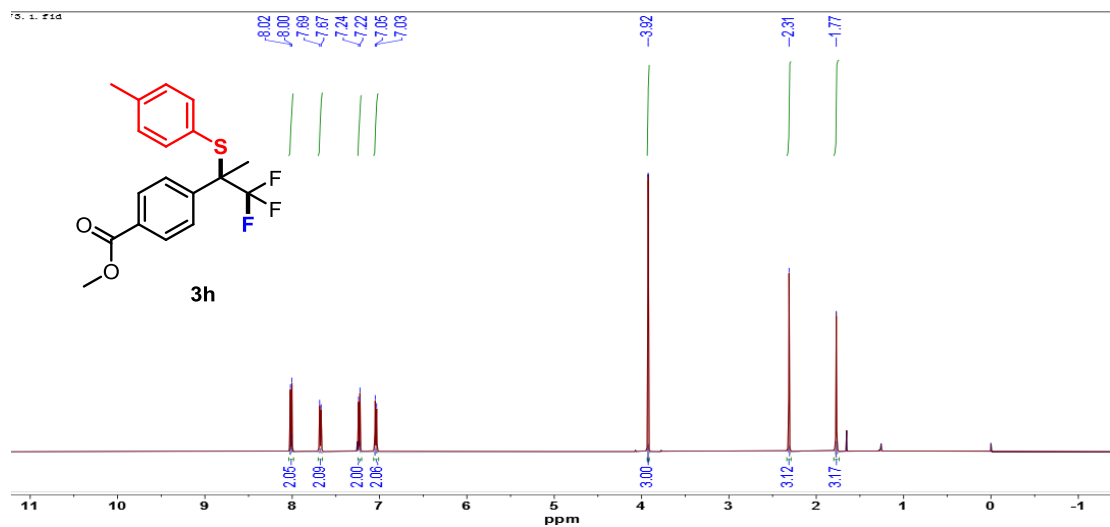

<sup>1</sup>H NMR spectrum at 500 MHz in CDCl<sub>3</sub>

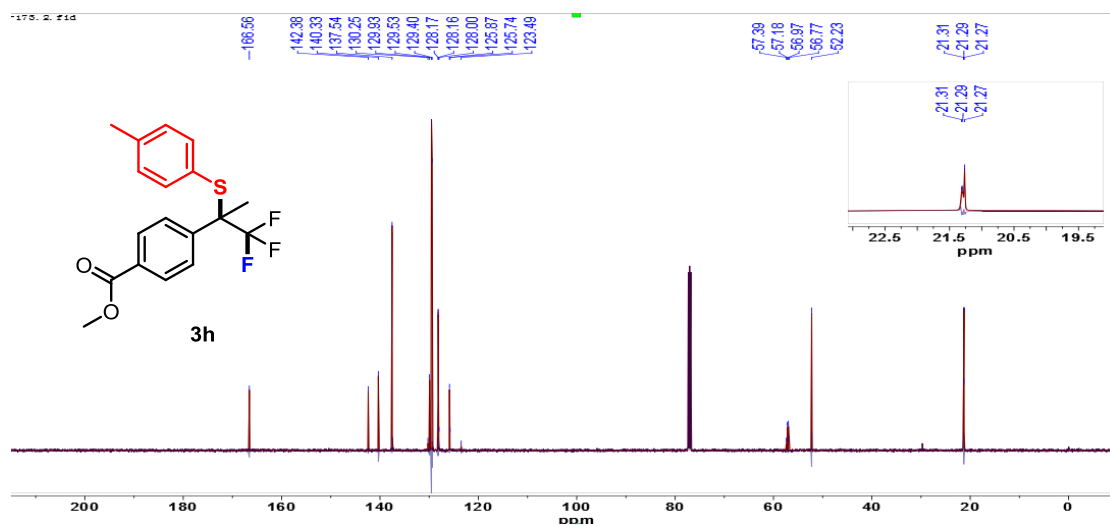

<sup>13</sup>C NMR spectrum at 126 MHz in CDCl<sub>3</sub>

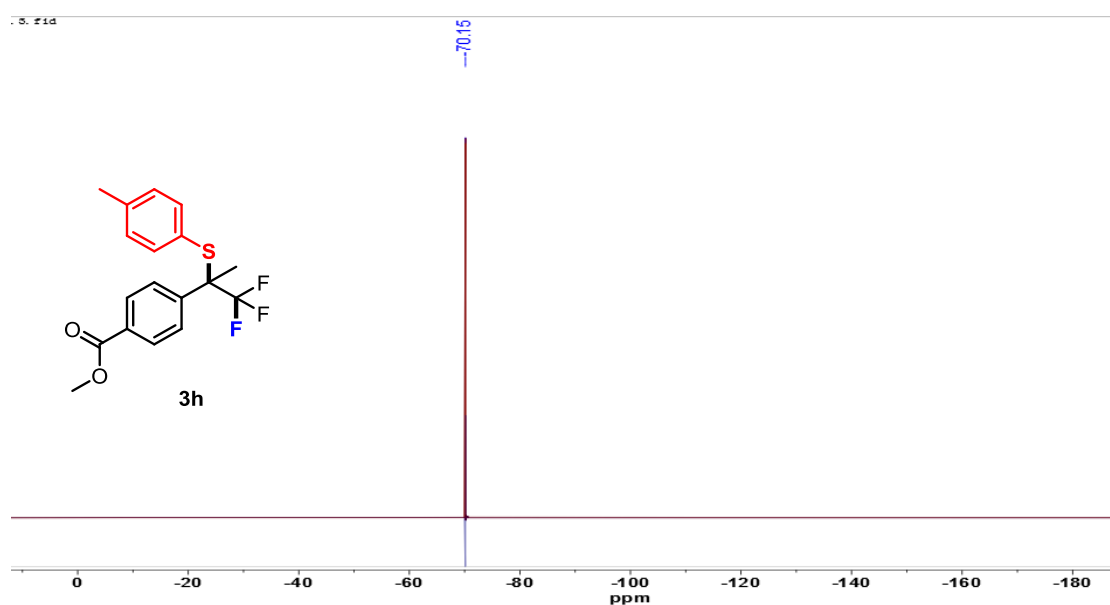

<sup>19</sup>F NMR spectrum at 471 MHz in CDCl<sub>3</sub>

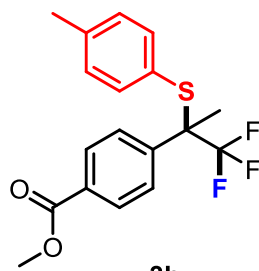

3h

Chemical Formula:  $C_{18}H_{17}F_3O_2S$

Exact Mass: 354.0901

Molecular Weight: 354.3872

m/z: 354.0901 (100.0%), 355.0935 (19.5%), 356.0859 (4.5%), 356.0968 (1.8%)

Elemental Analysis: C, 61.01; H, 4.84; F, 16.08; O, 9.03; S, 9.05

Acquisition Parameter

|             |            |                      |          |                  |           |
|-------------|------------|----------------------|----------|------------------|-----------|
| Source Type | ESI        | Ion Polarity         | Positive | Set Nebulizer    | 0.4 Bar   |
| Focus       | Not active | Set Capillary        | 2600 V   | Set Dry Heater   | 180 °C    |
| Scan Begin  | 50 m/z     | Set End Plate Offset | -500 V   | Set Dry Gas      | 4.0 l/min |
| Scan End    | 3000 m/z   | Set Charging Voltage | 2000 V   | Set Divert Valve | Source    |
|             |            | Set Corona           | 0 nA     | Set APCI Heater  | 0 °C      |

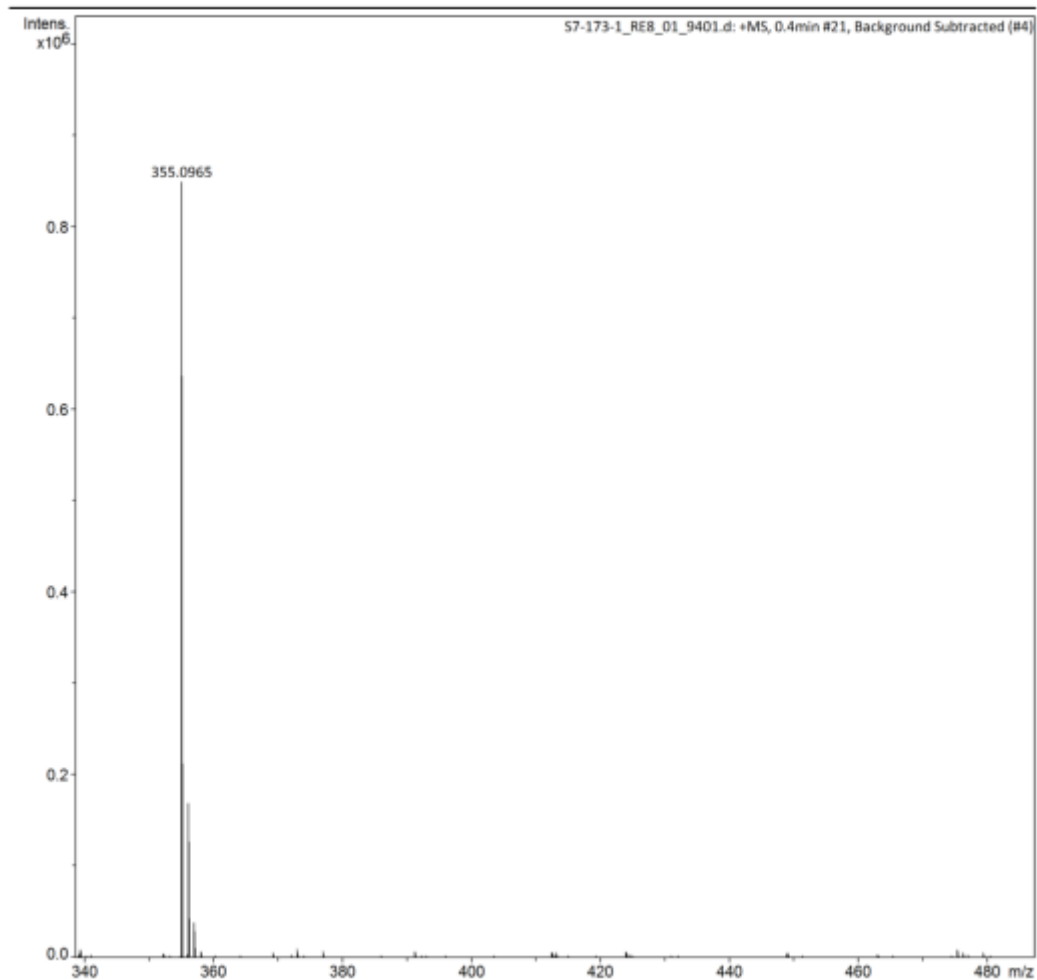

S7-173-1\_RE8\_01\_9401.d

HRMS (ESI, m/z) calcd for  $C_{18}H_{17}F_3O_2S$   $[M+H]^+$  355.0974, found 355.0965.

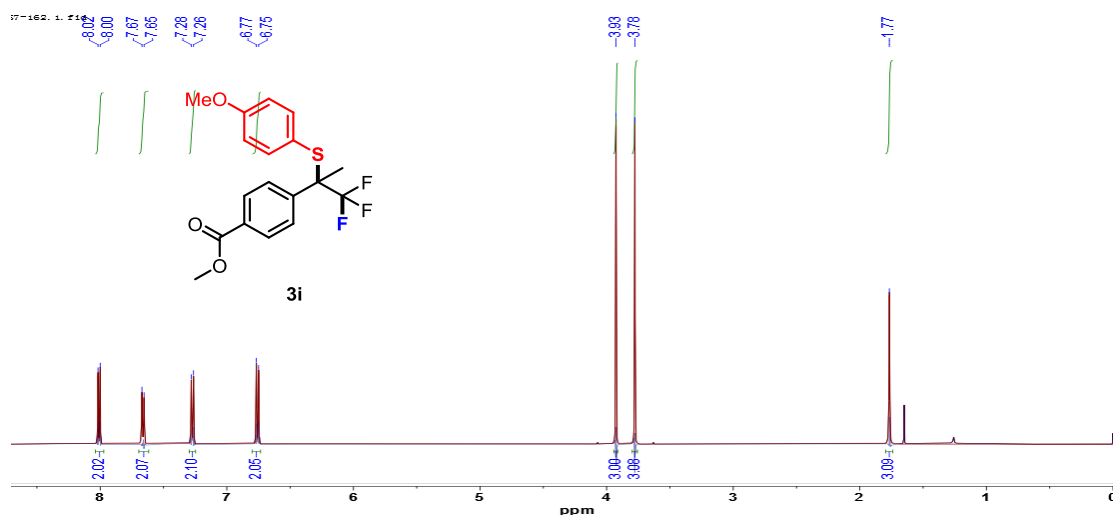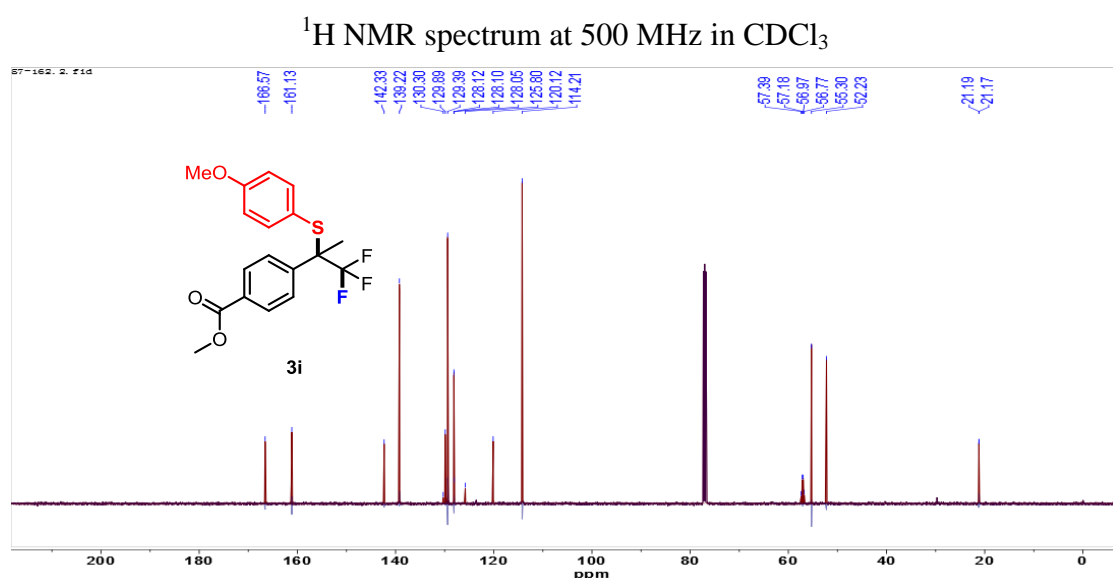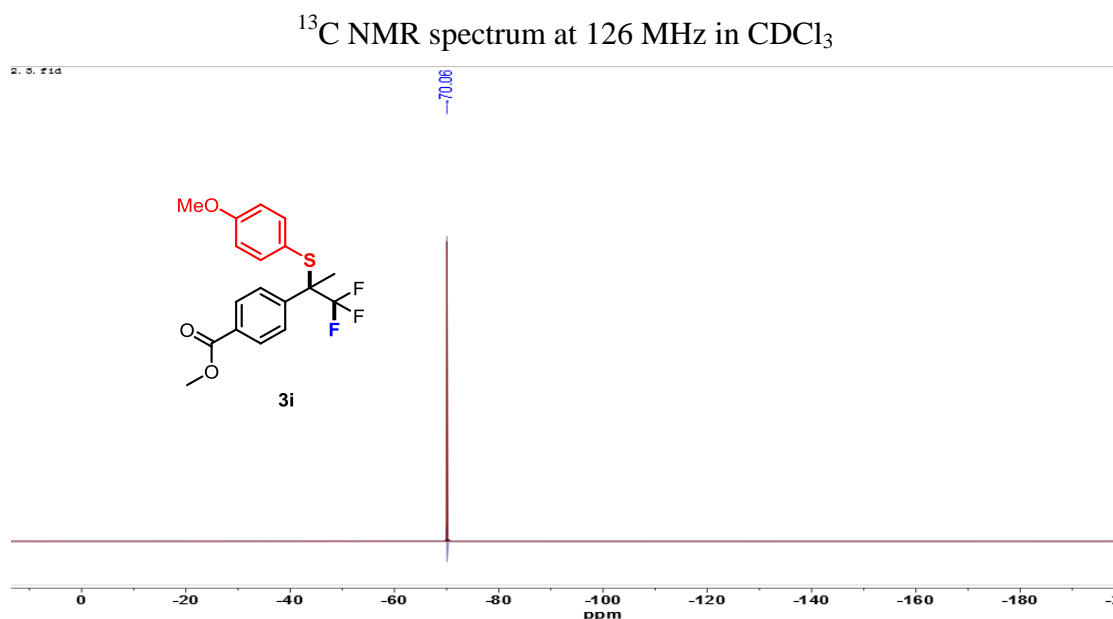

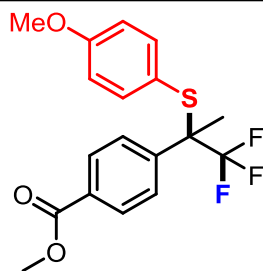

3i

Chemical Formula:  $C_{18}H_{17}F_3O_3S$

Exact Mass: 370.0850

Molecular Weight: 370.3862

m/z: 370.0850 (100.0%), 371.0884 (19.5%), 372.0808 (4.5%), 372.0918 (1.8%)

Elemental Analysis: C, 58.37; H, 4.63; F, 15.39; O, 12.96; S, 8.66

Acquisition Parameter

|             |            |                      |          |                  |           |
|-------------|------------|----------------------|----------|------------------|-----------|
| Source Type | ESI        | Ion Polarity         | Positive | Set Nebulizer    | 0.4 Bar   |
| Focus       | Not active | Set Capillary        | 2600 V   | Set Dry Heater   | 180 °C    |
| Scan Begin  | 50 m/z     | Set End Plate Offset | -500 V   | Set Dry Gas      | 4.0 l/min |
| Scan End    | 3000 m/z   | Set Charging Voltage | 2000 V   | Set Divert Valve | Source    |
|             |            | Set Corona           | 0 nA     | Set APCI Heater  | 0 °C      |

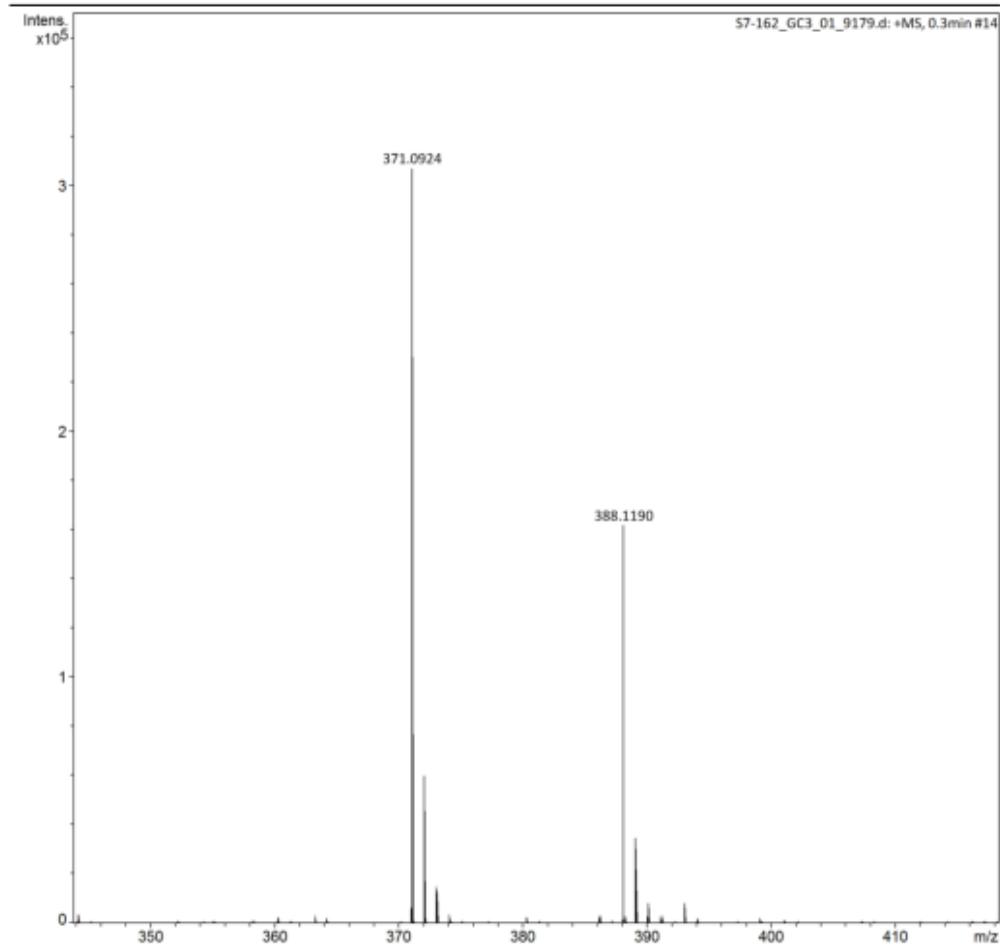

S7-162\_GC3\_01\_9179.d

HRMS (ESI, m/z) calcd for  $C_{18}H_{17}F_3O_3S$   $[M+H]^+$  371.0923, found 371.0924.

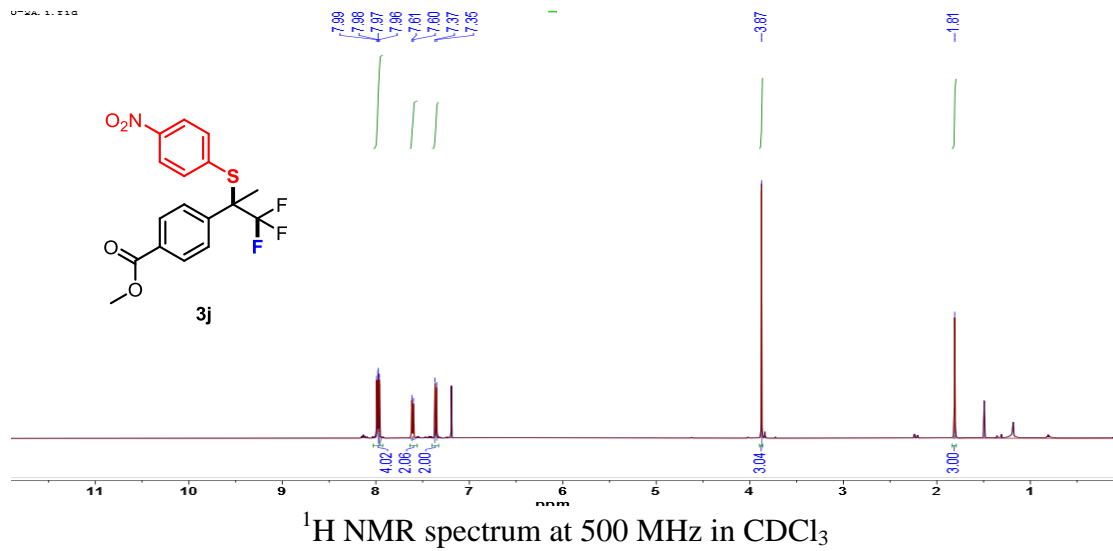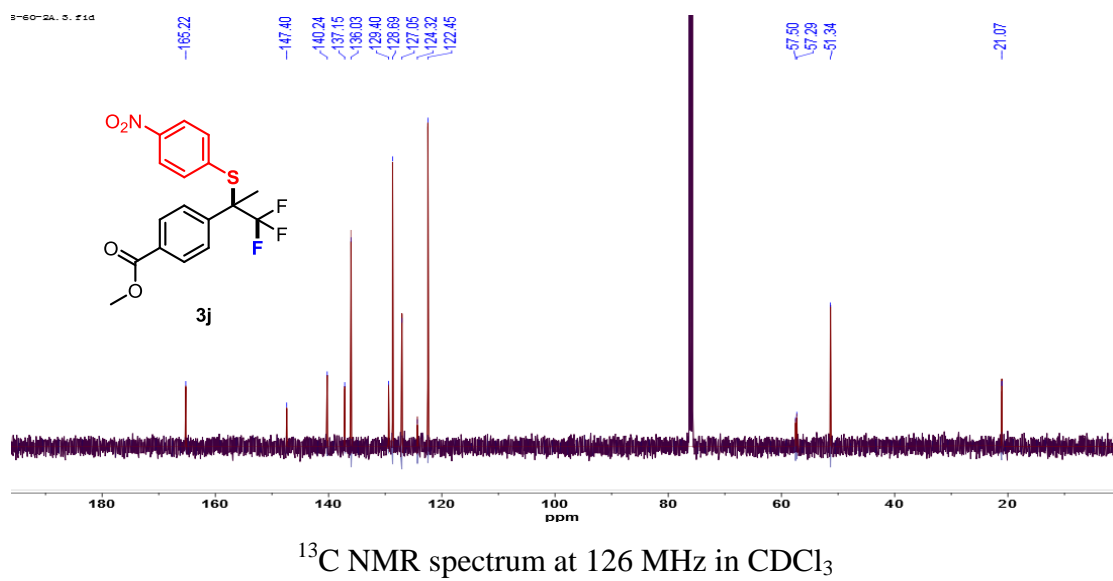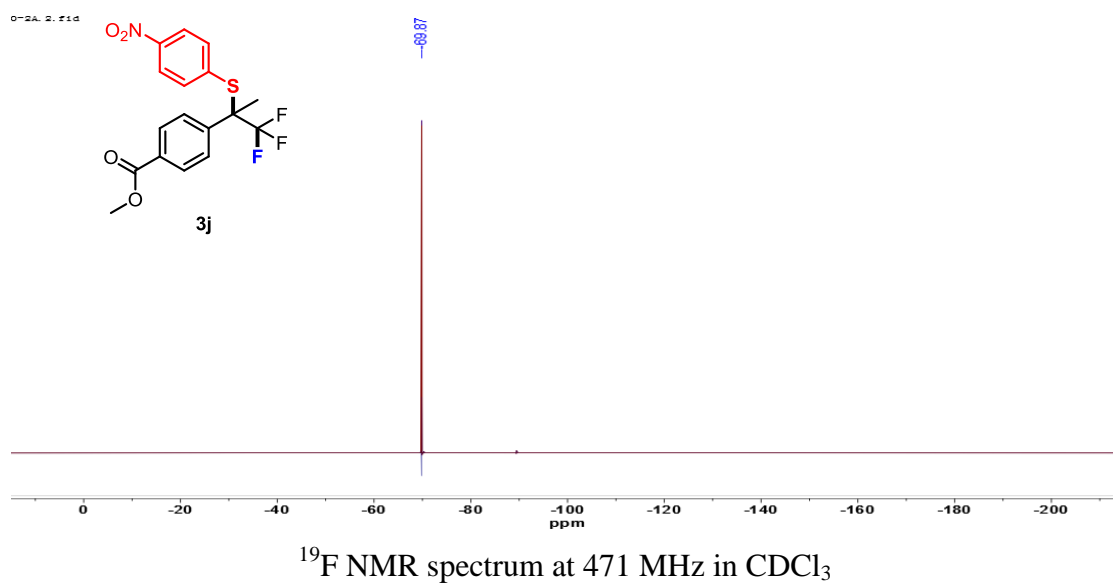

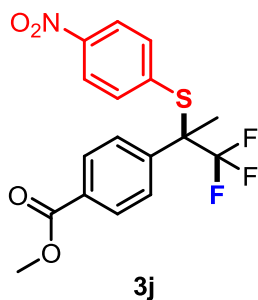

**Chemical Formula: C<sub>17</sub>H<sub>14</sub>F<sub>3</sub>NO<sub>4</sub>S**

**Exact Mass: 385.0596**

**Molecular Weight: 385.3572**

**m/z: 385.0596 (100.0%), 386.0629 (18.4%), 387.0554 (4.5%), 387.0663 (1.6%)**

**Elemental Analysis: C, 52.99; H, 3.66; F, 14.79; N, 3.63; O, 16.61; S, 8.32**

**Acquisition Parameter**

|             |            |                      |          |                  |           |
|-------------|------------|----------------------|----------|------------------|-----------|
| Source Type | ESI        | Ion Polarity         | Positive | Set Nebulizer    | 0.4 Bar   |
| Focus       | Not active | Set Capillary        | 2600 V   | Set Dry Heater   | 180 °C    |
| Scan Begin  | 50 m/z     | Set End Plate Offset | -500 V   | Set Dry Gas      | 4.0 l/min |
| Scan End    | 3000 m/z   | Set Charging Voltage | 2000 V   | Set Divert Valve | Source    |
|             |            | Set Corona           | 0 nA     | Set APCI Heater  | 0 °C      |

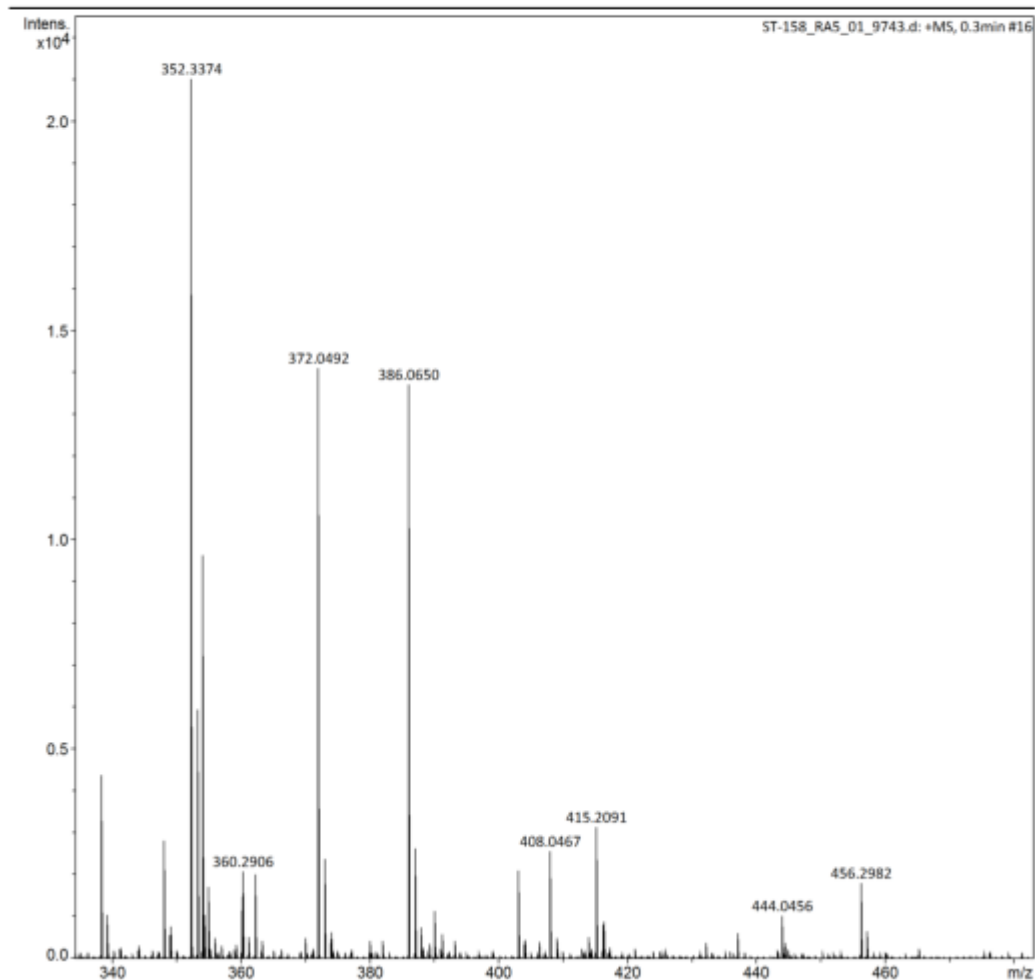

HRMS (ESI, m/z) calcd for C<sub>17</sub>H<sub>14</sub>F<sub>3</sub>NO<sub>4</sub>S [M+H]<sup>+</sup> 386.0668, found 386.0650.

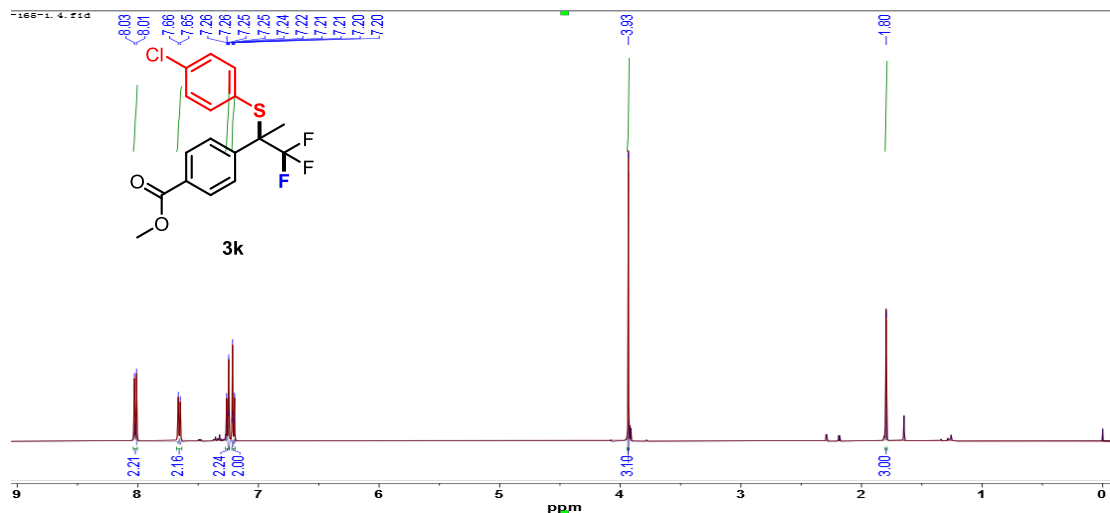

<sup>1</sup>H NMR spectrum at 500 MHz in CDCl<sub>3</sub>

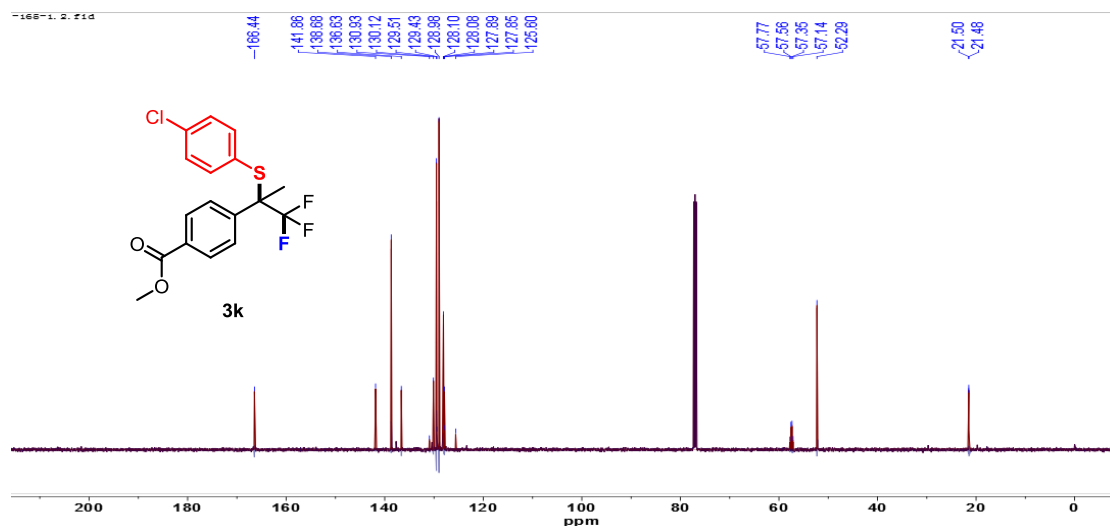

<sup>13</sup>C NMR spectrum at 126 MHz in CDCl<sub>3</sub>

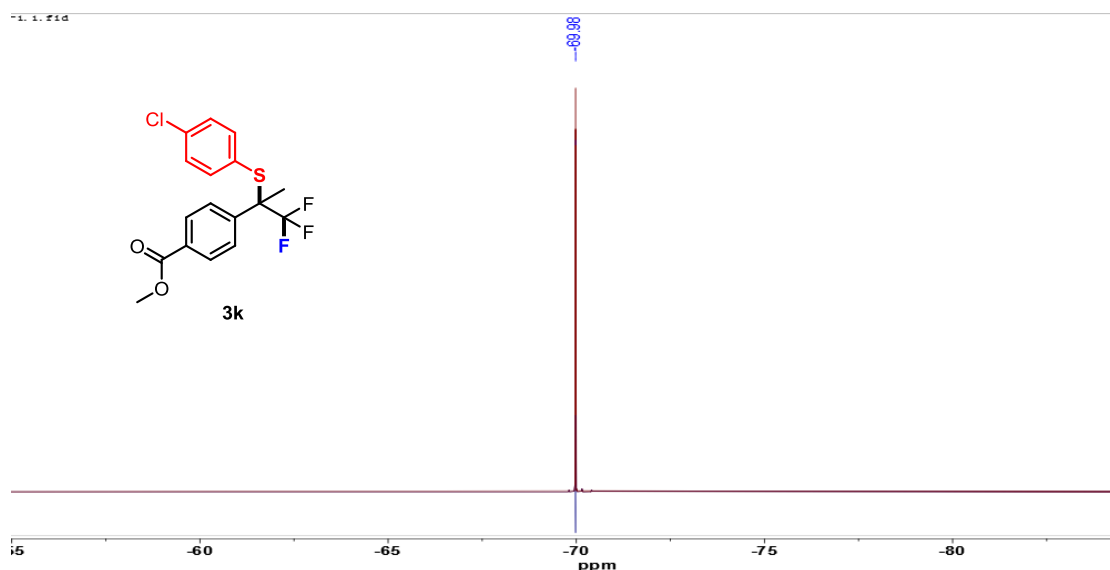

<sup>19</sup>F NMR spectrum at 471 MHz in CDCl<sub>3</sub>



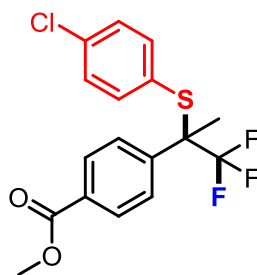

3k

Chemical Formula:  $C_{17}H_{14}ClF_3O_2S$

Exact Mass: 374.0355

Molecular Weight: 374.8022

m/z: 374.0355 (100.0%), 376.0326 (32.0%), 375.0389 (18.4%), 377.0359 (5.9%), 376.0313 (4.5%), 376.0422 (1.6%), 378.0284 (1.4%)

Elemental Analysis: C, 54.48; H, 3.77; Cl, 9.46; F, 15.21; O, 8.54; S, 8.55

Acquisition Parameter

|             |            |                      |          |                  |           |
|-------------|------------|----------------------|----------|------------------|-----------|
| Source Type | ESI        | Ion Polarity         | Positive | Set Nebulizer    | 0.4 Bar   |
| Focus       | Not active | Set Capillary        | 2600 V   | Set Dry Heater   | 180 °C    |
| Scan Begin  | 50 m/z     | Set End Plate Offset | -500 V   | Set Dry Gas      | 4.0 l/min |
| Scan End    | 3000 m/z   | Set Charging Voltage | 2000 V   | Set Divert Valve | Source    |
|             |            | Set Corona           | 0 nA     | Set APCI Heater  | 0 °C      |

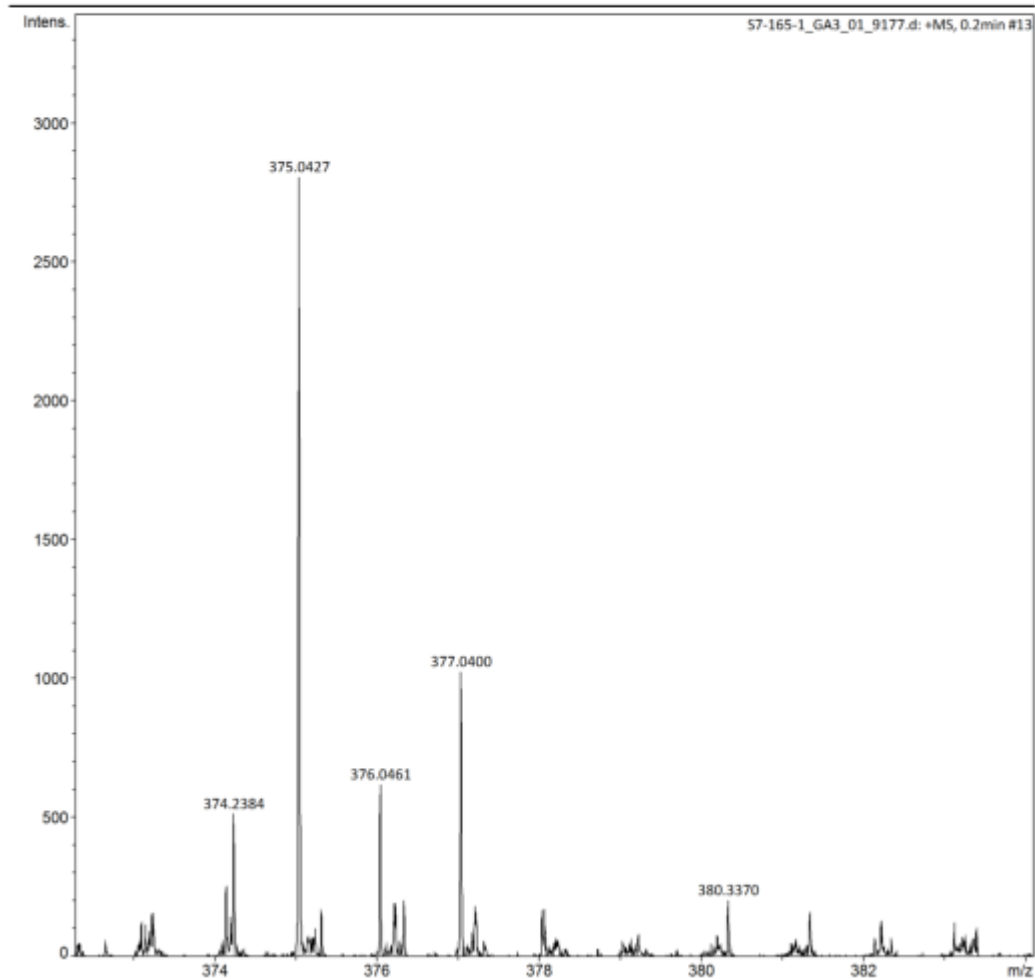

HRMS (ESI, m/z) calcd for  $C_{17}H_{14}ClF_3O_2S [M+H]^+$  375.0428, found 375.0427.

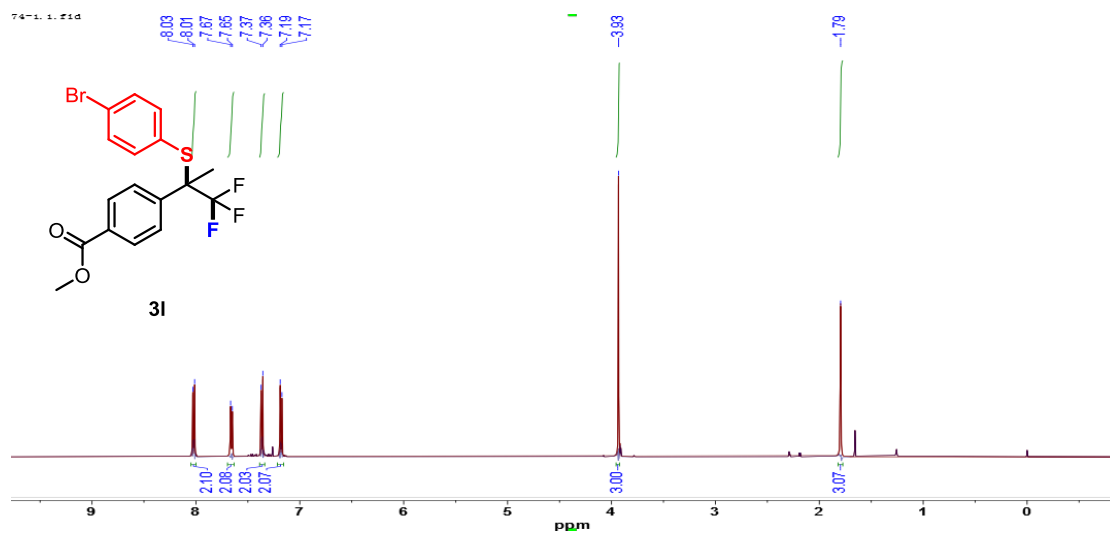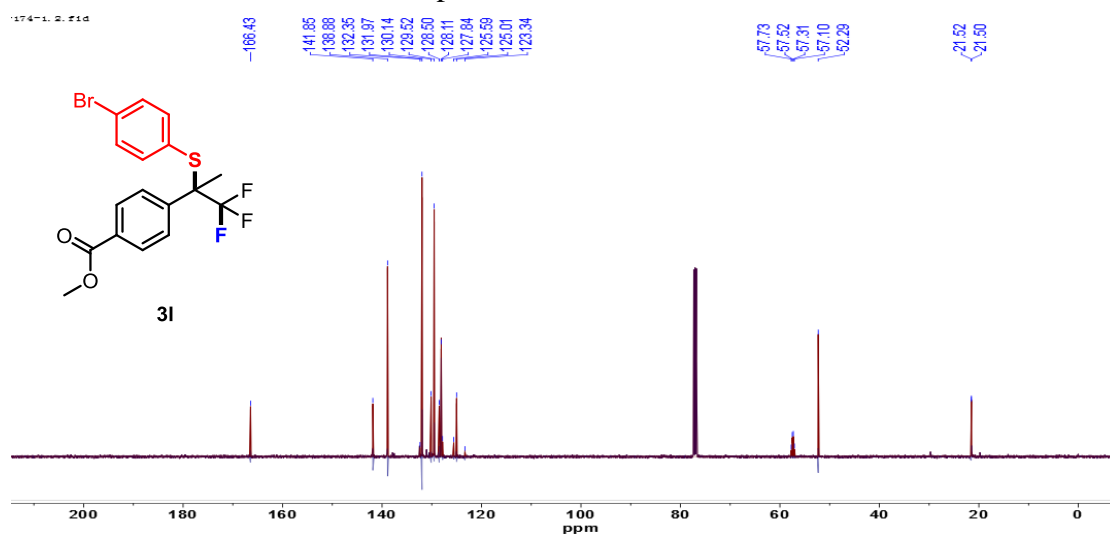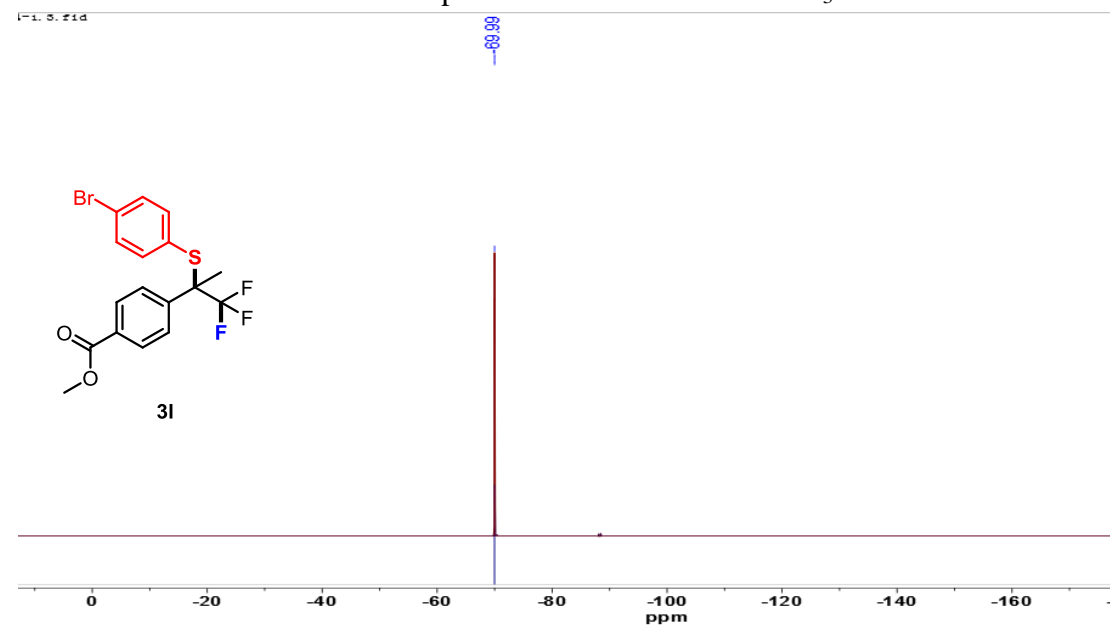

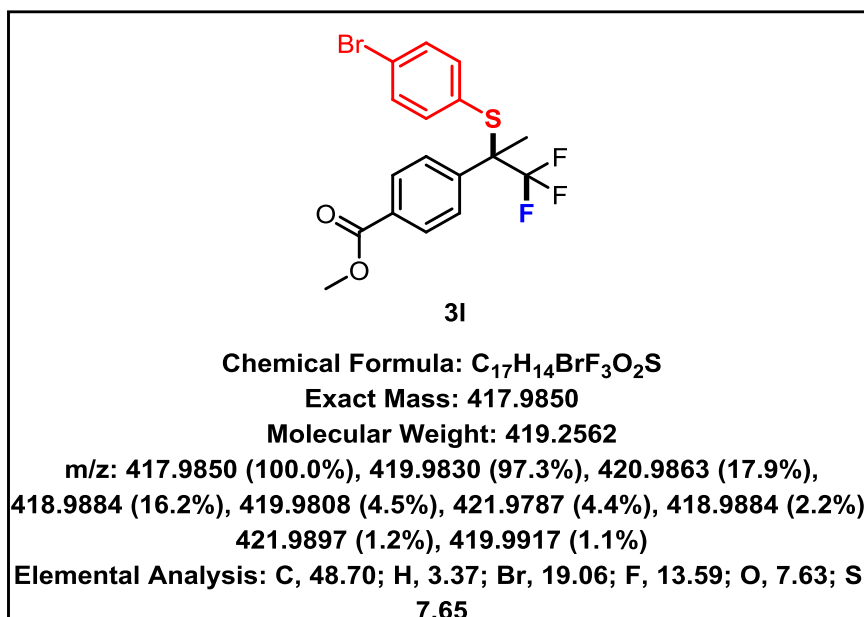

Sample Name ST-174-1 Instrument impact II 1825265.10256  
 Comment

**Acquisition Parameter**

|             |            |                      |          |                  |           |
|-------------|------------|----------------------|----------|------------------|-----------|
| Source Type | ESI        | Ion Polarity         | Positive | Set Nebulizer    | 0.4 Bar   |
| Focus       | Not active | Set Capillary        | 2600 V   | Set Dry Heater   | 180 °C    |
| Scan Begin  | 50 m/z     | Set End Plate Offset | -500 V   | Set Dry Gas      | 4.0 l/min |
| Scan End    | 3000 m/z   | Set Charging Voltage | 2000 V   | Set Divert Valve | Source    |
|             |            | Set Corona           | 0 nA     | Set APCI Heater  | 0 °C      |

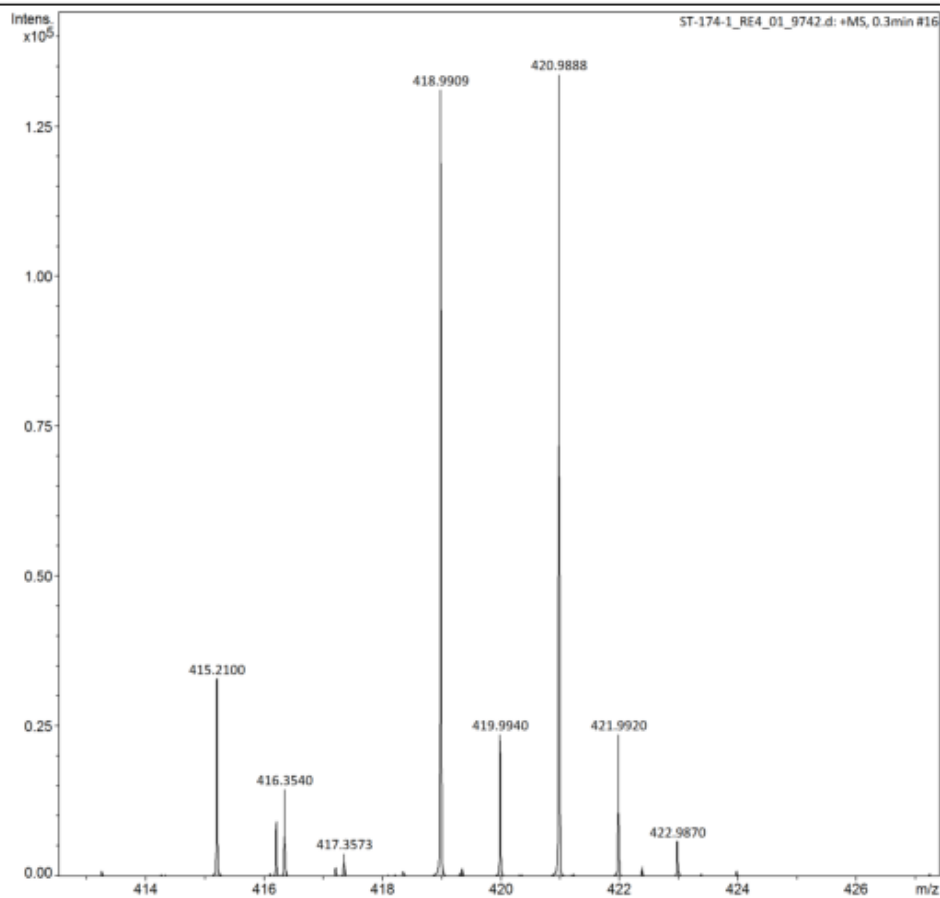

HRMS (ESI, m/z) calcd for C<sub>17</sub>H<sub>14</sub>BrF<sub>3</sub>O<sub>2</sub>S [M+H]<sup>+</sup> 418.9923, found 418.9909.

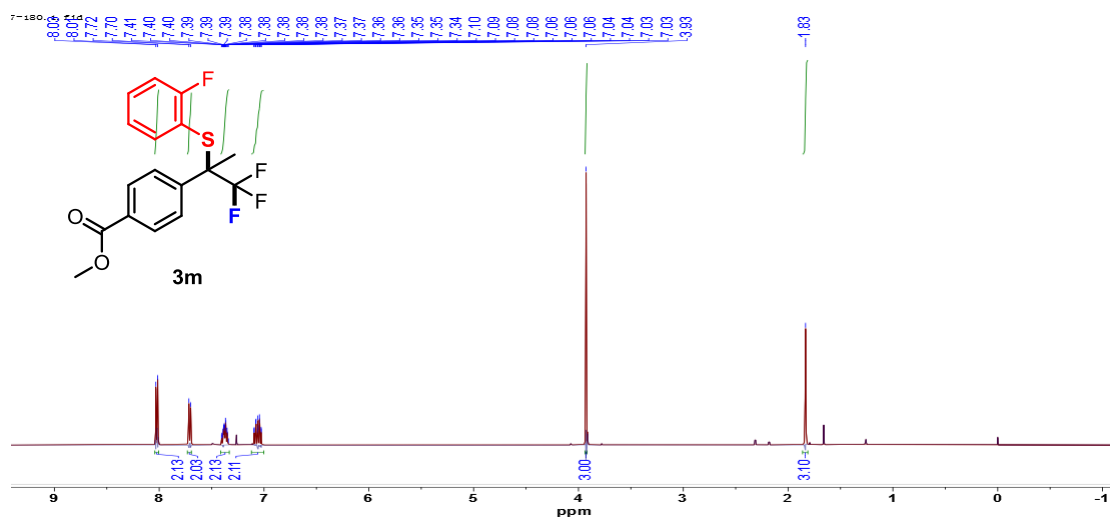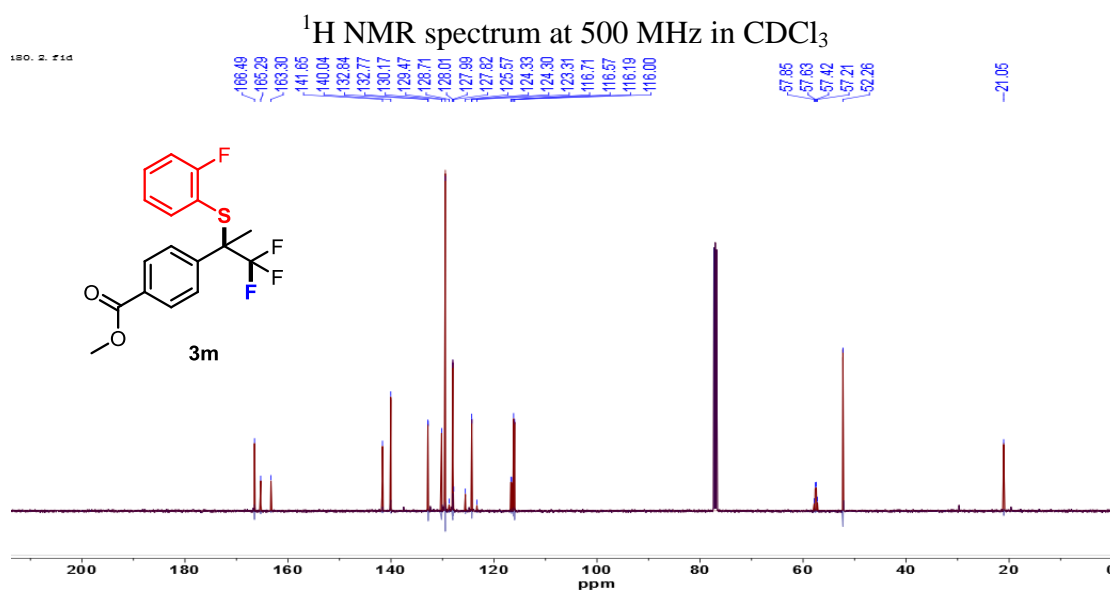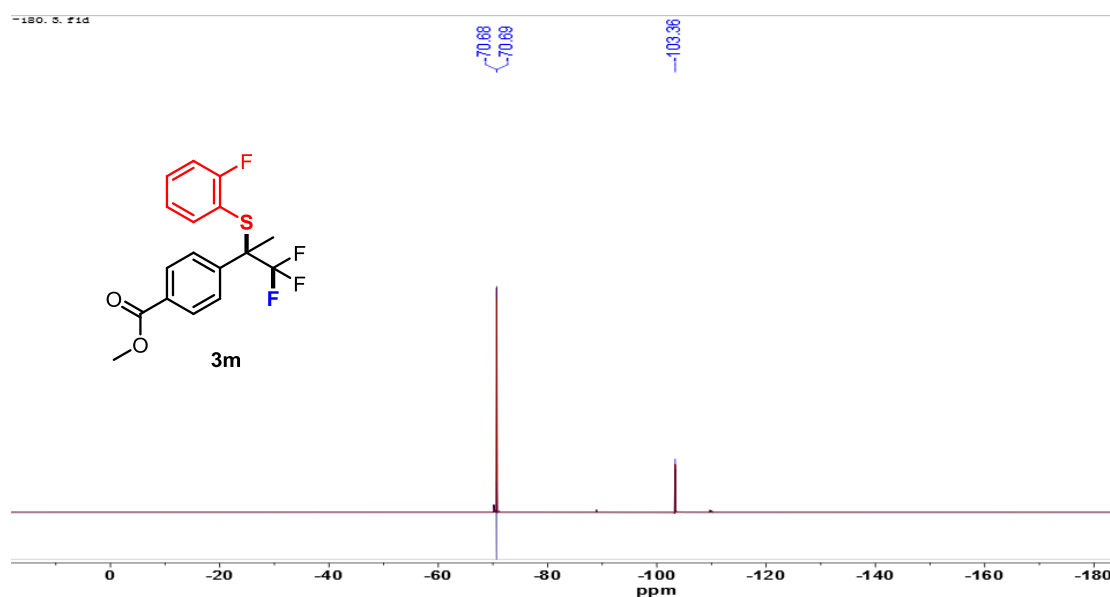

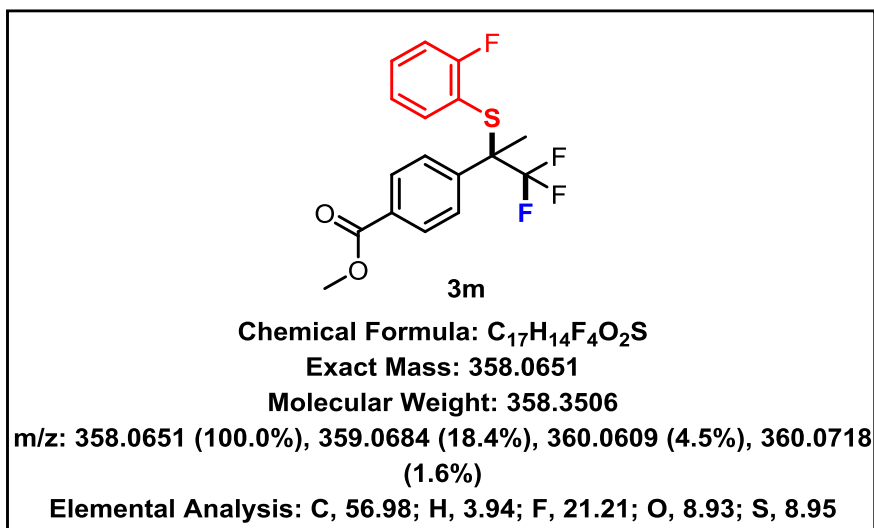

**Acquisition Parameter**

|             |            |                      |          |                  |           |
|-------------|------------|----------------------|----------|------------------|-----------|
| Source Type | ESI        | Ion Polarity         | Positive | Set Nebulizer    | 0.4 Bar   |
| Focus       | Not active | Set Capillary        | 2600 V   | Set Dry Heater   | 180 °C    |
| Scan Begin  | 50 m/z     | Set End Plate Offset | -500 V   | Set Dry Gas      | 4.0 l/min |
| Scan End    | 3000 m/z   | Set Charging Voltage | 2000 V   | Set Divert Valve | Source    |
|             |            | Set Corona           | 0 nA     | Set APCI Heater  | 0 °C      |

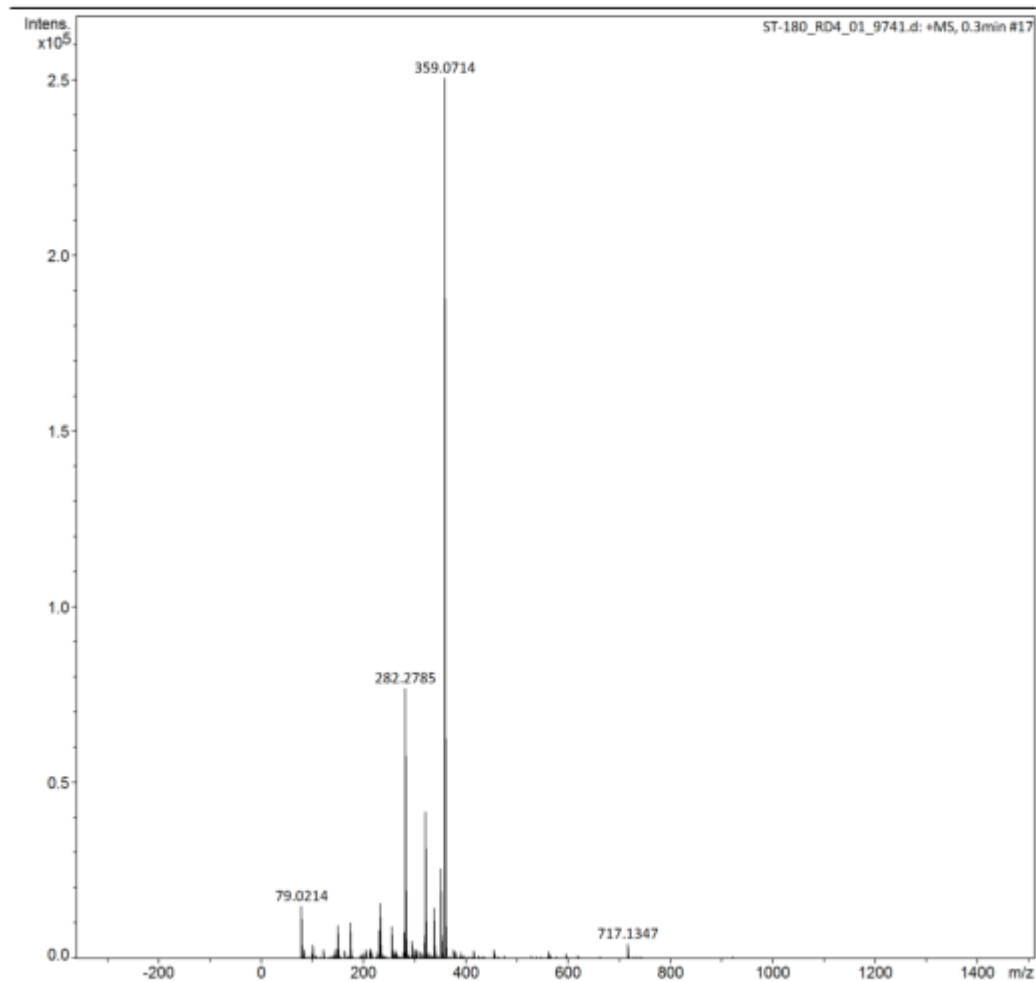

ST-180\_RD4\_01\_9741.d

HRMS (ESI, m/z) calcd for C<sub>17</sub>H<sub>14</sub>F<sub>4</sub>O<sub>2</sub>S [M+H]<sup>+</sup> 359.0723, found 359.0714.

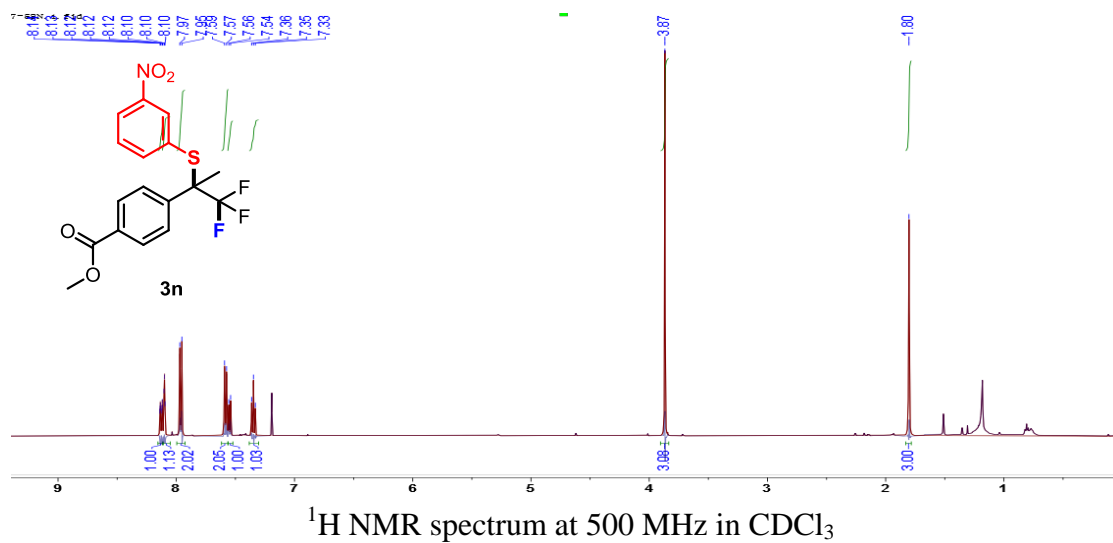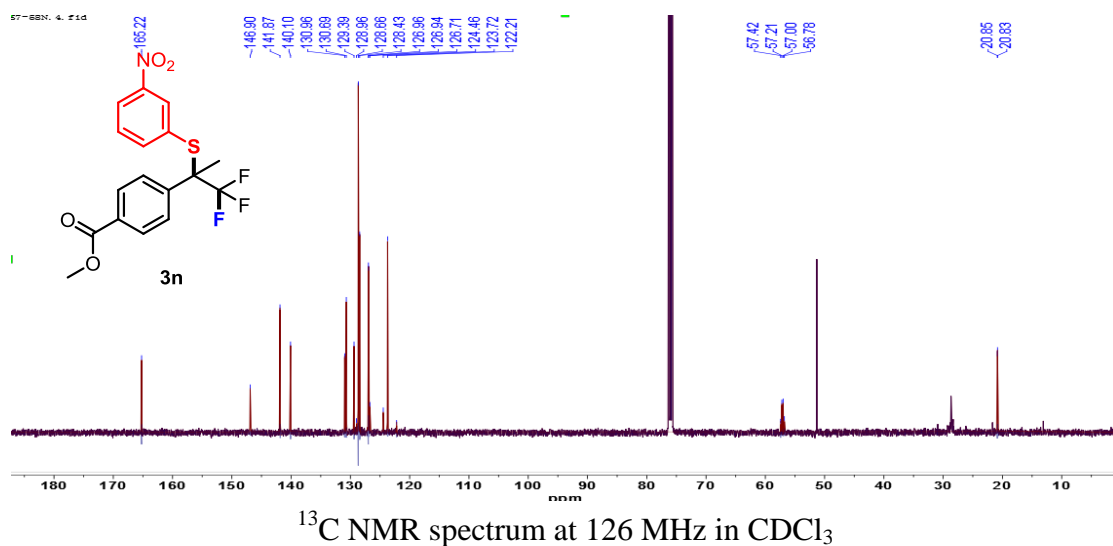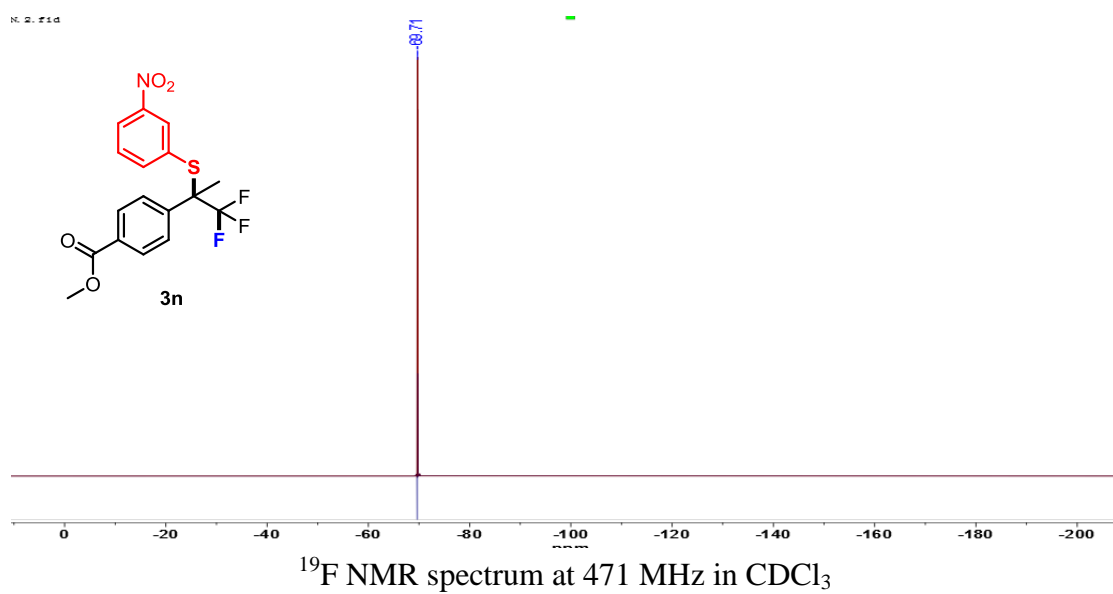

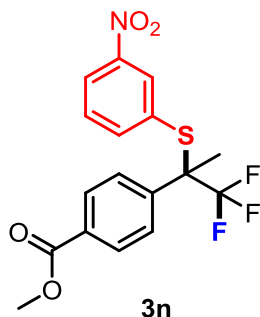

**Chemical Formula: C<sub>17</sub>H<sub>14</sub>F<sub>3</sub>NO<sub>4</sub>S**

**Exact Mass: 385.0596**

**Molecular Weight: 385.3572**

**m/z: 385.0596 (100.0%), 386.0629 (18.4%), 387.0554 (4.5%), 387.0663 (1.6%)**

**Elemental Analysis: C, 52.99; H, 3.66; F, 14.79; N, 3.63; O, 16.61; S, 8.32**

**Acquisition Parameter**

|             |            |                      |          |                  |           |
|-------------|------------|----------------------|----------|------------------|-----------|
| Source Type | ESI        | Ion Polarity         | Positive | Set Nebulizer    | 0.4 Bar   |
| Focus       | Not active | Set Capillary        | 2600 V   | Set Dry Heater   | 180 °C    |
| Scan Begin  | 50 m/z     | Set End Plate Offset | -500 V   | Set Dry Gas      | 4.0 l/min |
| Scan End    | 3000 m/z   | Set Charging Voltage | 2000 V   | Set Divert Valve | Source    |
|             |            | Set Corona           | 0 nA     | Set APCI Heater  | 0 °C      |

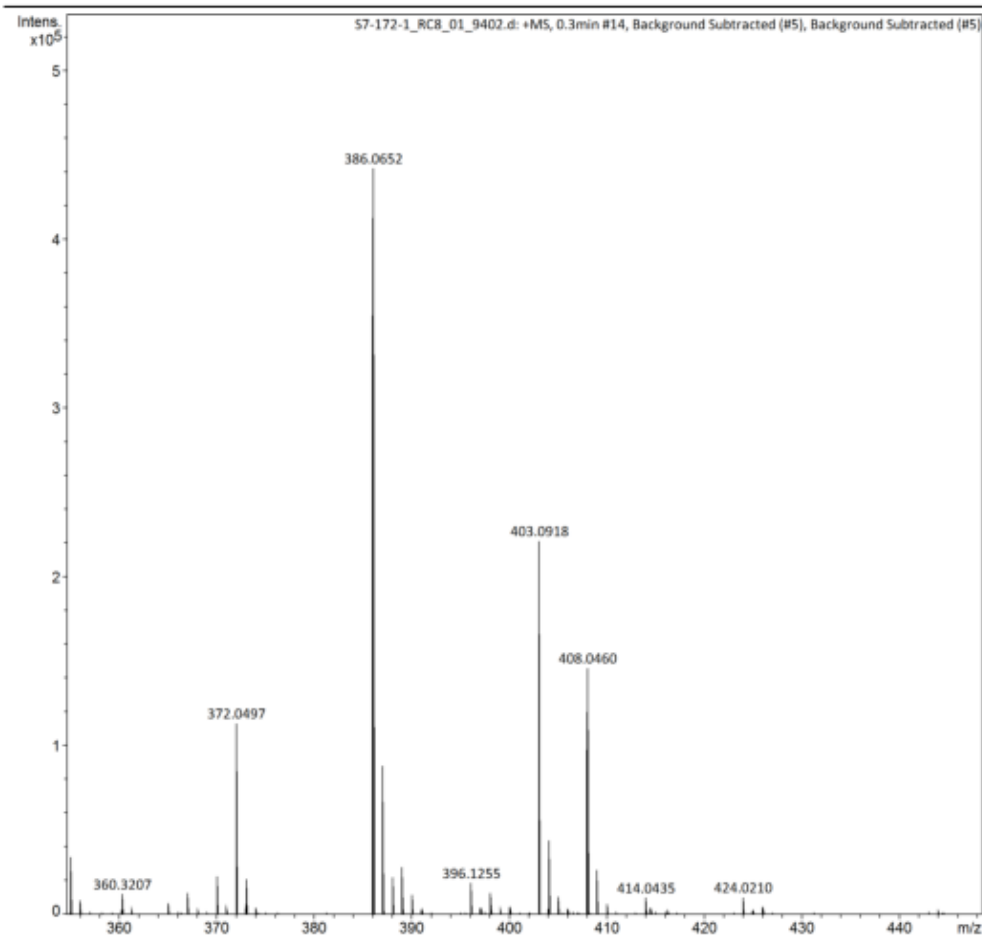

S7-172-1\_RC8\_01\_9402.d

Bruker Compass DataAnalysis 4.4

printed: 8/27/2021 10:18:07 AM

bv: demo

Page 1 of 1

HRMS (ESI, m/z) calcd for C<sub>17</sub>H<sub>14</sub>F<sub>3</sub>NO<sub>4</sub>S [M+H]<sup>+</sup> 386.0668, found 386.0652.

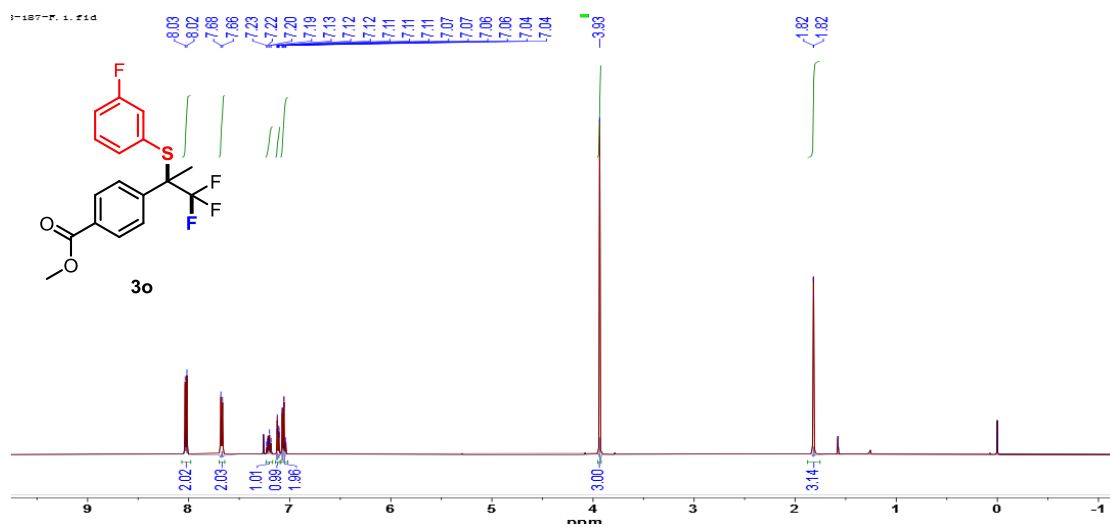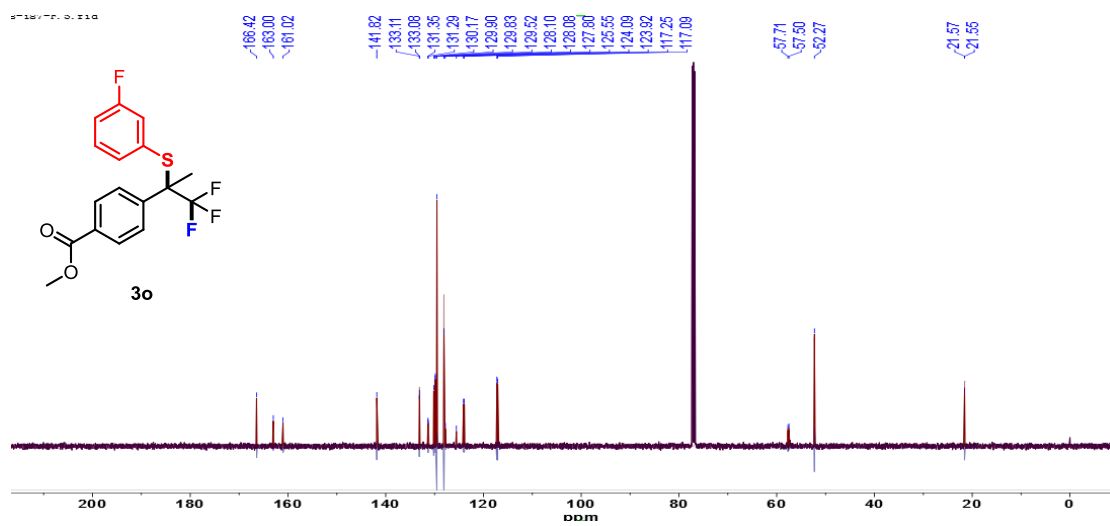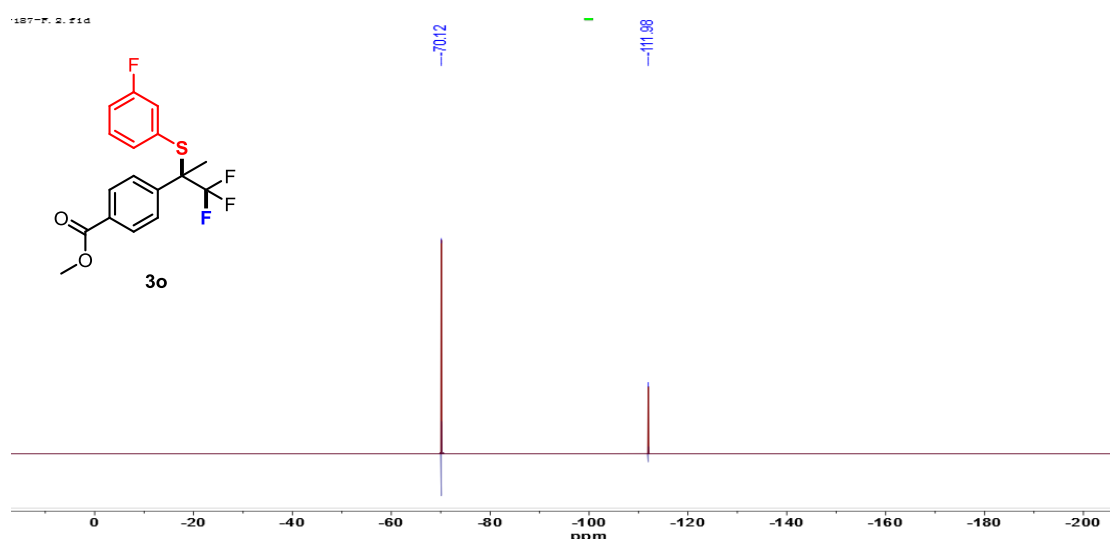



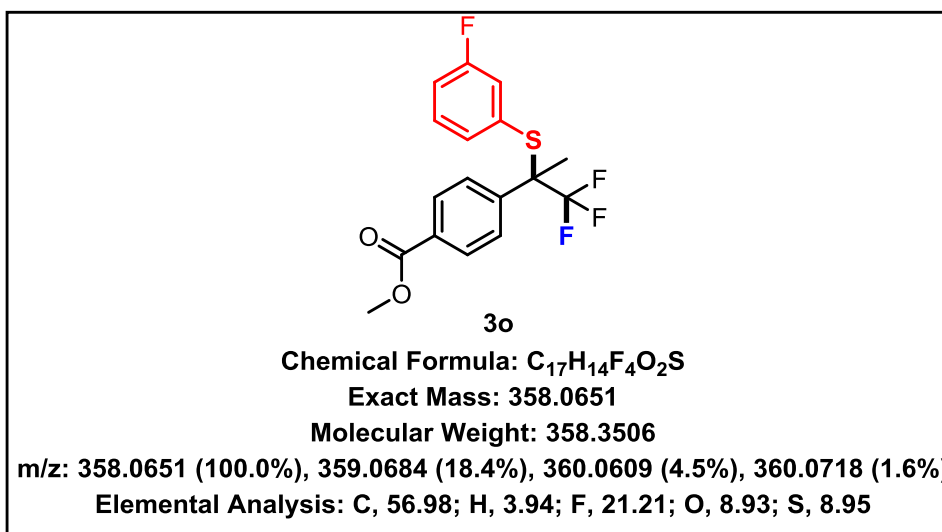

| Acquisition Parameter |            |                      |          |                  |           |
|-----------------------|------------|----------------------|----------|------------------|-----------|
| Source Type           | ESI        | Ion Polarity         | Positive | Set Nebulizer    | 0.4 Bar   |
| Focus                 | Not active | Set Capillary        | 2600 V   | Set Dry Heater   | 180 °C    |
| Scan Begin            | 50 m/z     | Set End Plate Offset | -500 V   | Set Dry Gas      | 4.0 l/min |
| Scan End              | 3000 m/z   | Set Charging Voltage | 2000 V   | Set Divert Valve | Source    |
|                       |            | Set Corona           | 0 nA     | Set APCI Heater  | 0 °C      |

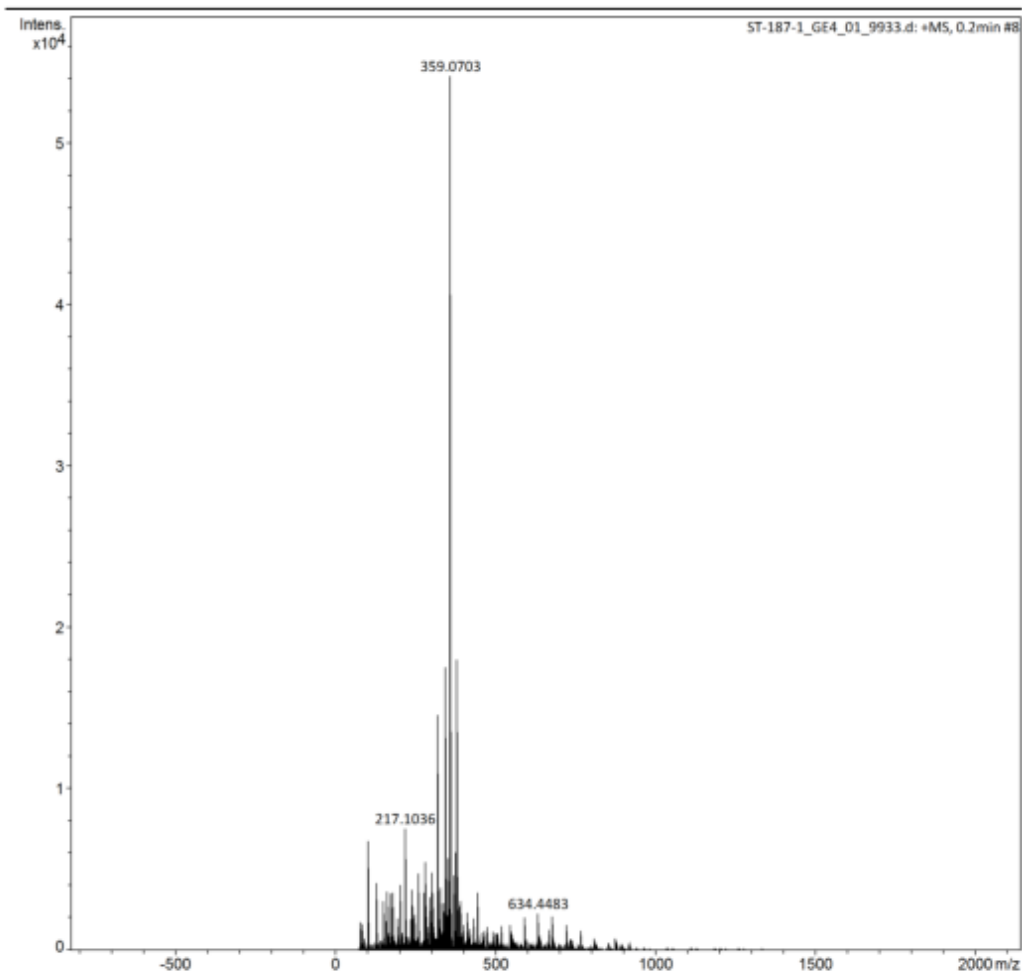

ST-187-1\_GE4\_01\_9933.d

HRMS (ESI, m/z) calcd for C<sub>17</sub>H<sub>14</sub>F<sub>4</sub>O<sub>2</sub>S [M+H]<sup>+</sup> 359.0723, found 359.0703.

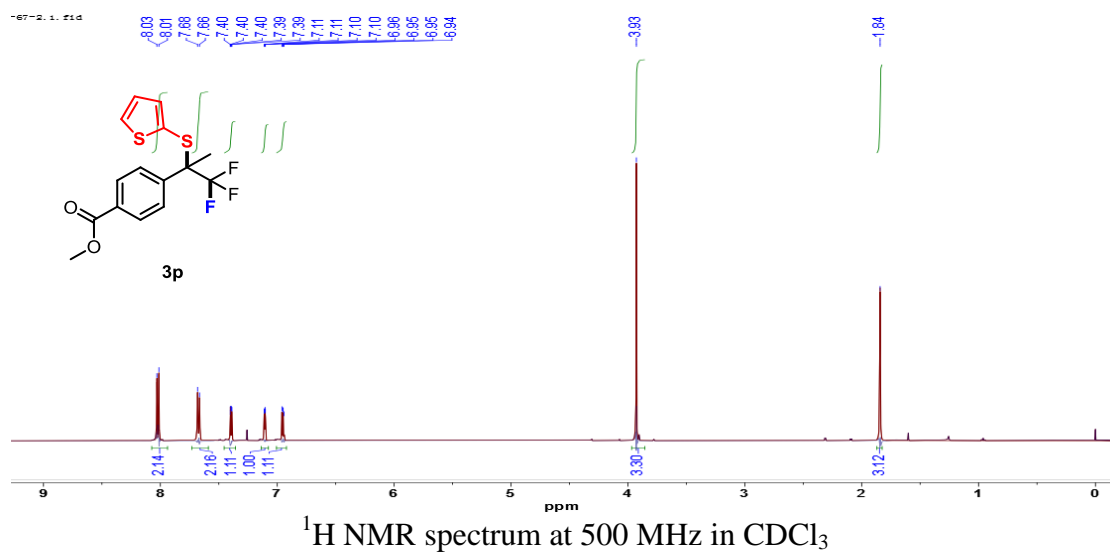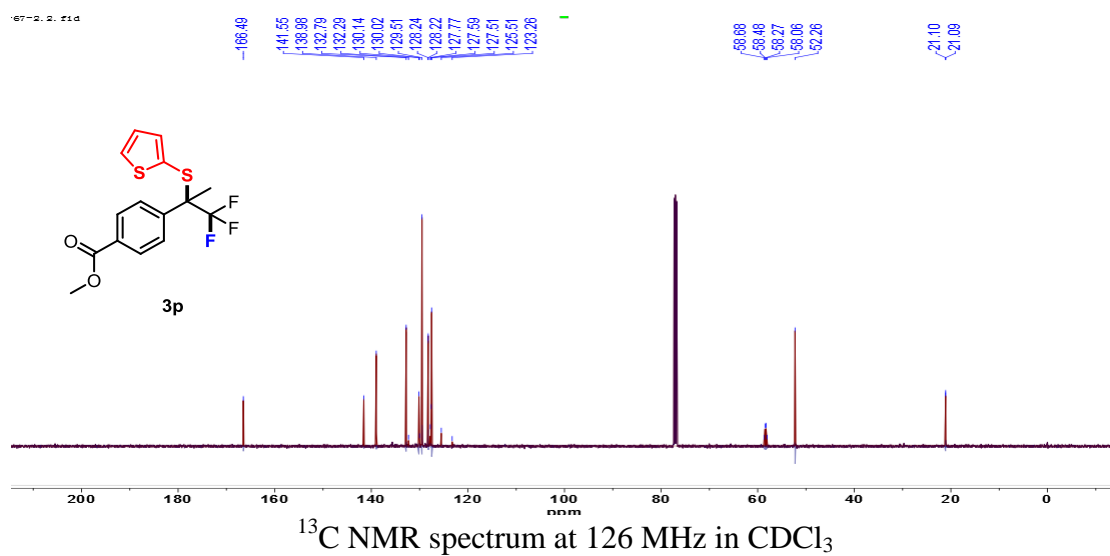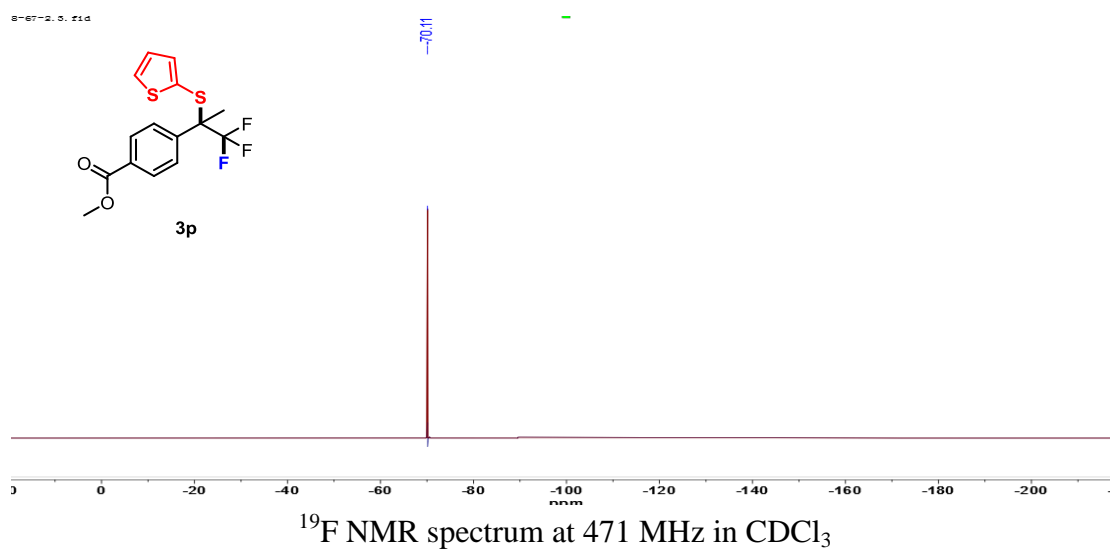

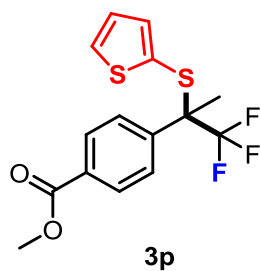

**3p**

Chemical Formula:  $C_{15}H_{13}F_3O_2S_2$

Exact Mass: 346.0309

Molecular Weight: 346.3822

$m/z$ : 346.0309 (100.0%), 347.0343 (16.2%), 348.0267 (9.0%),  
347.0303 (1.6%),

349.0301 (1.5%), 348.0376 (1.2%)

Elemental Analysis: C, 52.01; H, 3.78; F, 16.45; O, 9.24; S, 18.51

**Acquisition Parameter**

|             |            |                      |          |                  |           |
|-------------|------------|----------------------|----------|------------------|-----------|
| Source Type | ESI        | Ion Polarity         | Positive | Set Nebulizer    | 0.4 Bar   |
| Focus       | Not active | Set Capillary        | 2600 V   | Set Dry Heater   | 180 °C    |
| Scan Begin  | 50 $m/z$   | Set End Plate Offset | -500 V   | Set Dry Gas      | 4.0 l/min |
| Scan End    | 3000 $m/z$ | Set Charging Voltage | 2000 V   | Set Divert Valve | Source    |
|             |            | Set Corona           | 0 nA     | Set APCI Heater  | 0 °C      |

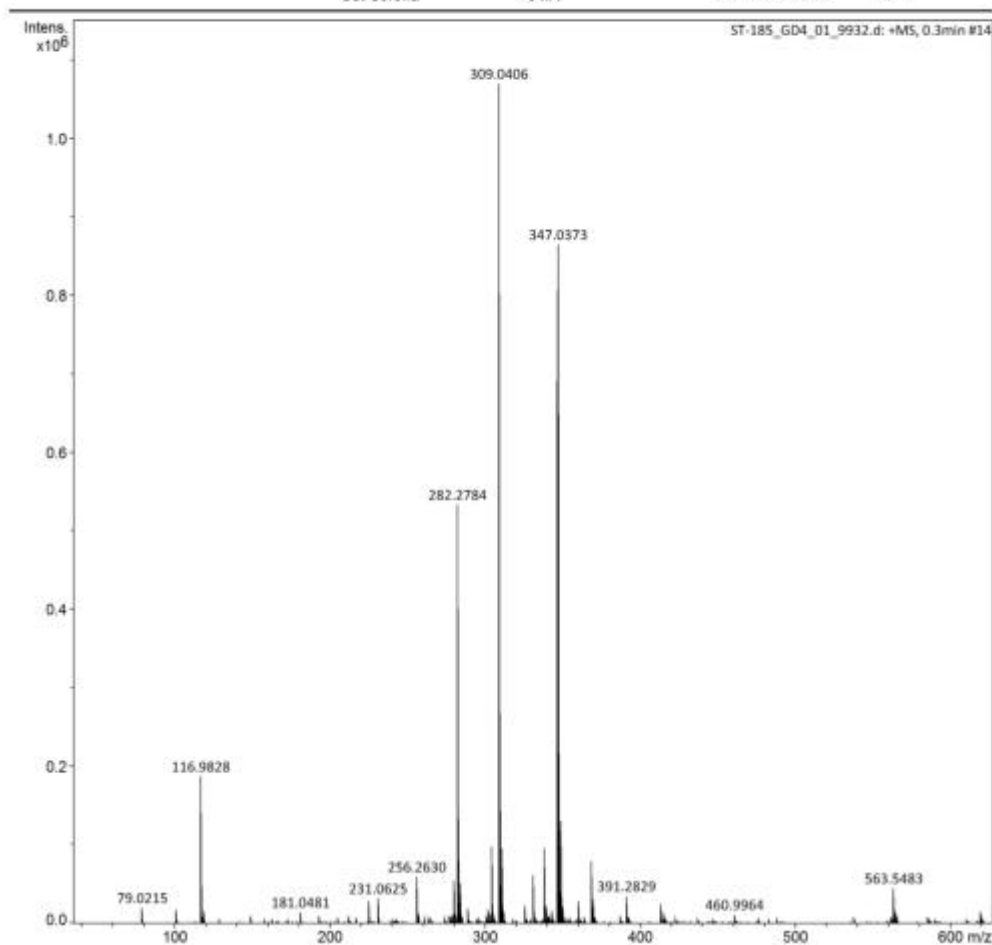

HRMS (ESI,  $m/z$ ) calcd for  $C_{15}H_{13}F_3O_2S_2$   $[M+H]^+$  347.0382, found 347.0373.

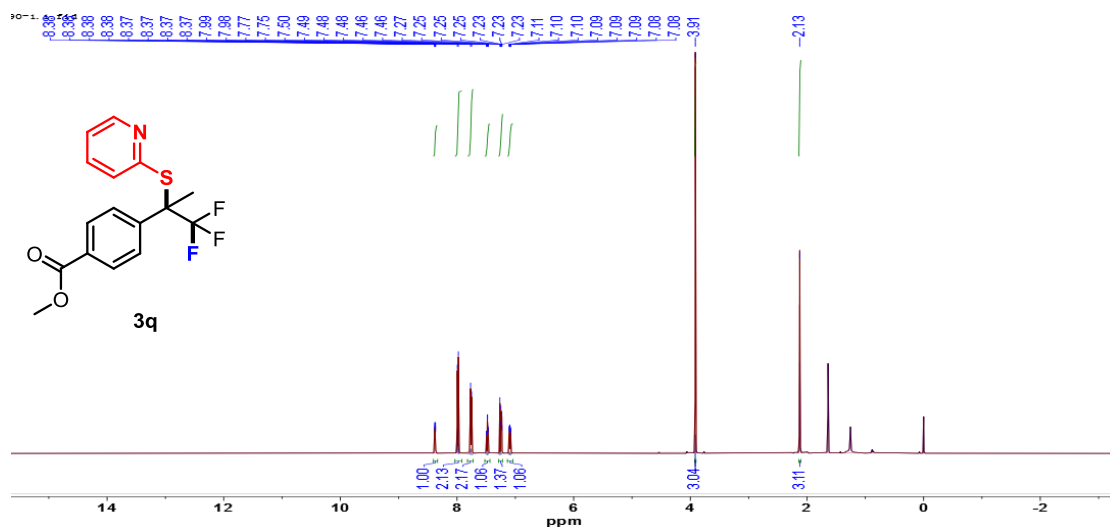

**<sup>1</sup>H NMR spectrum at 500 MHz in CDCl<sub>3</sub>**

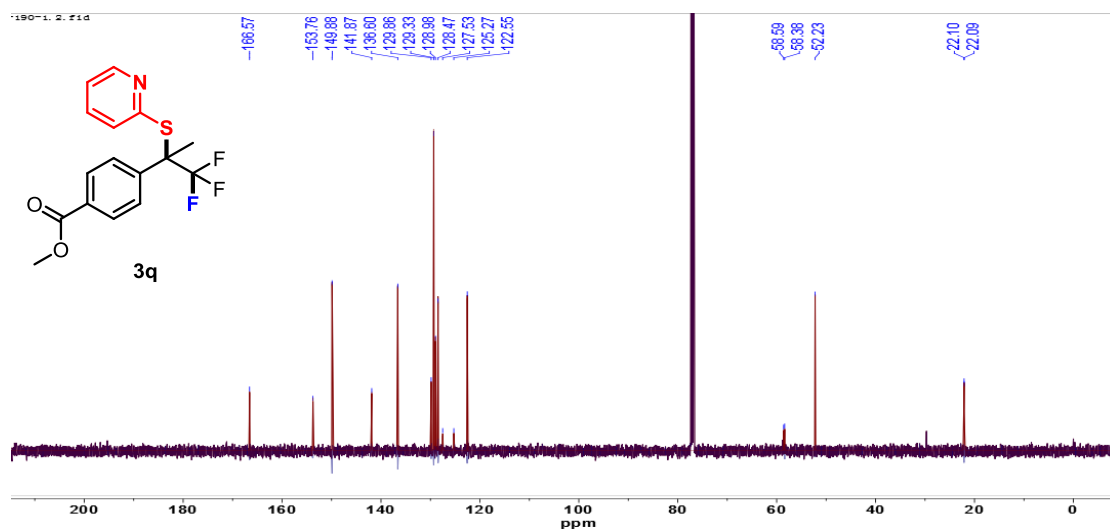

**<sup>13</sup>C NMR spectrum at 126 MHz in CDCl<sub>3</sub>**

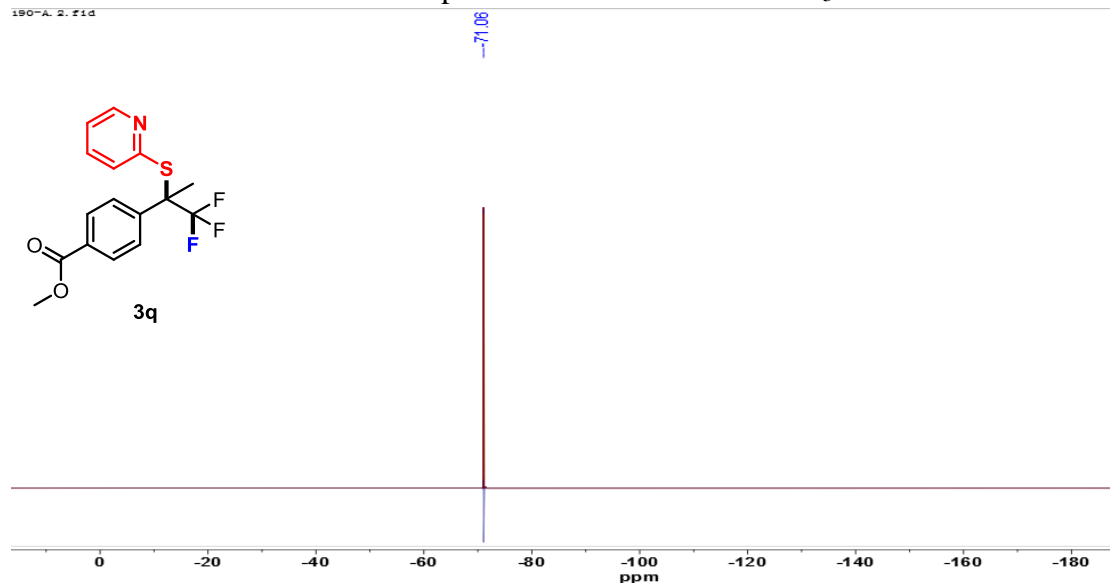

**<sup>19</sup>F NMR spectrum at 471 MHz in CDCl<sub>3</sub>**

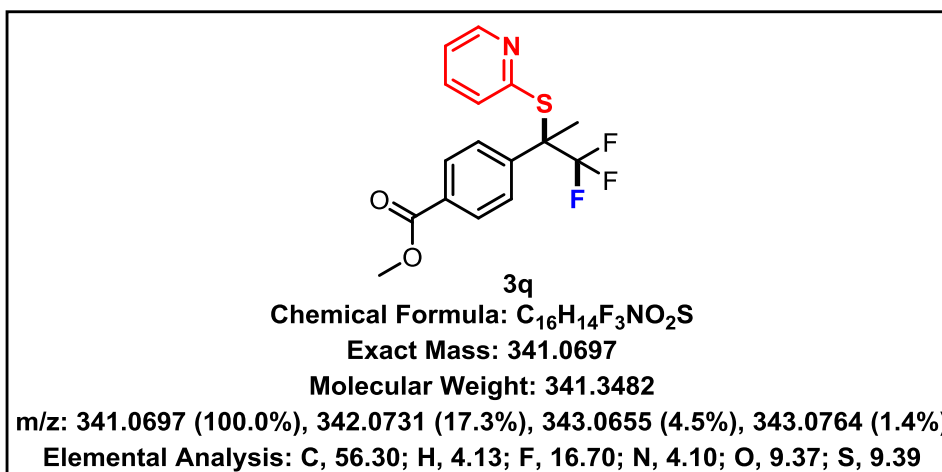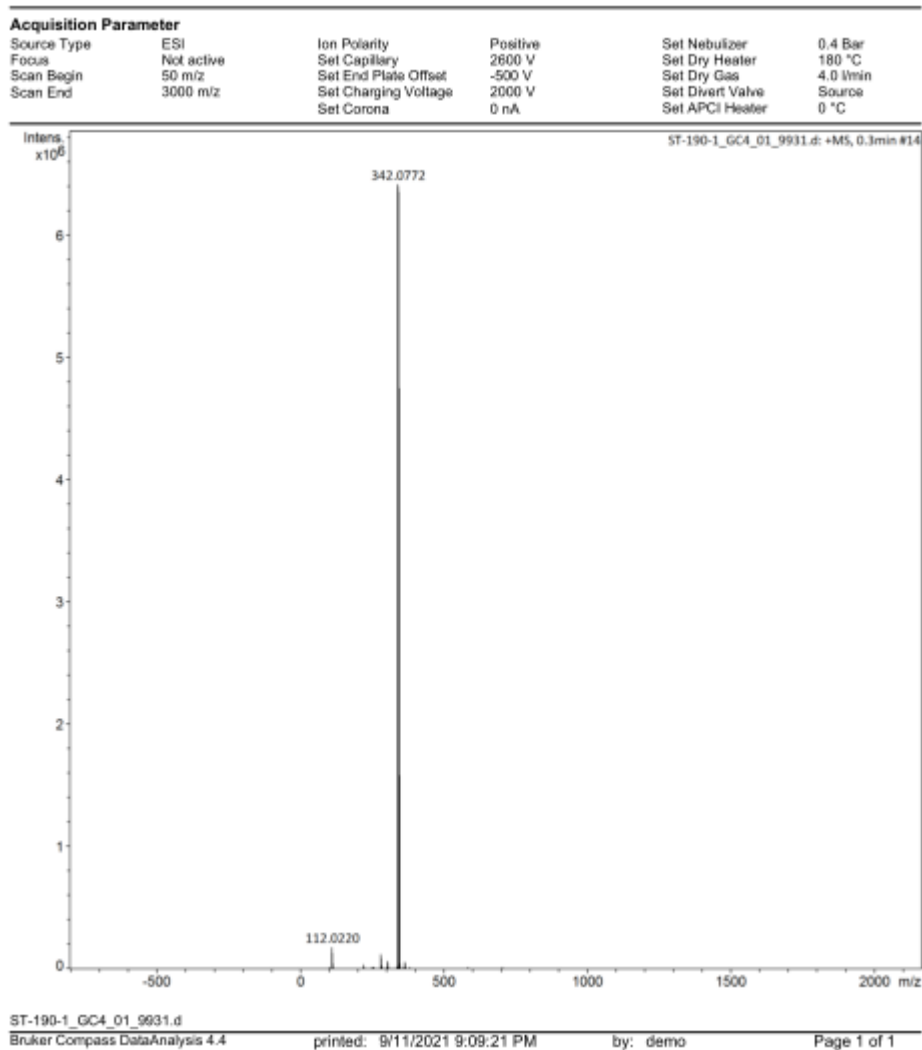

HRMS (ESI, m/z) calcd for C<sub>16</sub>H<sub>14</sub>F<sub>3</sub>NO<sub>2</sub>S [M+H]<sup>+</sup> 342.0770, found 342.0772.

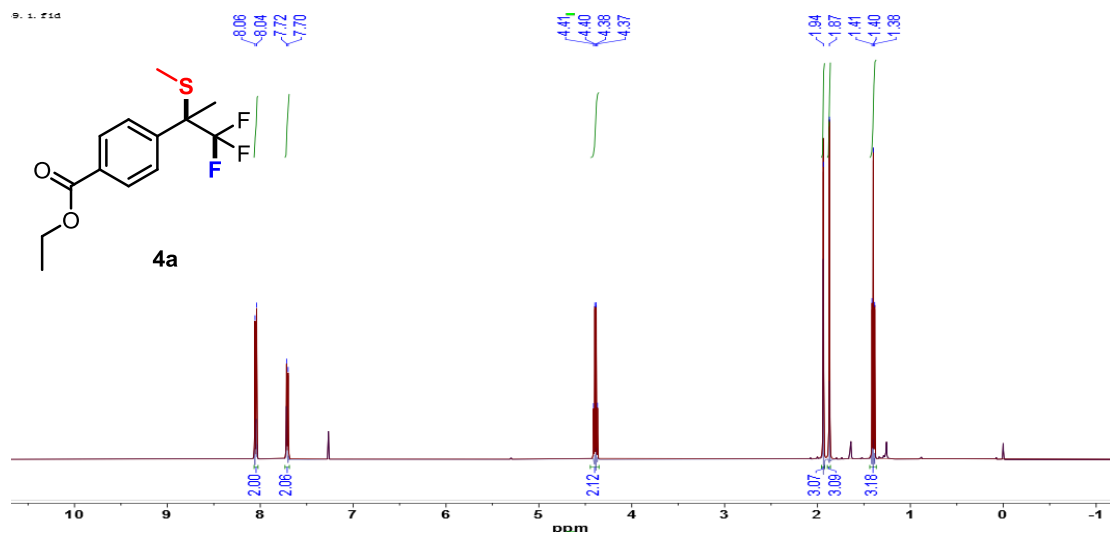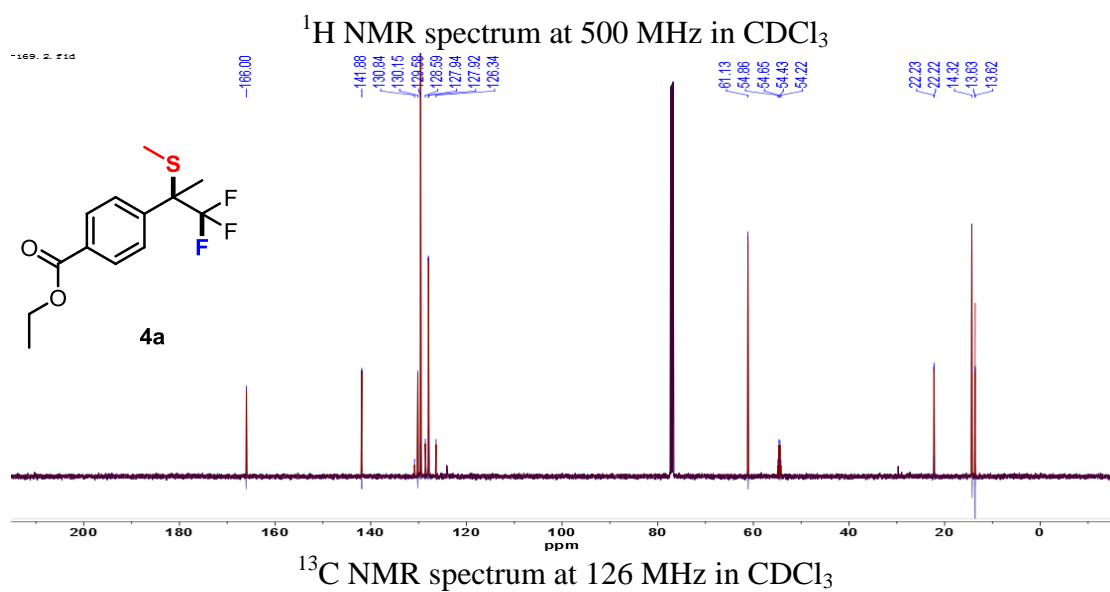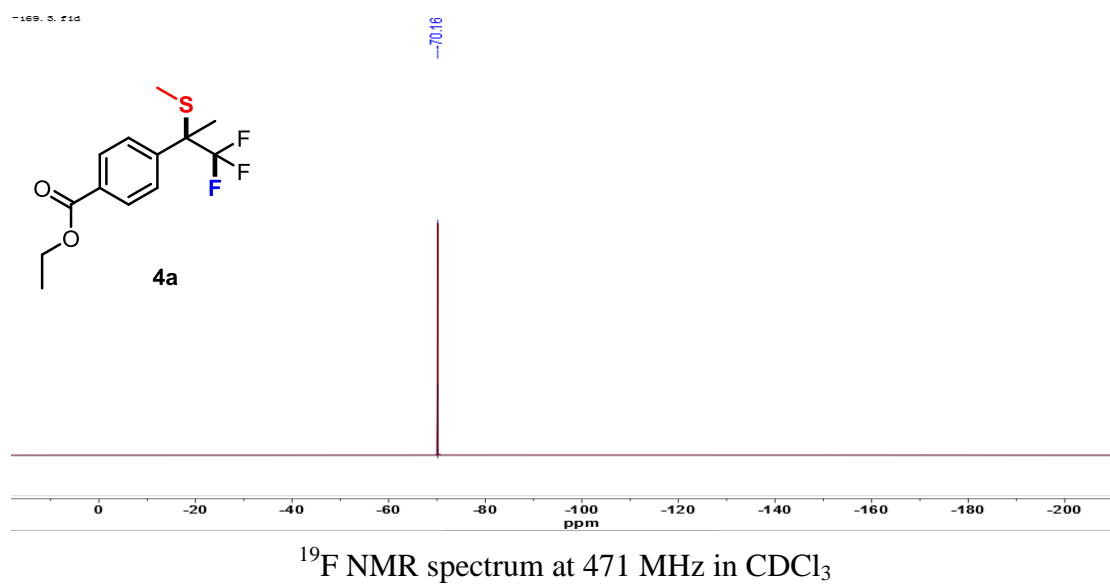

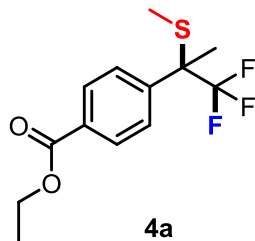

**Chemical Formula: C<sub>13</sub>H<sub>15</sub>F<sub>3</sub>O<sub>2</sub>S**

**Exact Mass: 292.0745**

**Molecular Weight: 292.3162**

**m/z: 292.0745 (100.0%), 293.0778 (14.1%), 294.0703 (4.5%)**

**Elemental Analysis: C, 53.42; H, 5.17; F, 19.50; O, 10.95; S, 10.97**

**Acquisition Parameter**

|             |            |                      |          |                  |           |
|-------------|------------|----------------------|----------|------------------|-----------|
| Source Type | ESI        | Ion Polarity         | Positive | Set Nebulizer    | 0.4 Bar   |
| Focus       | Not active | Set Capillary        | 2800 V   | Set Dry Heater   | 180 °C    |
| Scan Begin  | 50 m/z     | Set End Plate Offset | -500 V   | Set Dry Gas      | 4.0 l/min |
| Scan End    | 3000 m/z   | Set Charging Voltage | 2000 V   | Set Divert Valve | Source    |
|             |            | Set Corona           | 0 nA     | Set APCI Heater  | 0 °C      |

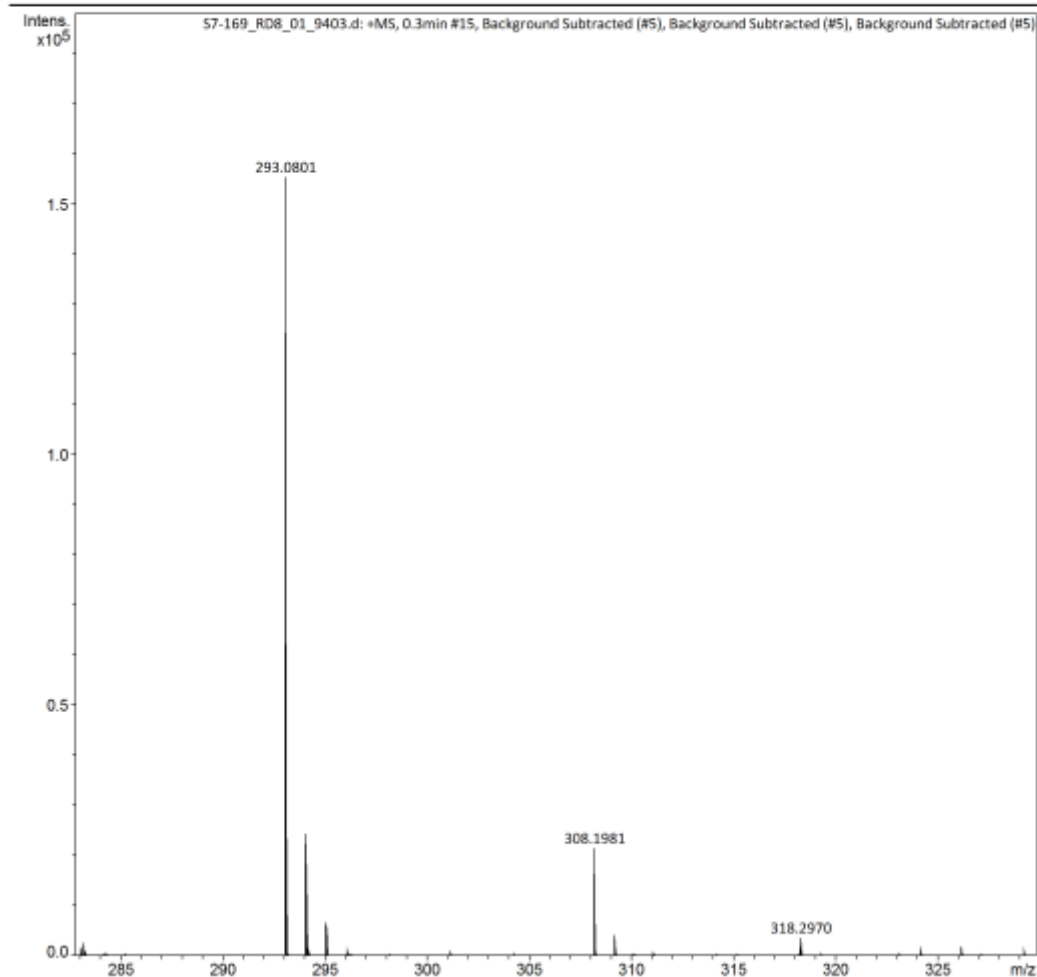

HRMS (ESI, m/z) calcd for C<sub>13</sub>H<sub>15</sub>F<sub>3</sub>O<sub>2</sub>S [M+H]<sup>+</sup> 293.0818, found 293.0801.

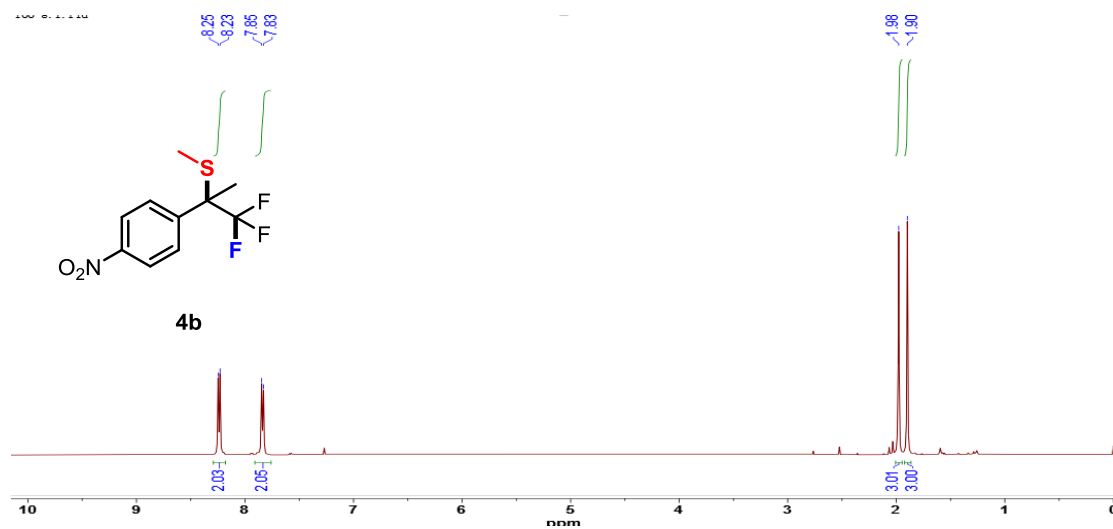

<sup>1</sup>H NMR spectrum at 500 MHz in CDCl<sub>3</sub>

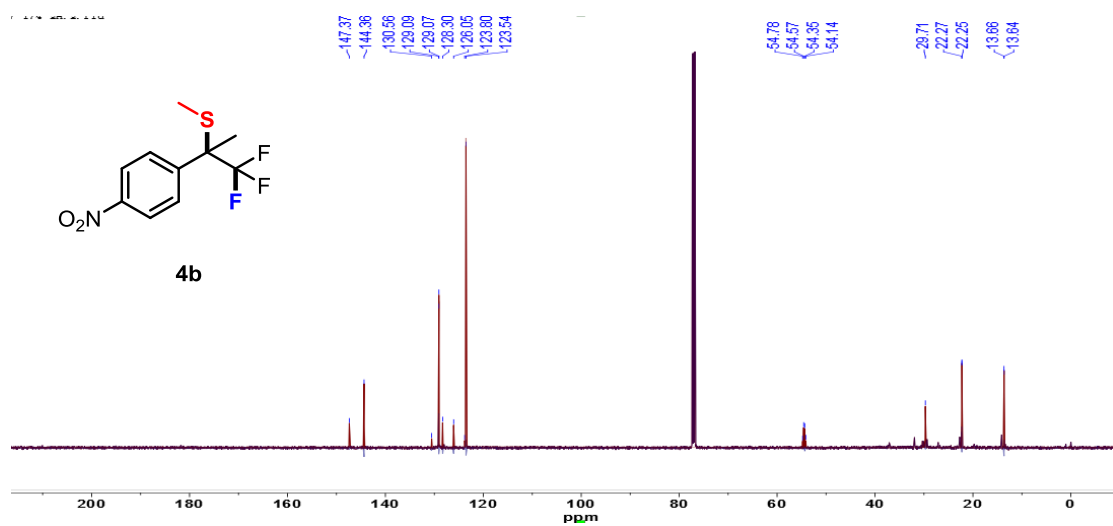

<sup>13</sup>C NMR spectrum at 126 MHz in CDCl<sub>3</sub>

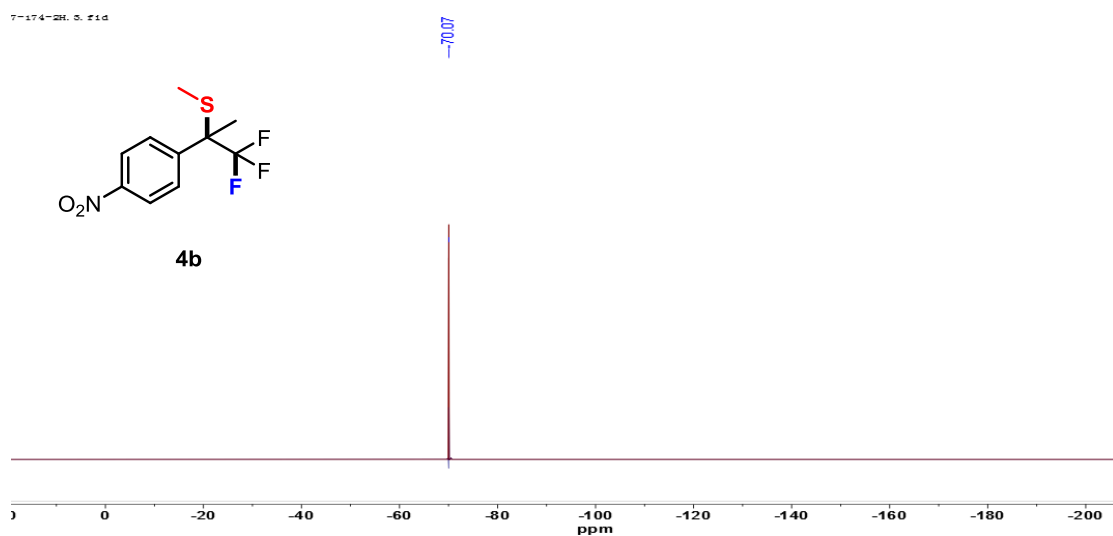

<sup>19</sup>F NMR spectrum at 471 MHz in CDCl<sub>3</sub>



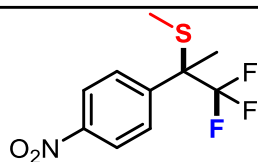

**4b**

Chemical Formula: C<sub>10</sub>H<sub>10</sub>F<sub>3</sub>NO<sub>2</sub>S

Exact Mass: 265.0384

Molecular Weight: 265.2502

m/z: 265.0384 (100.0%), 266.0418 (10.8%), 267.0342 (4.5%)

Elemental Analysis: C, 45.28; H, 3.80; F, 21.49; N, 5.28; O, 12.06; S, 12.09

**Acquisition Parameter**

|             |            |                      |          |                  |           |
|-------------|------------|----------------------|----------|------------------|-----------|
| Source Type | ESI        | Ion Polarity         | Positive | Set Nebulizer    | 0.4 Bar   |
| Focus       | Not active | Set Capillary        | 2600 V   | Set Dry Heater   | 180 °C    |
| Scan Begin  | 50 m/z     | Set End Plate Offset | -500 V   | Set Dry Gas      | 4.0 l/min |
| Scan End    | 3000 m/z   | Set Charging Voltage | 2000 V   | Set Divert Valve | Source    |
|             |            | Set Corona           | 0 nA     | Set APCI Heater  | 0 °C      |

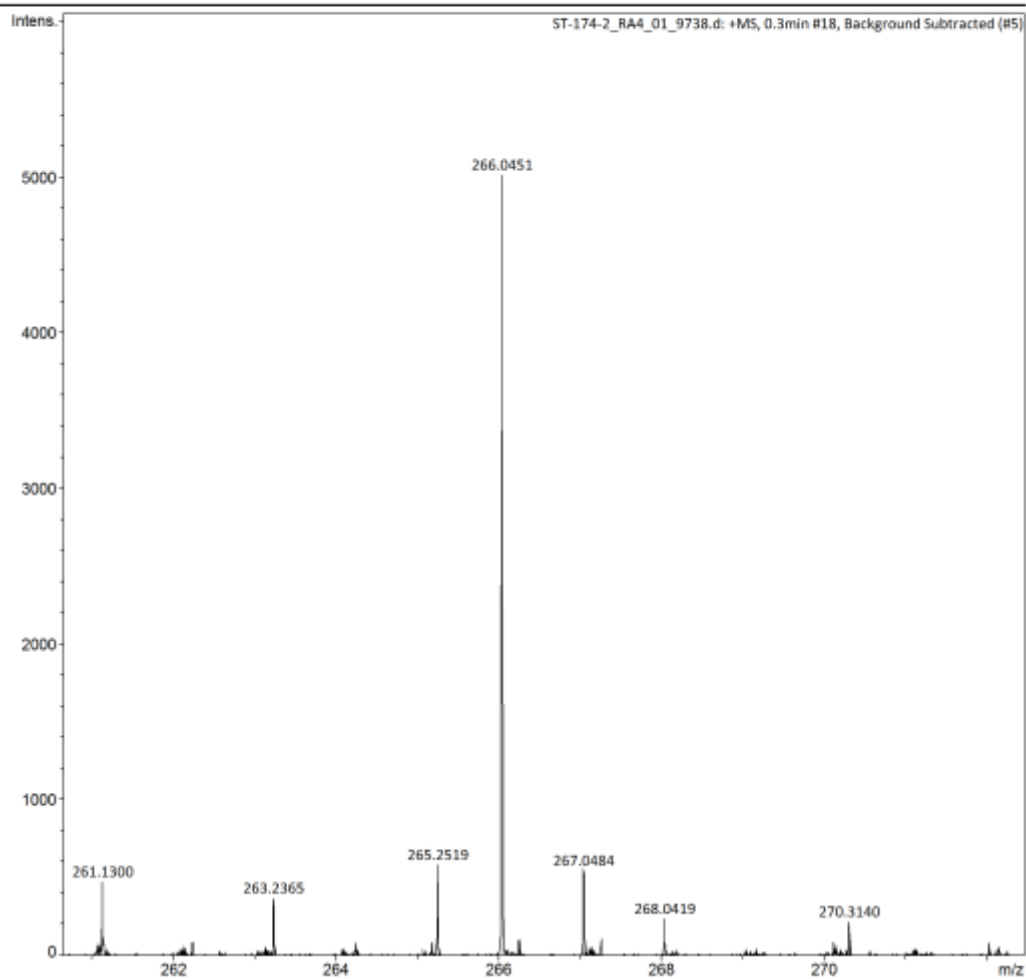

HRMS (ESI, m/z) calcd for C<sub>10</sub>H<sub>10</sub>F<sub>3</sub>NO<sub>2</sub>S [M+H]<sup>+</sup> 266.0457, found 266.0451.

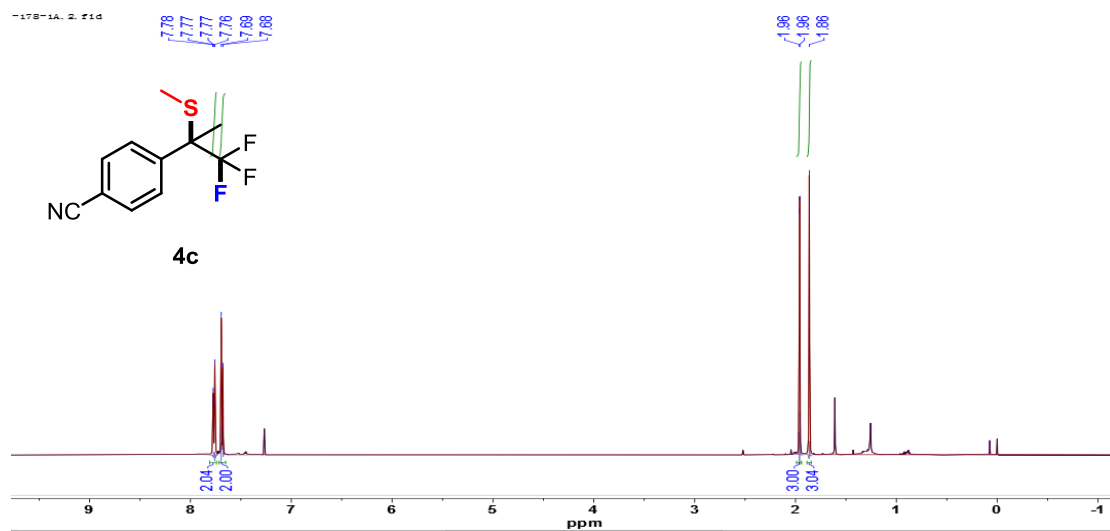

<sup>1</sup>H NMR spectrum at 500 MHz in CDCl<sub>3</sub>

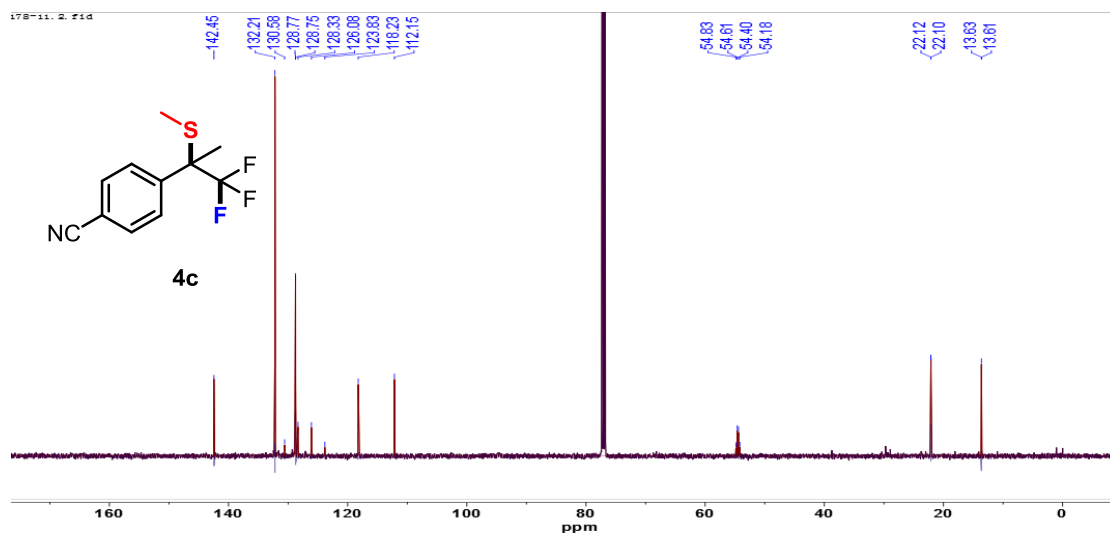

<sup>13</sup>C NMR spectrum at 126 MHz in CDCl<sub>3</sub>

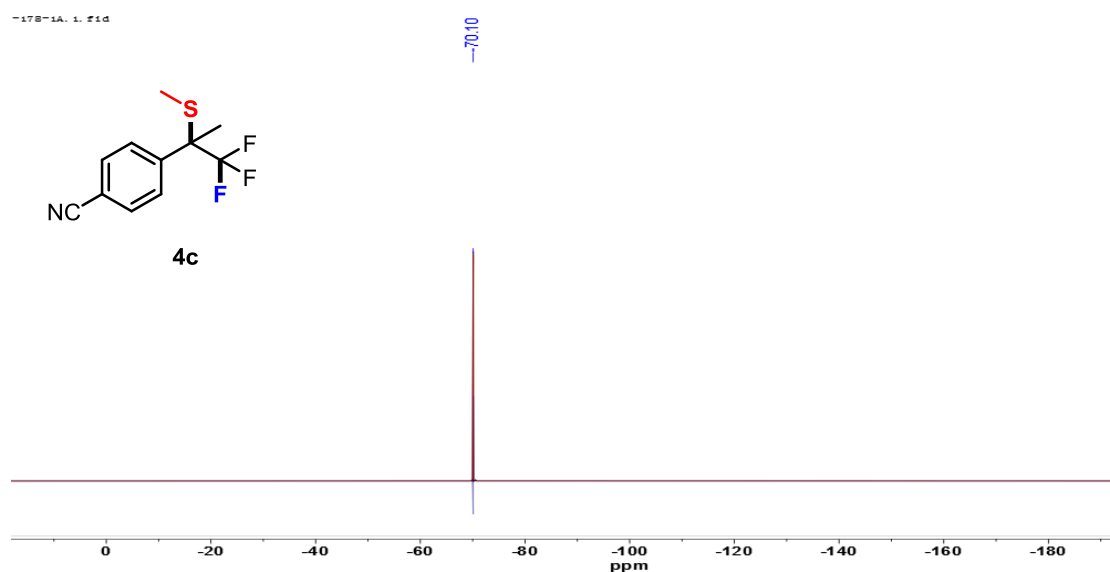

<sup>19</sup>F NMR spectrum at 471 MHz in CDCl<sub>3</sub>

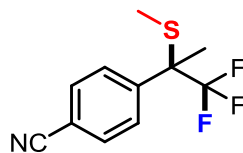

**4c**

Chemical Formula: C<sub>11</sub>H<sub>10</sub>F<sub>3</sub>NS

Exact Mass: 245.0486

Molecular Weight: 245.2632

m/z: 245.0486 (100.0%), 246.0520 (11.9%), 247.0444 (4.5%)

Elemental Analysis: C, 53.87; H, 4.11; F, 23.24; N, 5.71; S, 13.07

**Acquisition Parameter**

|             |            |                      |          |                  |           |
|-------------|------------|----------------------|----------|------------------|-----------|
| Source Type | ESI        | Ion Polarity         | Positive | Set Nebulizer    | 0.4 Bar   |
| Focus       | Not active | Set Capillary        | 2600 V   | Set Dry Heater   | 180 °C    |
| Scan Begin  | 50 m/z     | Set End Plate Offset | -500 V   | Set Dry Gas      | 4.0 l/min |
| Scan End    | 3000 m/z   | Set Charging Voltage | 2000 V   | Set Divert Valve | Source    |
|             |            | Set Corona           | 0 nA     | Set APCI Heater  | 0 °C      |

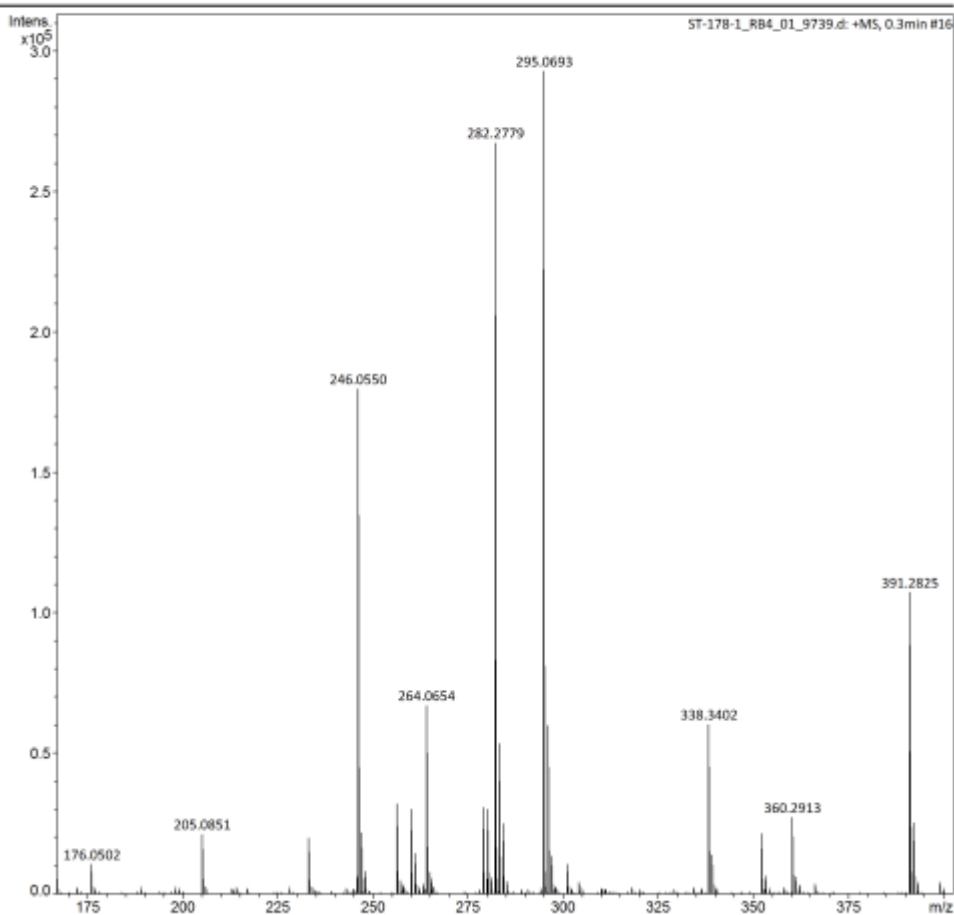

ST-178-1\_RB4\_01\_9739.d

HRMS (ESI, m/z) calcd for C<sub>11</sub>H<sub>10</sub>F<sub>3</sub>NS [M+H]<sup>+</sup> 246.0559, found 246.0550.

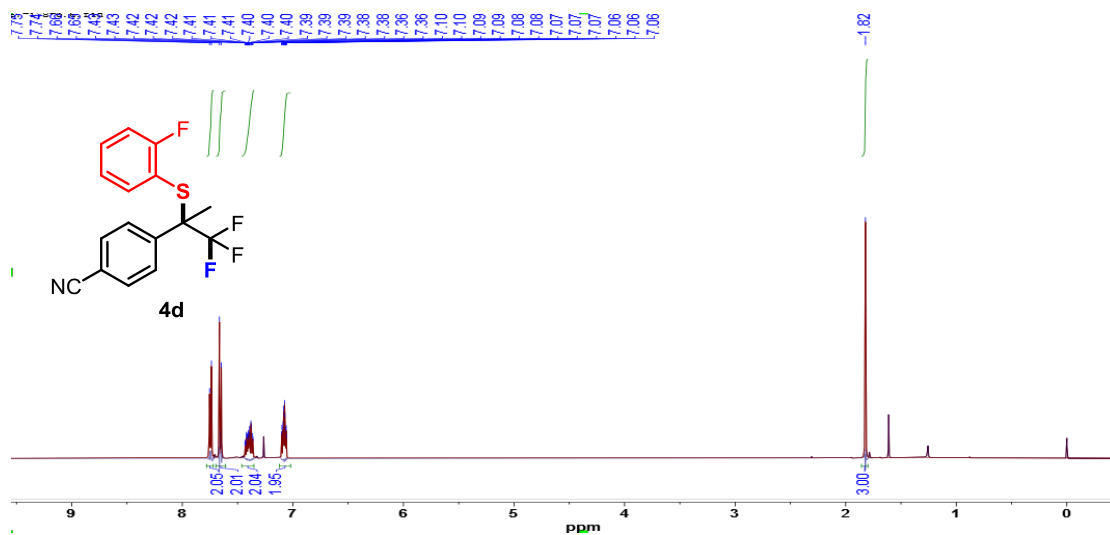

<sup>1</sup>H NMR spectrum at 500 MHz in CDCl<sub>3</sub>

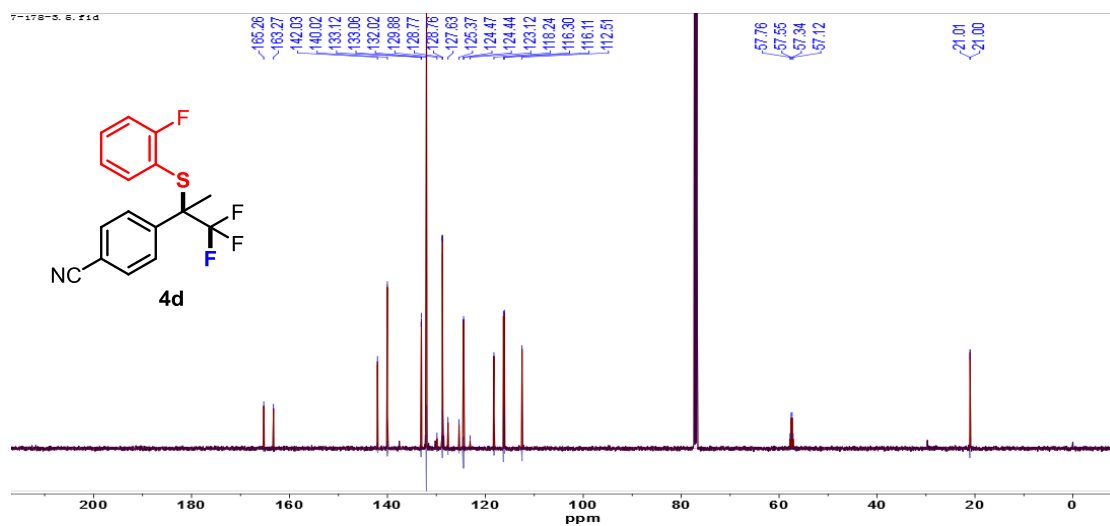

<sup>13</sup>C NMR spectrum at 126 MHz in CDCl<sub>3</sub>

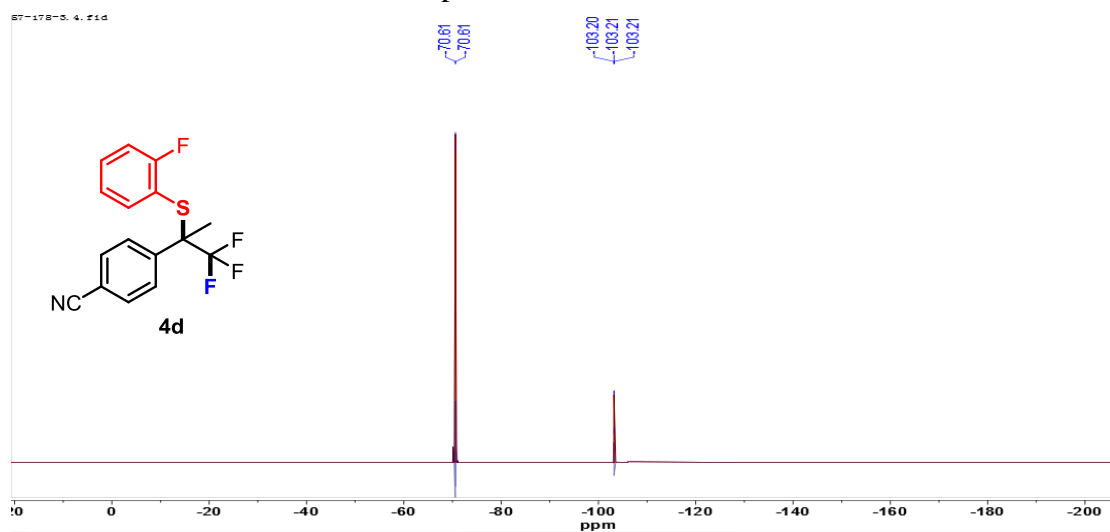

<sup>19</sup>F NMR spectrum at 471 MHz in CDCl<sub>3</sub>

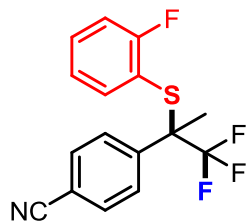

**4d**

Chemical Formula: C<sub>16</sub>H<sub>11</sub>F<sub>4</sub>NS

Exact Mass: 325.0548

Molecular Weight: 325.3246

m/z: 325.0548 (100.0%), 326.0582 (17.3%), 327.0506 (4.5%), 327.0615 (1.4%)

Elemental Analysis: C, 59.07; H, 3.41; F, 23.36; N, 4.31; S, 9.85

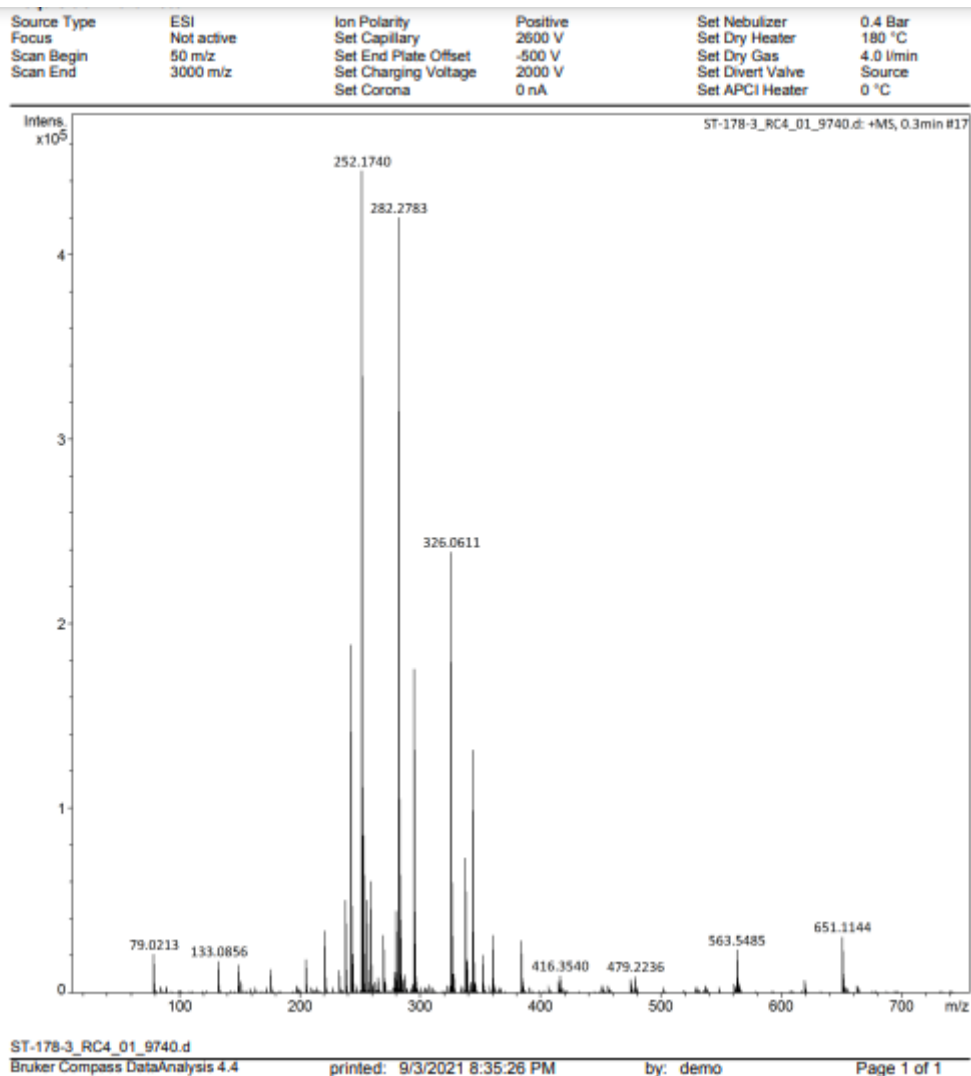

HRMS (ESI, m/z) calcd for C<sub>16</sub>H<sub>11</sub>F<sub>4</sub>NS [M+H]<sup>+</sup> 326.0621, found 326.0611.

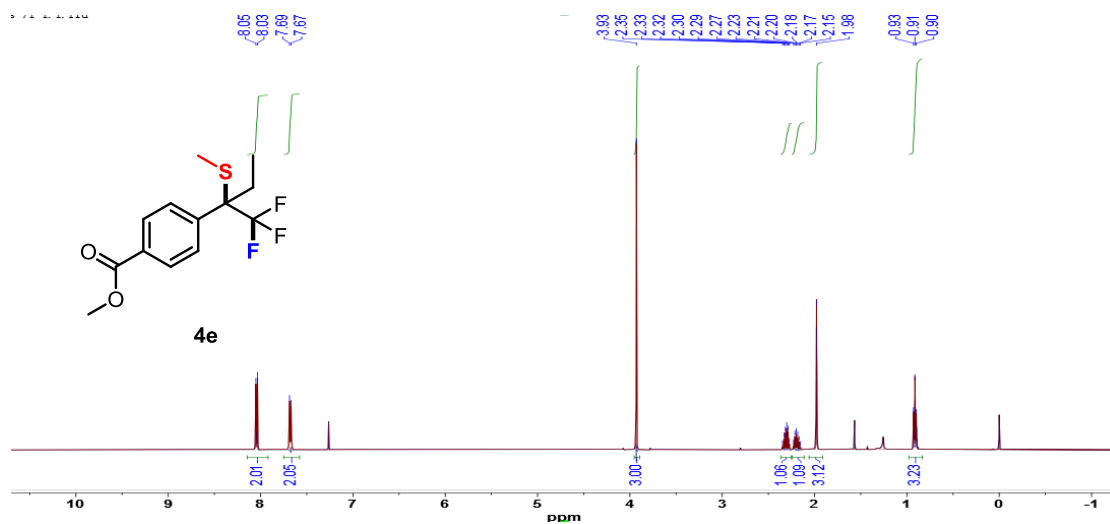

<sup>1</sup>H NMR spectrum at 500 MHz in CDCl<sub>3</sub>

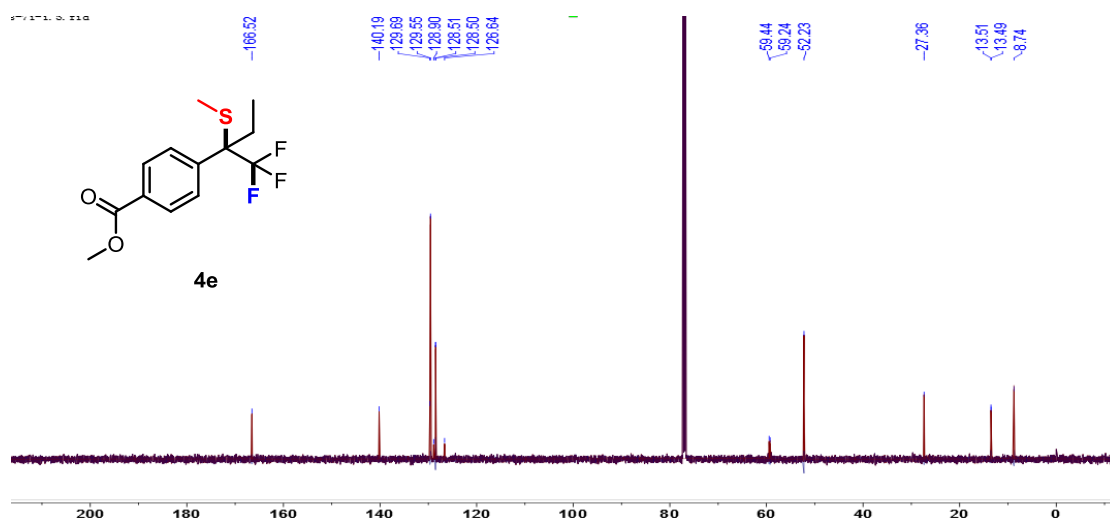

<sup>13</sup>C NMR spectrum at 126 MHz in CDCl<sub>3</sub>

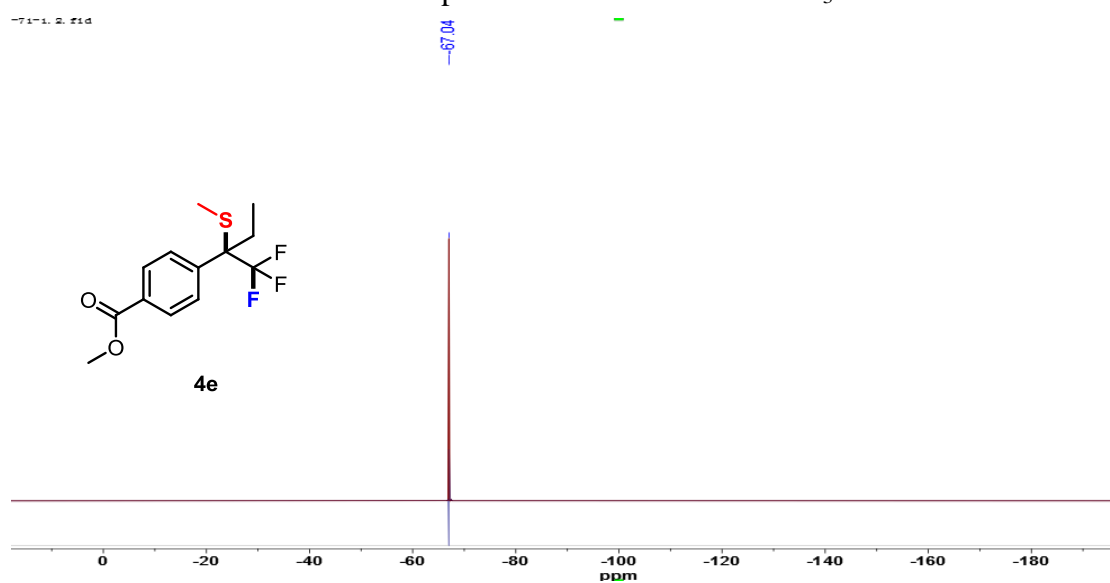

<sup>19</sup>F NMR spectrum at 471 MHz in CDCl<sub>3</sub>

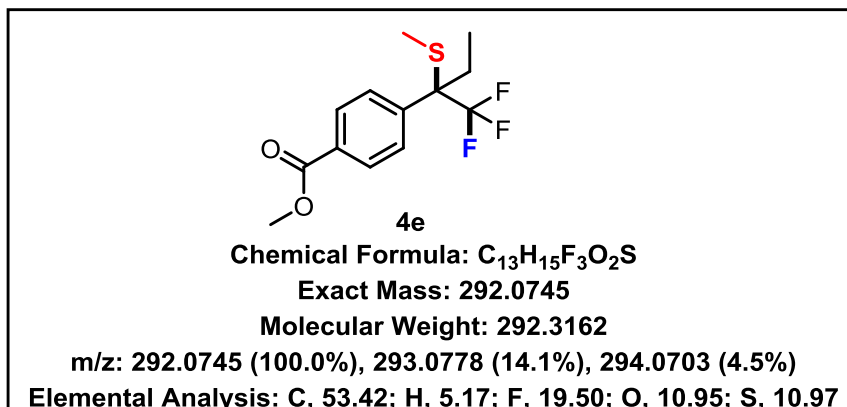

|             |               |            |           |               |
|-------------|---------------|------------|-----------|---------------|
| Method      | LC_TEST_001.m | Operator   | demo      |               |
| Sample Name | ST-190        | Instrument | impact II | 1825265.10256 |
| Comment     |               |            |           |               |

**Acquisition Parameter**

|             |            |                      |          |                  |           |
|-------------|------------|----------------------|----------|------------------|-----------|
| Source Type | ESI        | Ion Polarity         | Positive | Set Nebulizer    | 0.4 Bar   |
| Focus       | Not active | Set Capillary        | 2800 V   | Set Dry Heater   | 180 °C    |
| Scan Begin  | 50 m/z     | Set End Plate Offset | -500 V   | Set Dry Gas      | 4.0 l/min |
| Scan End    | 3000 m/z   | Set Charging Voltage | 2000 V   | Set Divert Valve | Source    |
|             |            | Set Corona           | 0 nA     | Set APCI Heater  | 0 °C      |

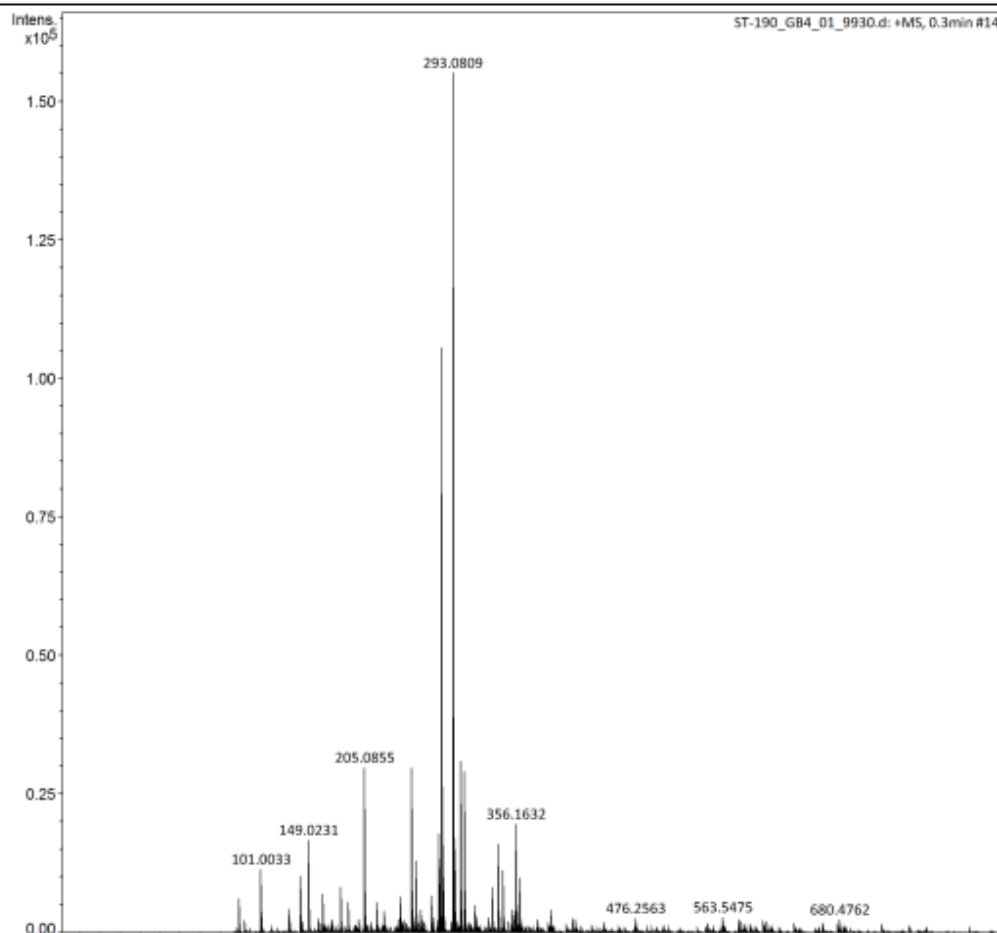

HRMS (ESI, m/z) calcd for C<sub>13</sub>H<sub>15</sub>F<sub>3</sub>O<sub>2</sub>S [M+H]<sup>+</sup> 293.0818, found 293.0809.

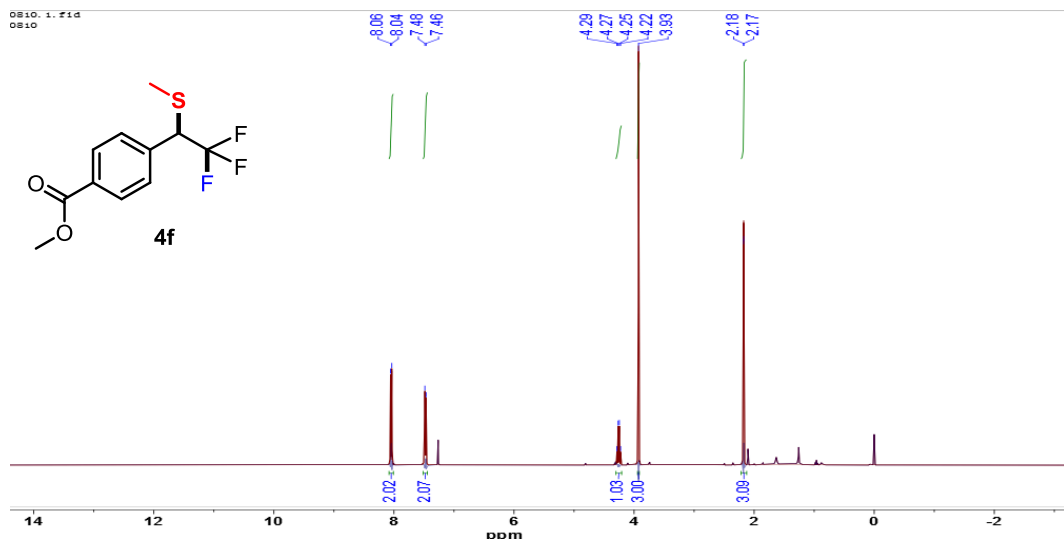

$^1\text{H}$  NMR spectrum at 400 MHz in  $\text{CDCl}_3$

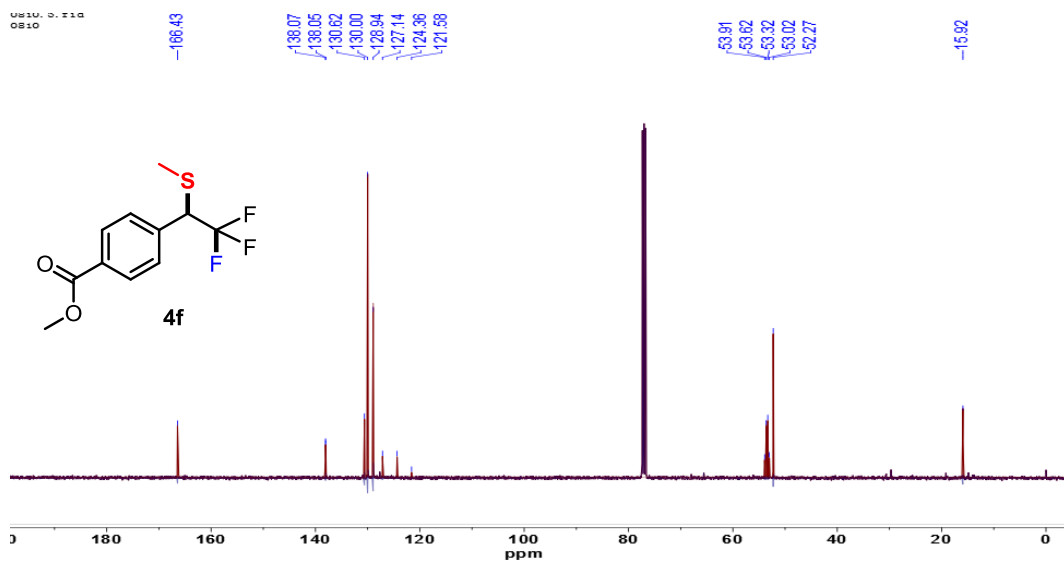

$^{13}\text{C}$  NMR spectrum at 101 MHz in  $\text{CDCl}_3$

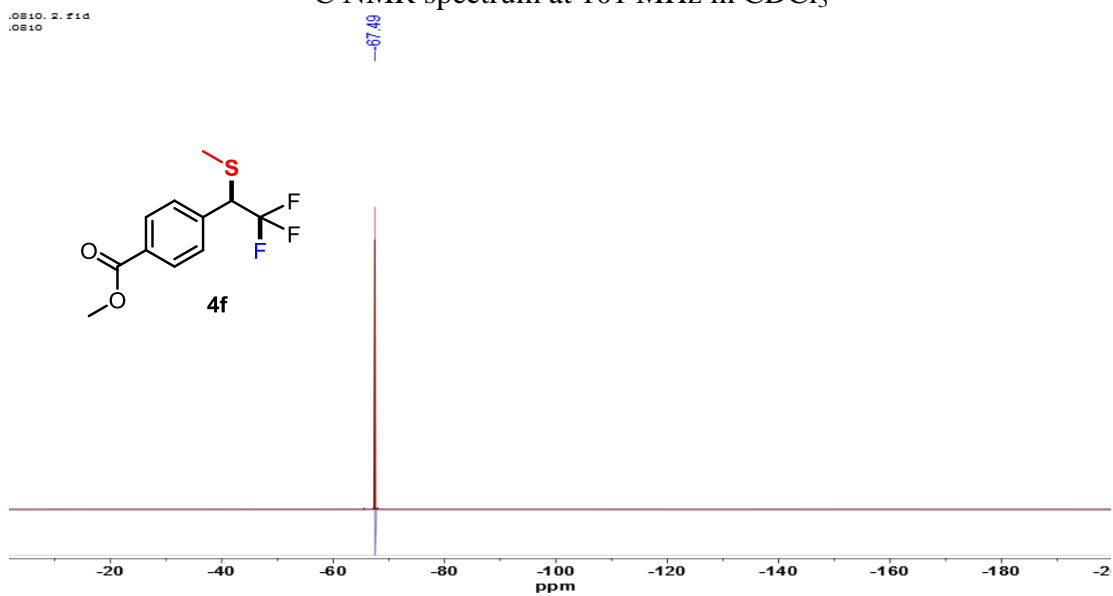

$^{19}\text{F}$  NMR spectrum at 376 MHz in  $\text{CDCl}_3$



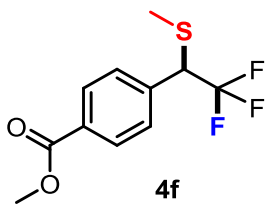

**Chemical Formula: C<sub>11</sub>H<sub>11</sub>F<sub>3</sub>O<sub>2</sub>S**

**Exact Mass: 264.0432**

**Molecular Weight: 264.2622**

**m/z: 264.0432 (100.0%), 265.0465 (11.9%), 266.0390 (4.5%)**

**Elemental Analysis: C, 50.00; H, 4.20; F, 21.57; O, 12.11; S, 12.13**

**Acquisition Parameter**

|             |            |                      |          |                  |           |
|-------------|------------|----------------------|----------|------------------|-----------|
| Source Type | ESI        | Ion Polarity         | Positive | Set Nebulizer    | 0.4 Bar   |
| Focus       | Not active | Set Capillary        | 2600 V   | Set Dry Heater   | 180 °C    |
| Scan Begin  | 50 m/z     | Set End Plate Offset | -500 V   | Set Dry Gas      | 4.0 l/min |
| Scan End    | 1600 m/z   | Set Charging Voltage | 2000 V   | Set Divert Valve | Source    |
|             |            | Set Corona           | 0 nA     | Set APCI Heater  | 0 °C      |

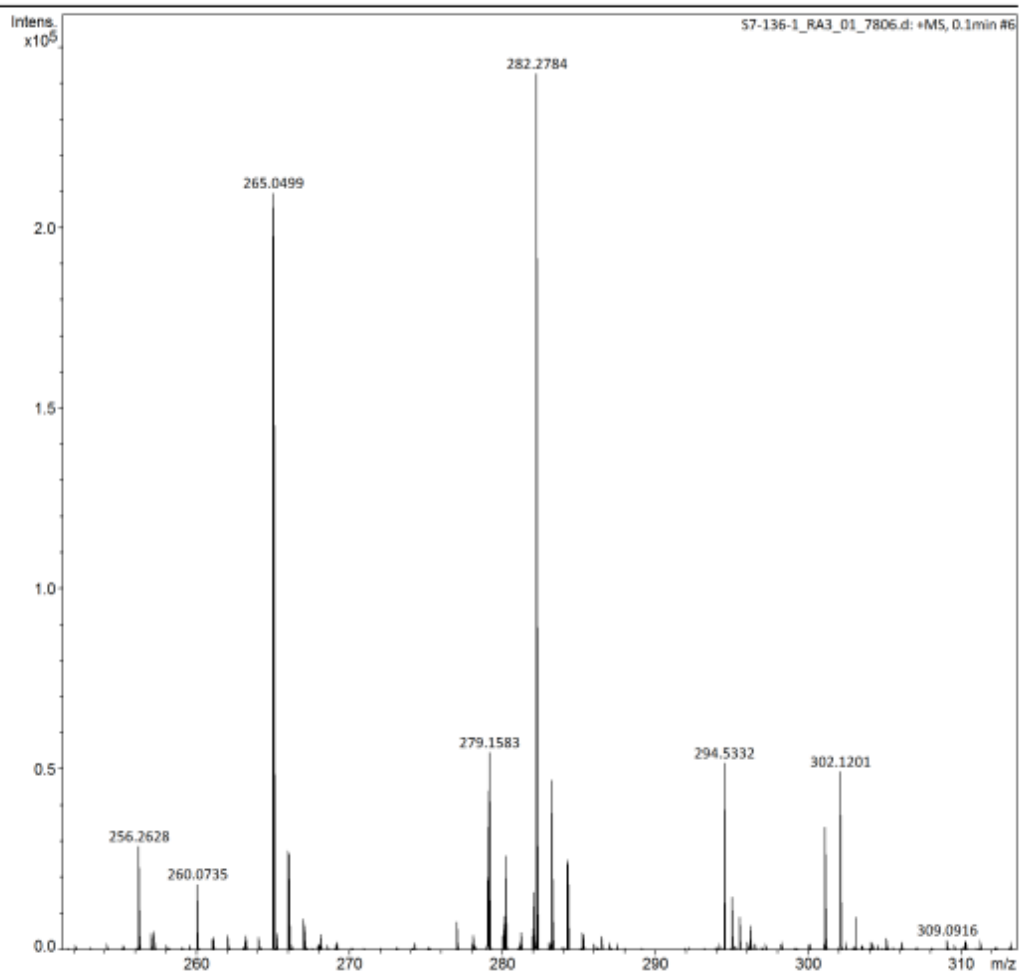

HRMS (ESI, m/z) calcd for C<sub>11</sub>H<sub>11</sub>F<sub>3</sub>O<sub>2</sub>S [M+H]<sup>+</sup> 265.0505, found 265.0499.

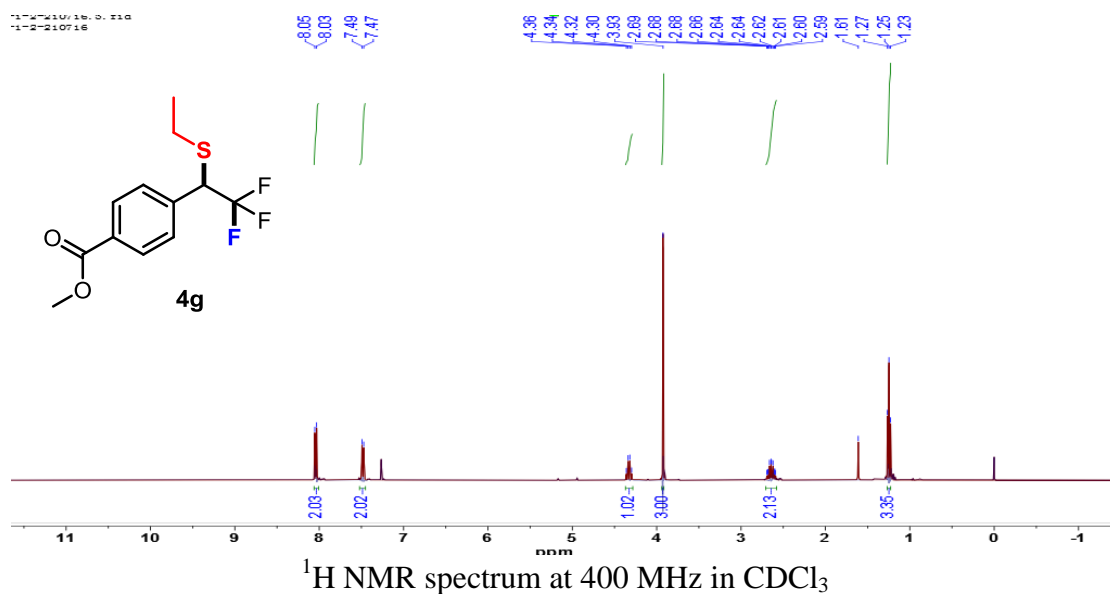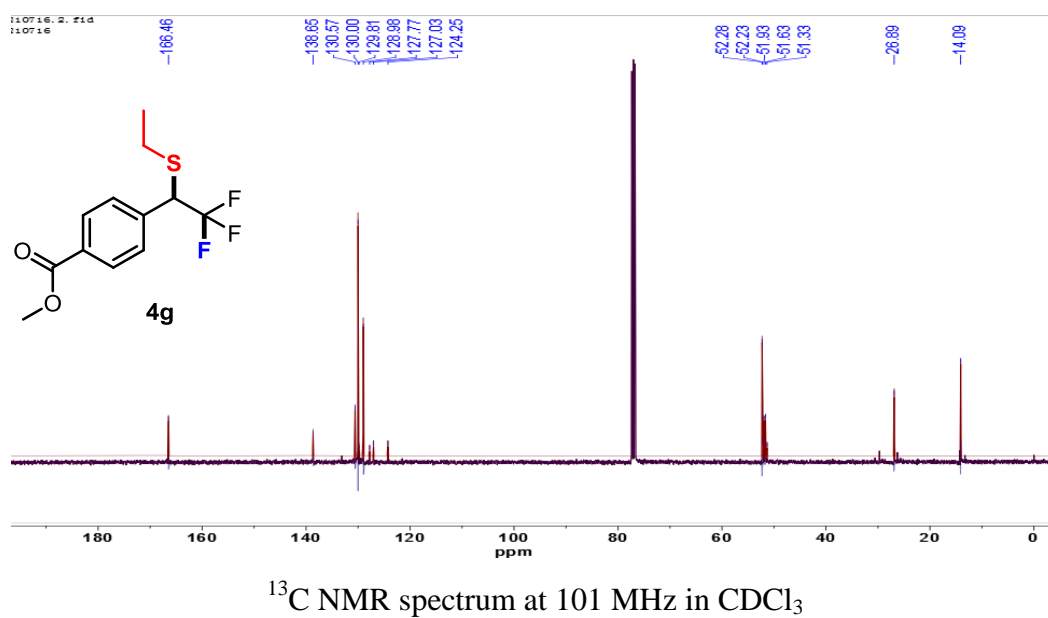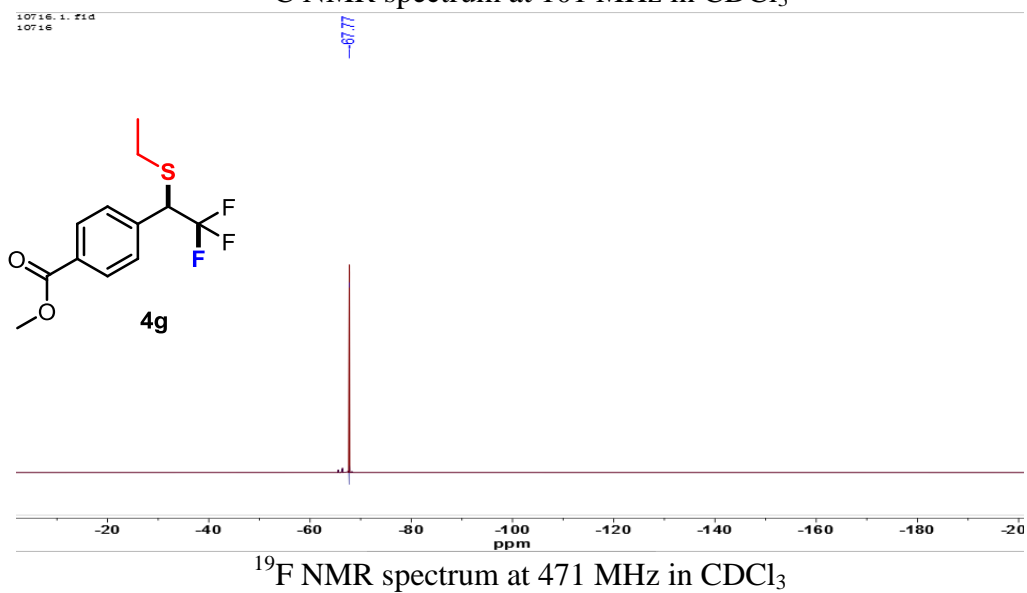

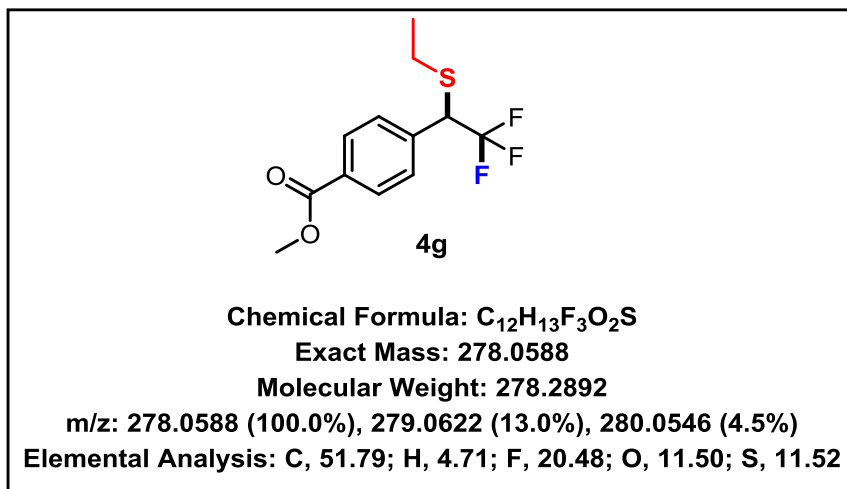

| Acquisition Parameter |            |                      |          |                  |           |
|-----------------------|------------|----------------------|----------|------------------|-----------|
| Source Type           | ESI        | Ion Polarity         | Positive | Set Nebulizer    | 0.4 Bar   |
| Focus                 | Not active | Set Capillary        | 2600 V   | Set Dry Heater   | 180 °C    |
| Scan Begin            | 50 m/z     | Set End Plate Offset | -500 V   | Set Dry Gas      | 4.0 l/min |
| Scan End              | 1600 m/z   | Set Charging Voltage | 2000 V   | Set Divert Valve | Source    |
|                       |            | Set Corona           | 0 nA     | Set APCI Heater  | 0 °C      |

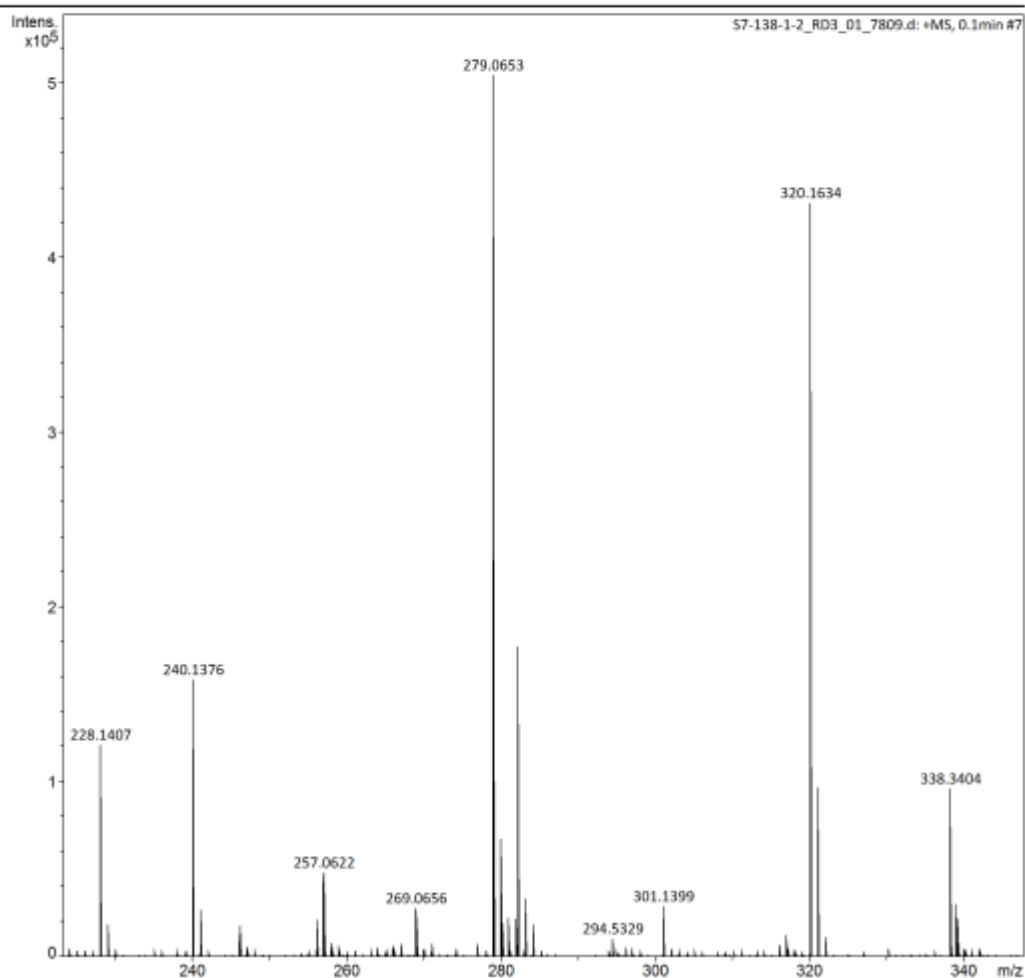

HRMS (ESI, m/z) calcd for C<sub>12</sub>H<sub>13</sub>F<sub>3</sub>O<sub>2</sub>S [M+H]<sup>+</sup> 279.0661, found 279.0653.

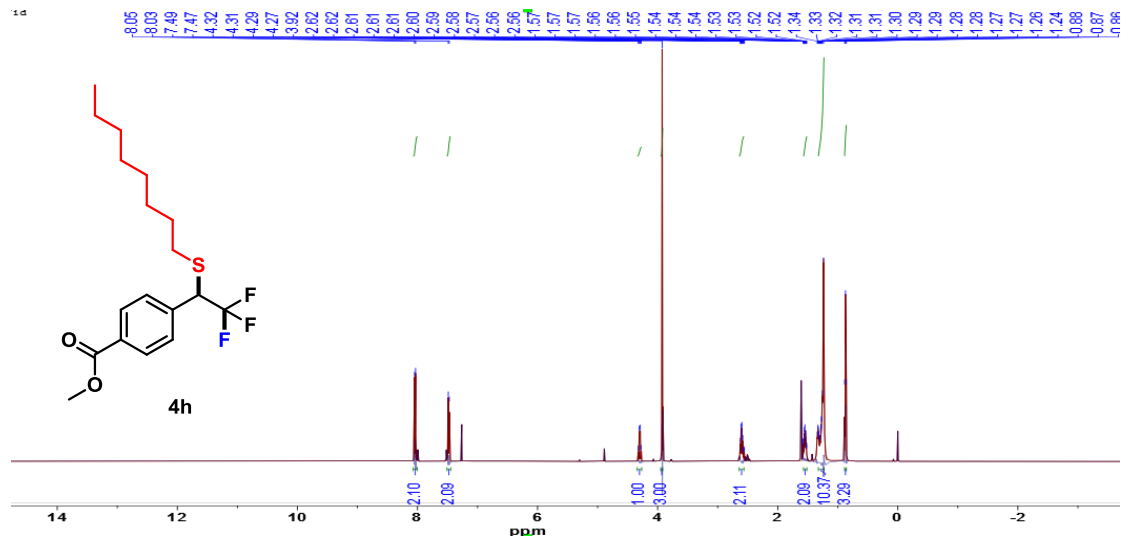

<sup>1</sup>H NMR spectrum at 500 MHz in CDCl<sub>3</sub>

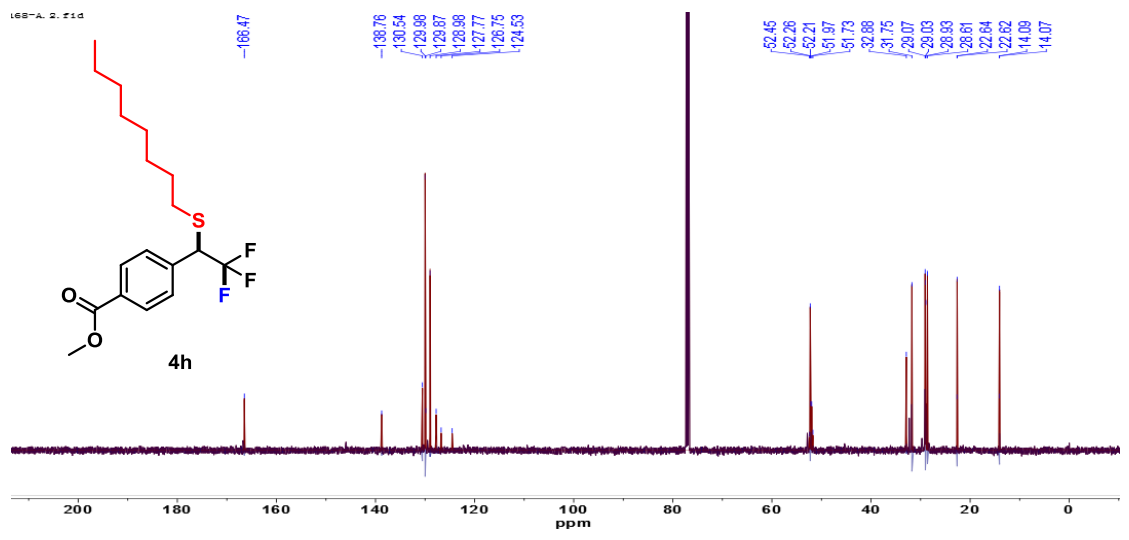

<sup>13</sup>C NMR spectrum at 126 MHz in CDCl<sub>3</sub>

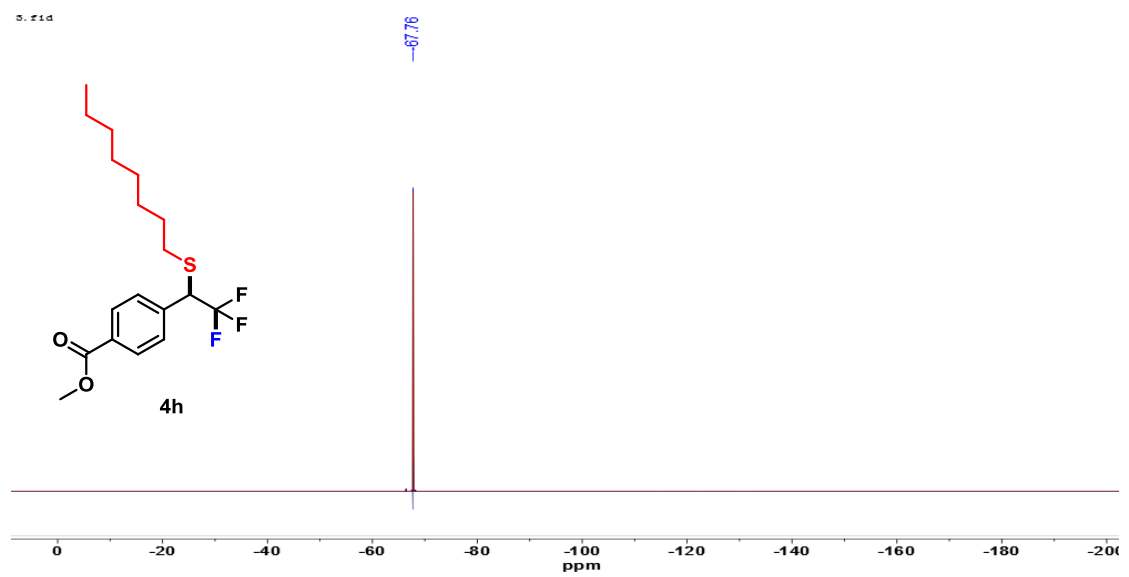

<sup>19</sup>F NMR spectrum at 471 MHz in CDCl<sub>3</sub>

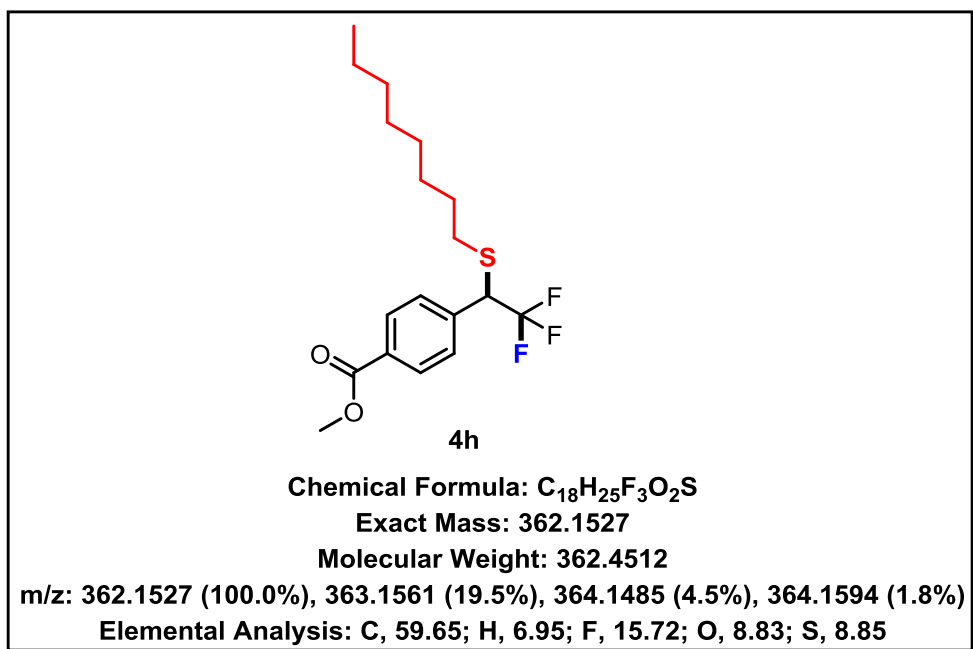

**Acquisition Parameter**

|             |            |                      |          |                  |           |
|-------------|------------|----------------------|----------|------------------|-----------|
| Source Type | ESI        | Ion Polarity         | Positive | Set Nebulizer    | 0.4 Bar   |
| Focus       | Not active | Set Capillary        | 2800 V   | Set Dry Heater   | 180 °C    |
| Scan Begin  | 50 m/z     | Set End Plate Offset | -500 V   | Set Dry Gas      | 4.0 l/min |
| Scan End    | 3000 m/z   | Set Charging Voltage | 2000 V   | Set Divert Valve | Source    |
|             |            | Set Corona           | 0 nA     | Set APCI Heater  | 0 °C      |

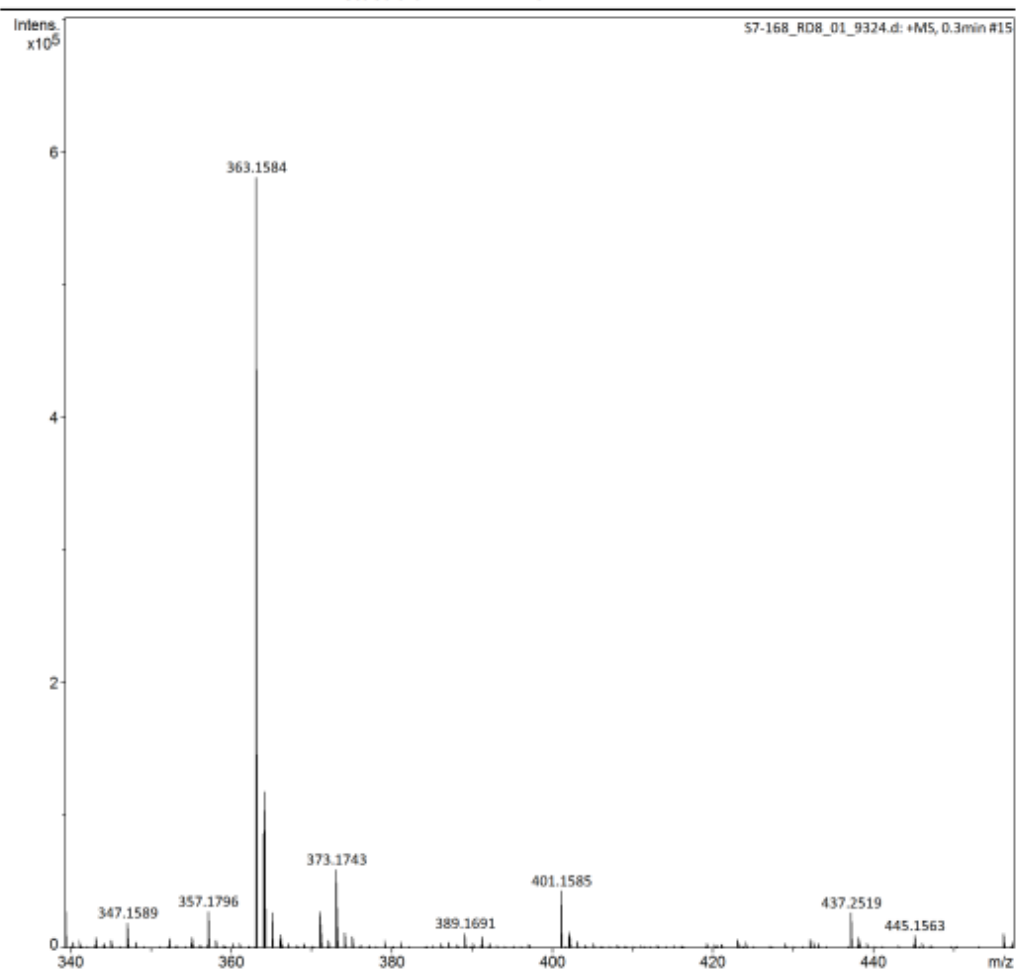

HRMS (ESI, m/z) calcd for C<sub>18</sub>H<sub>25</sub>F<sub>3</sub>O<sub>2</sub>S [M+H]<sup>+</sup> 363.1600, found 363.1584.

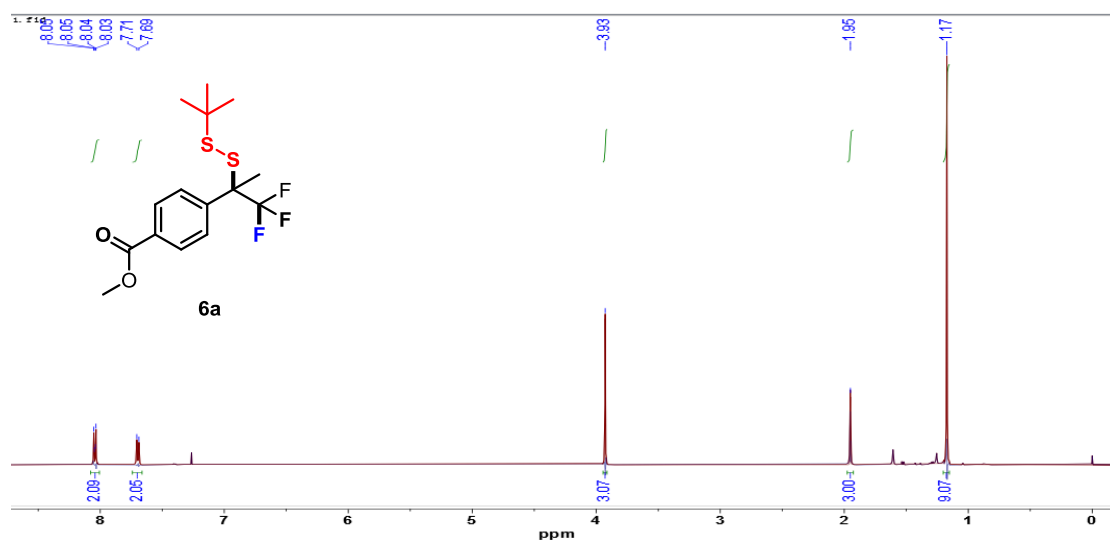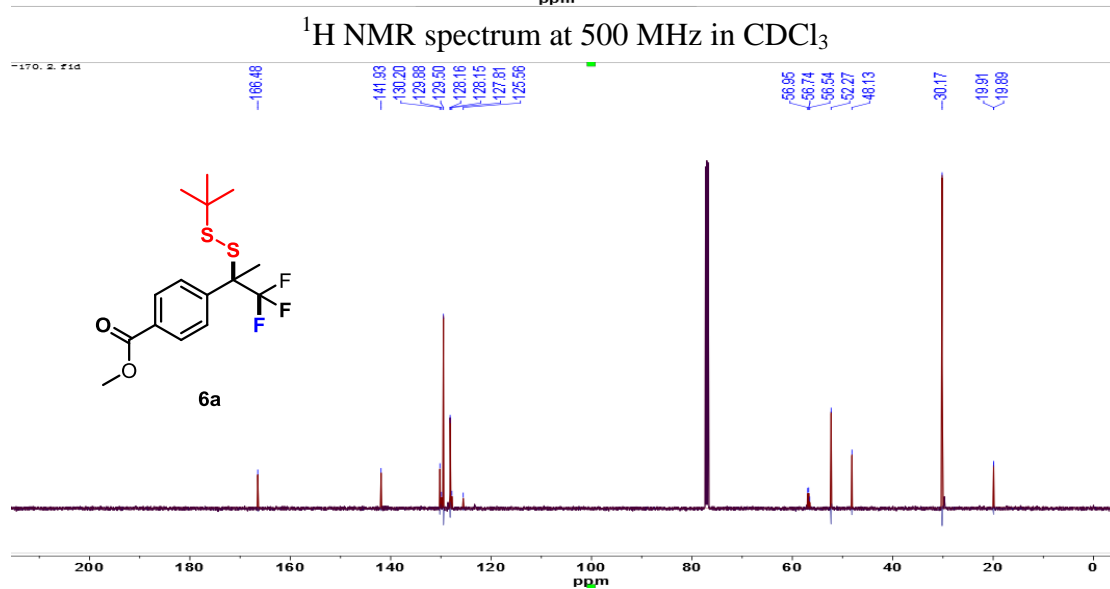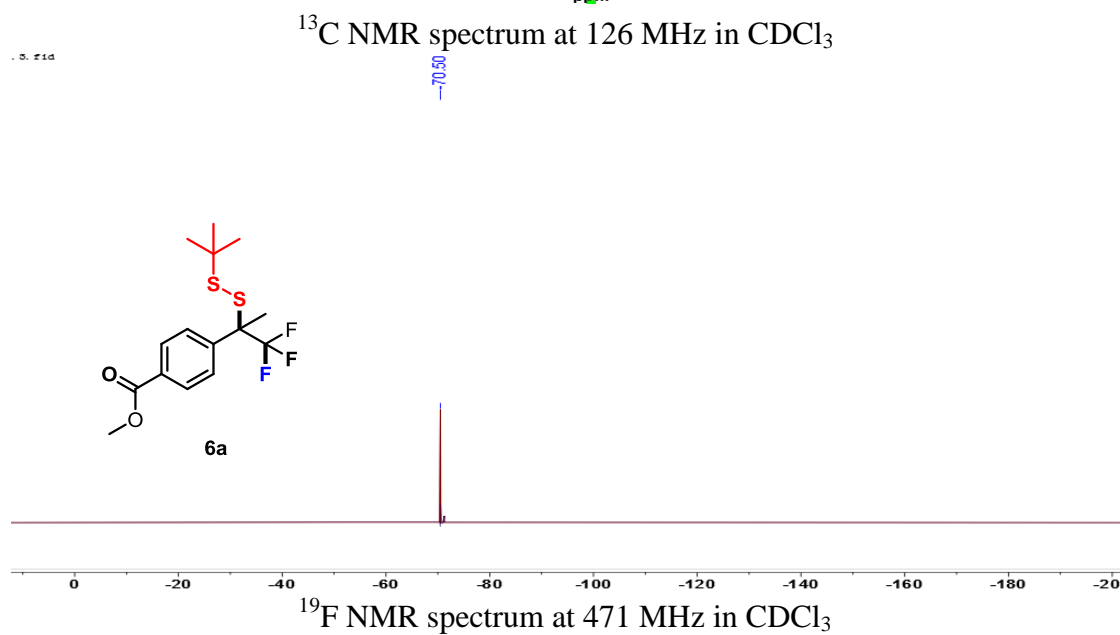

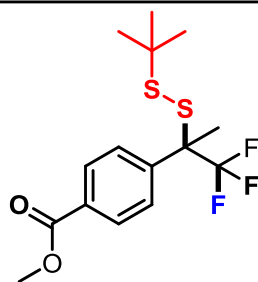

6a

Chemical Formula:  $C_{15}H_{19}F_3O_2S_2$

Exact Mass: 352.0779

Molecular Weight: 352.4302

m/z: 352.0779 (100.0%), 353.0812 (16.2%), 354.0737 (9.0%), 353.0772 (1.6%), 355.0770 (1.5%), 354.0846 (1.2%)

Elemental Analysis: C, 51.12; H, 5.43; F, 16.17; O, 9.08; S, 18.19

Acquisition Parameter

|             |            |                      |          |                  |           |
|-------------|------------|----------------------|----------|------------------|-----------|
| Source Type | ESI        | Ion Polarity         | Positive | Set Nebulizer    | 0.4 Bar   |
| Focus       | Not active | Set Capillary        | 2600 V   | Set Dry Heater   | 180 °C    |
| Scan Begin  | 50 m/z     | Set End Plate Offset | -500 V   | Set Dry Gas      | 4.0 l/min |
| Scan End    | 3000 m/z   | Set Charging Voltage | 2000 V   | Set Divert Valve | Source    |
|             |            | Set Corona           | 0 nA     | Set APCI Heater  | 0 °C      |

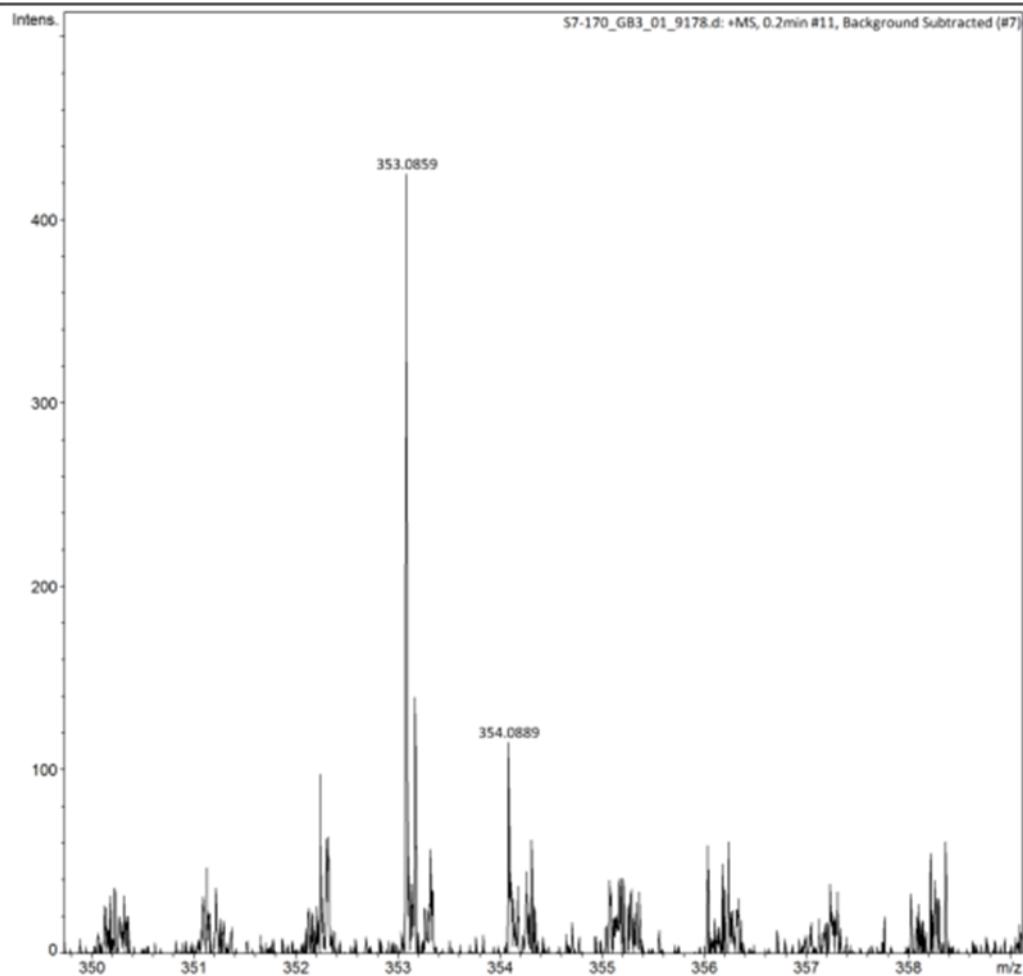

HRMS (ESI, m/z) calcd for  $C_{15}H_{19}F_3O_2S_2$  [M+H]<sup>+</sup> 353.0851, found 353.0859.

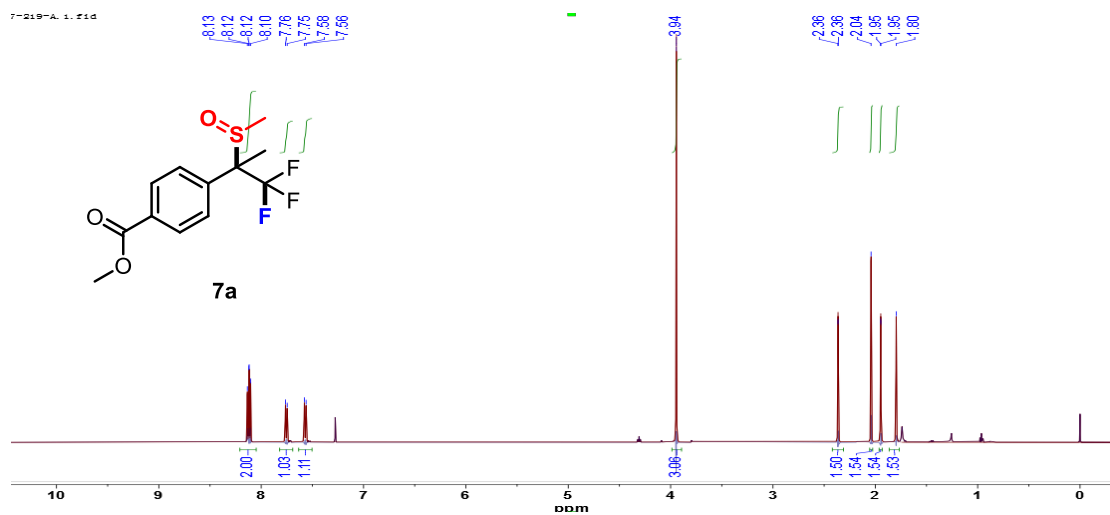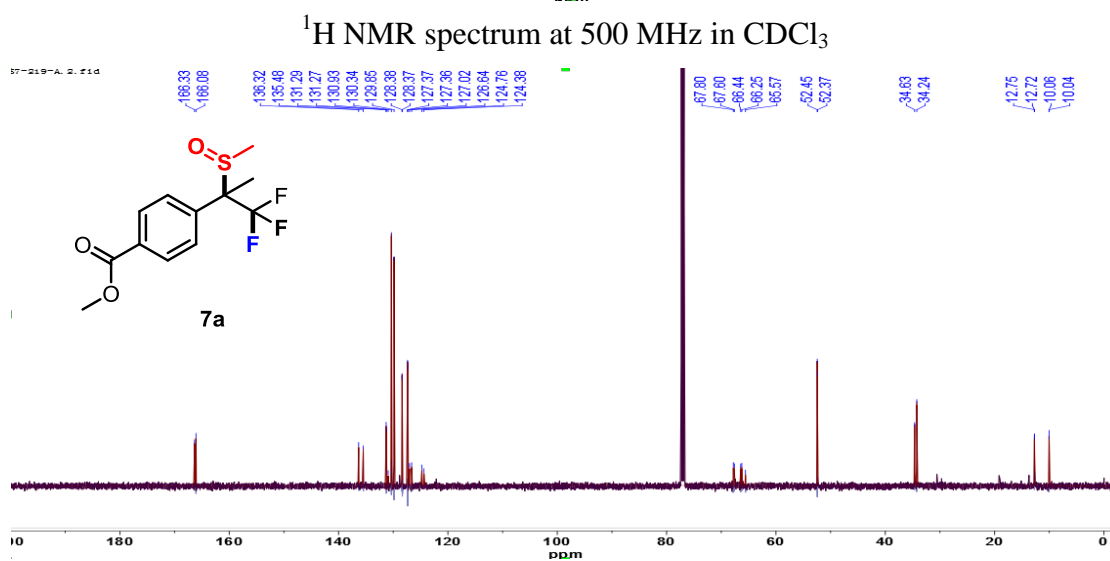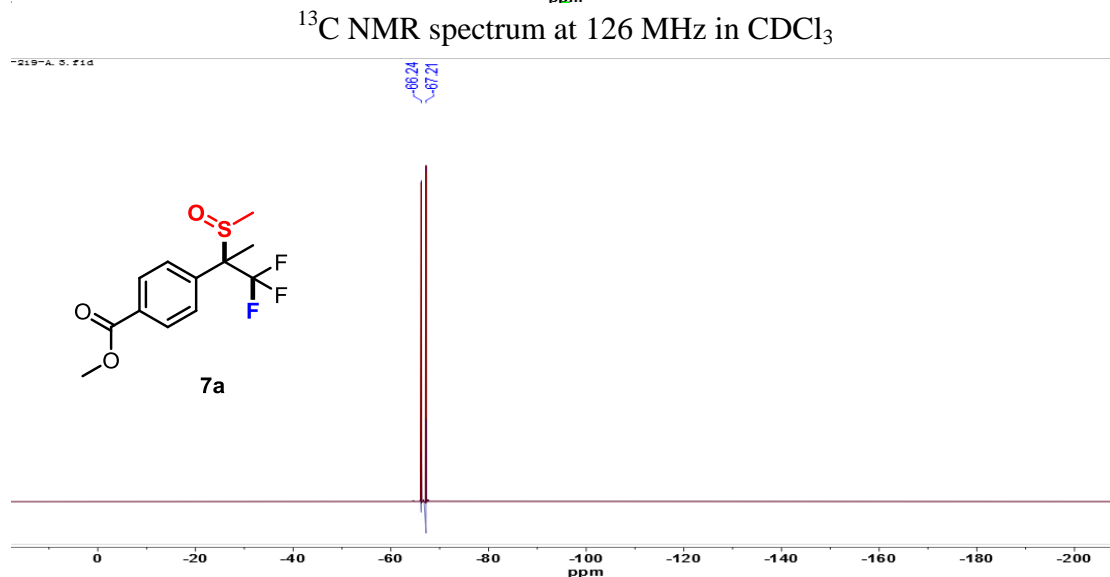



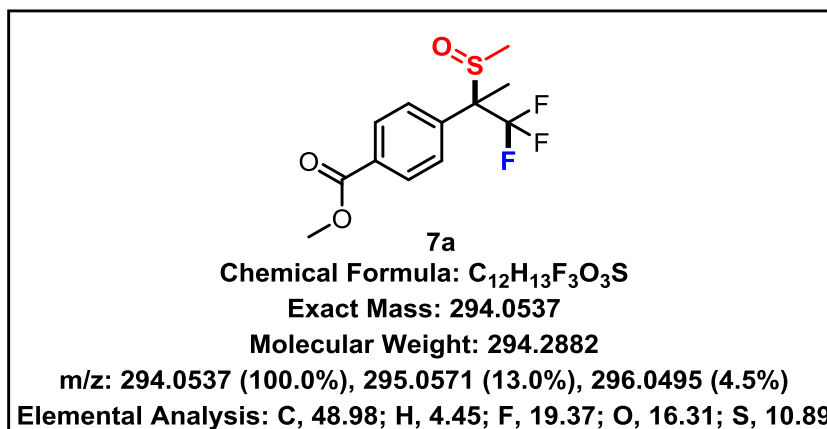

**Acquisition Parameter**

|             |            |                      |          |                  |           |
|-------------|------------|----------------------|----------|------------------|-----------|
| Source Type | ESI        | Ion Polarity         | Positive | Set Nebulizer    | 0.4 Bar   |
| Focus       | Not active | Set Capillary        | 2600 V   | Set Dry Heater   | 180 °C    |
| Scan Begin  | 50 m/z     | Set End Plate Offset | -500 V   | Set Dry Gas      | 4.0 l/min |
| Scan End    | 3000 m/z   | Set Charging Voltage | 2000 V   | Set Divert Valve | Source    |
|             |            | Set Corona           | 0 nA     | Set APCI Heater  | 0 °C      |

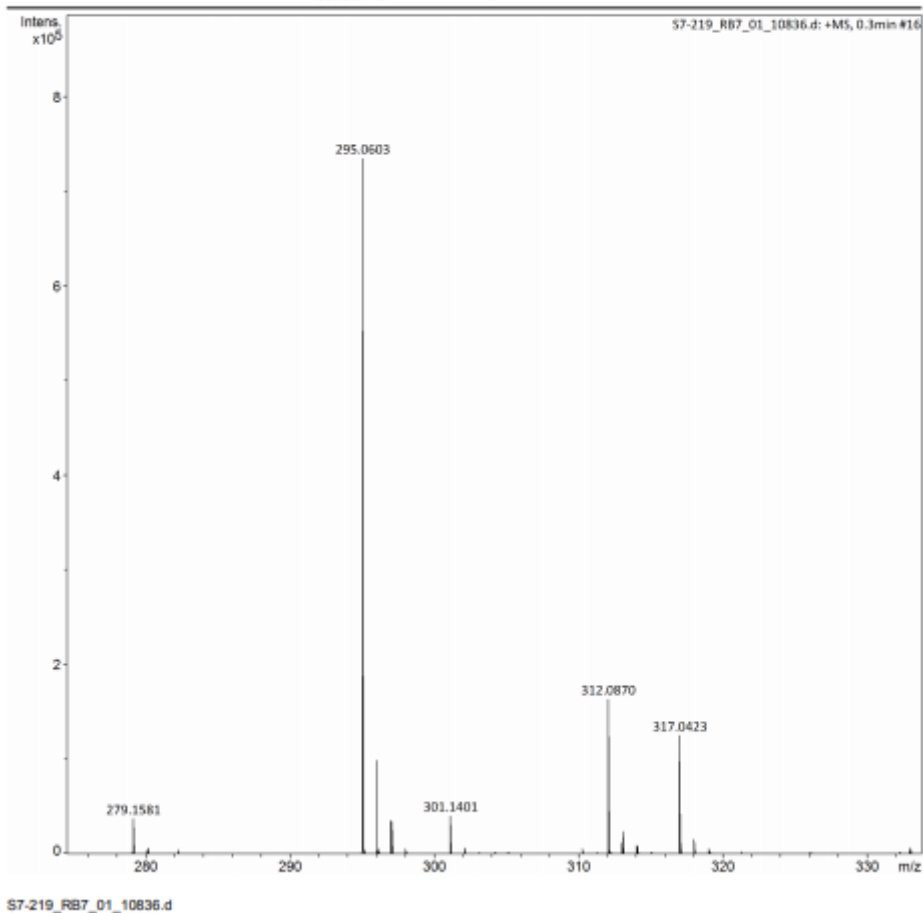

HRMS (ESI, m/z) calcd for C<sub>12</sub>H<sub>13</sub>F<sub>3</sub>O<sub>3</sub>S [M+H]<sup>+</sup> 295.0610, found 295.0603.

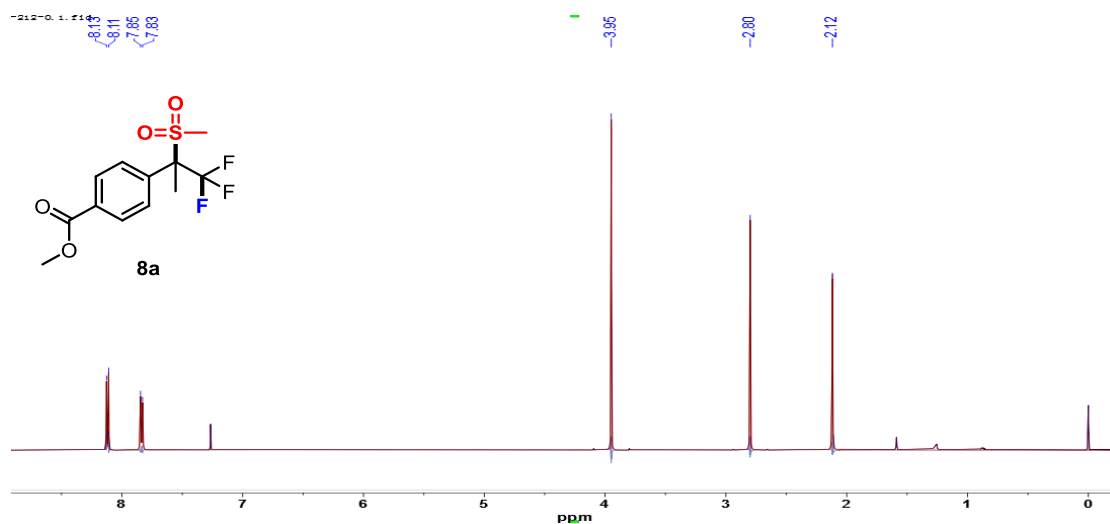

<sup>1</sup>H NMR spectrum at 500 MHz in CDCl<sub>3</sub>

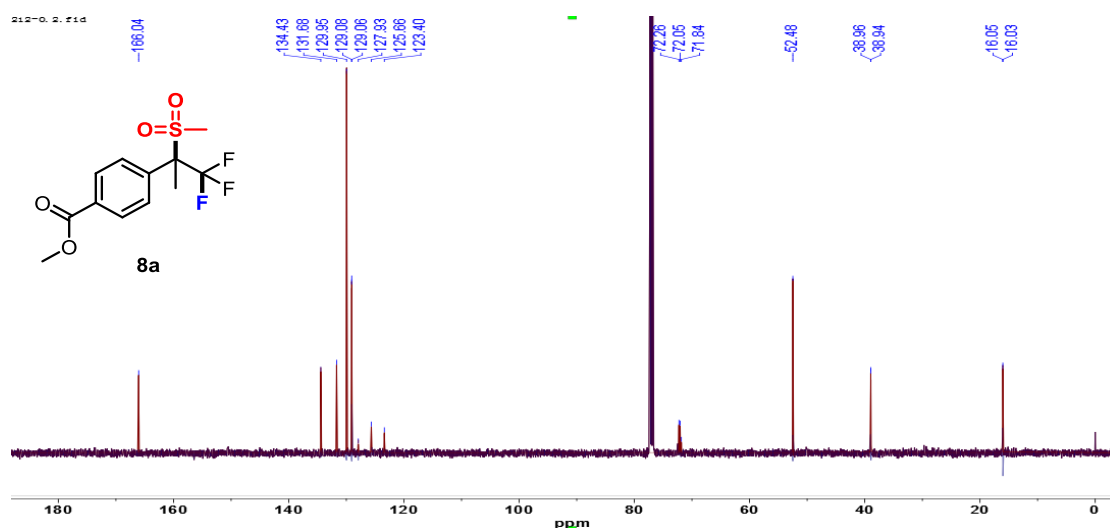

<sup>13</sup>C NMR spectrum at 126 MHz in CDCl<sub>3</sub>

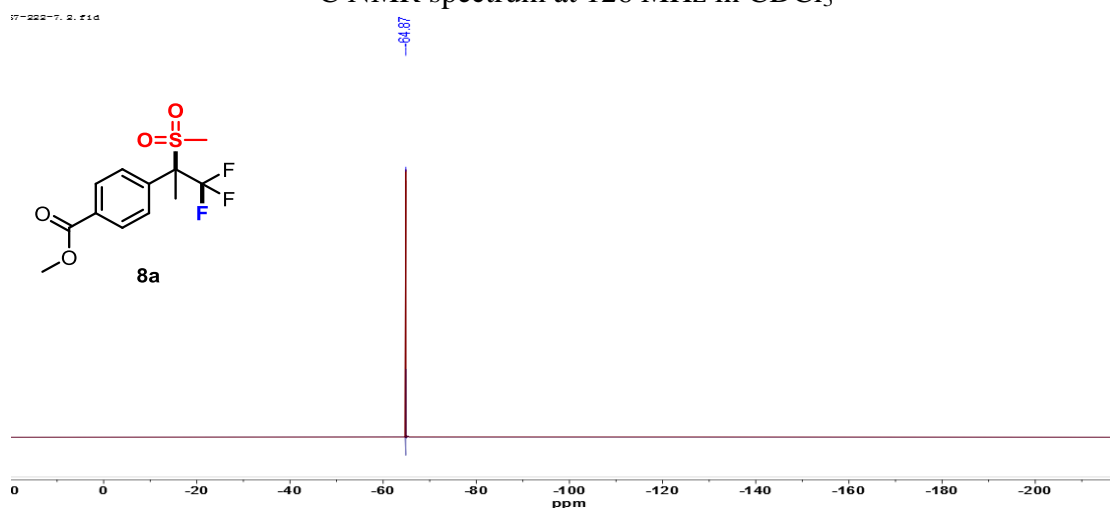

<sup>19</sup>F NMR spectrum at 471 MHz in CDCl<sub>3</sub>

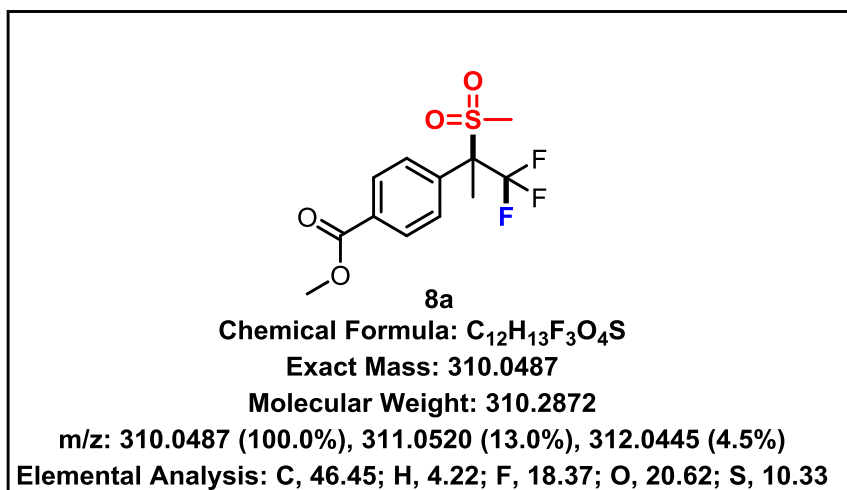

| 样品名称  | S7-222-2            | 位置          | P1-E2        | 仪器名称    | Instrument 1 | 用户名      |                    |
|-------|---------------------|-------------|--------------|---------|--------------|----------|--------------------|
| 注射量   | Unknown / Injection | InjPosition |              | 样品类型    | Sample       | IRM 校准状态 | 成功                 |
| 数据文件名 | S7-222-2.d          | 采集方法        | 0923-1-pos.m | Comment |              | 采集时间     | 2021/10/8 13:01:26 |

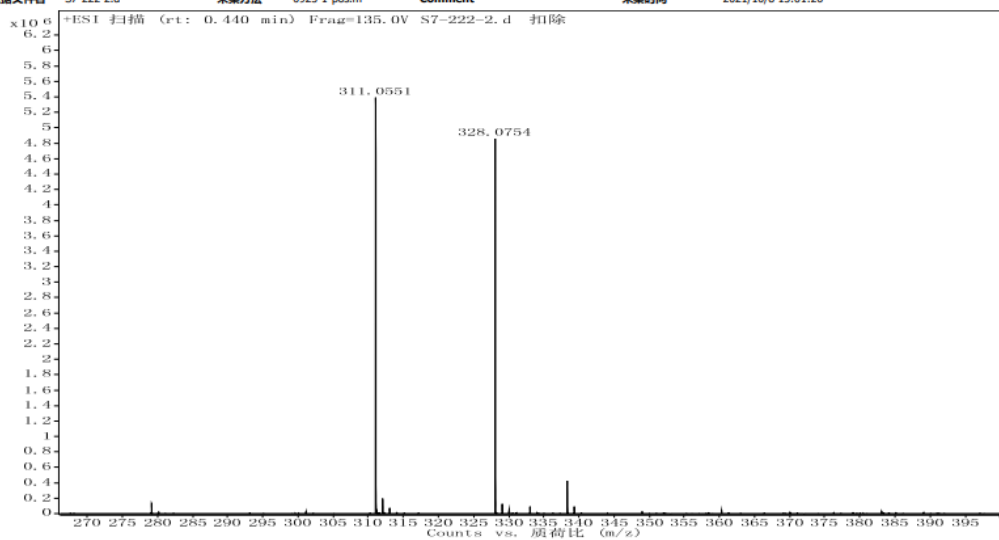

HRMS (ESI, m/z) calcd for C<sub>12</sub>H<sub>13</sub>F<sub>3</sub>O<sub>4</sub>S [M+H]<sup>+</sup> 311.0559, found 311.0551.

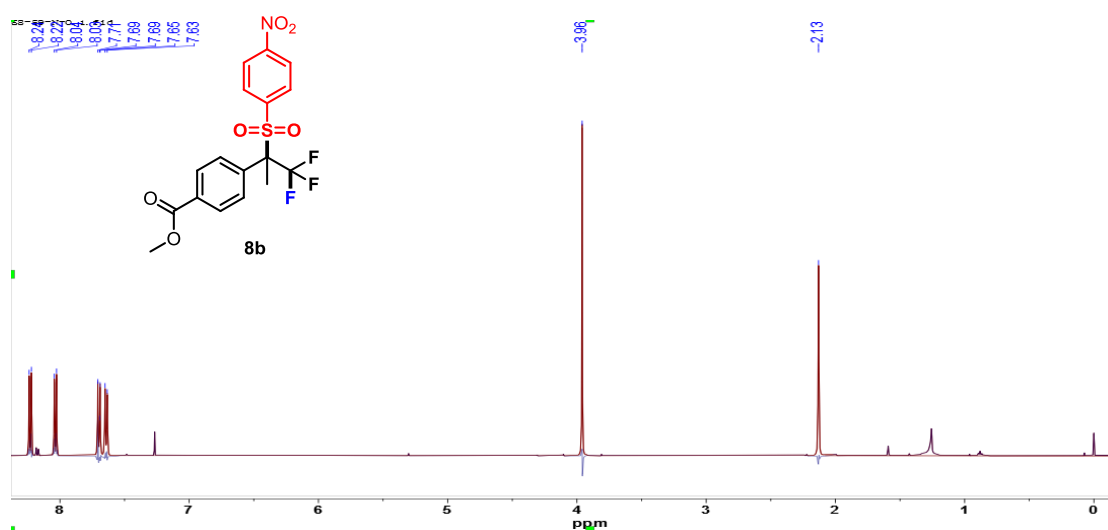

<sup>1</sup>H NMR spectrum at 500 MHz in CDCl<sub>3</sub>

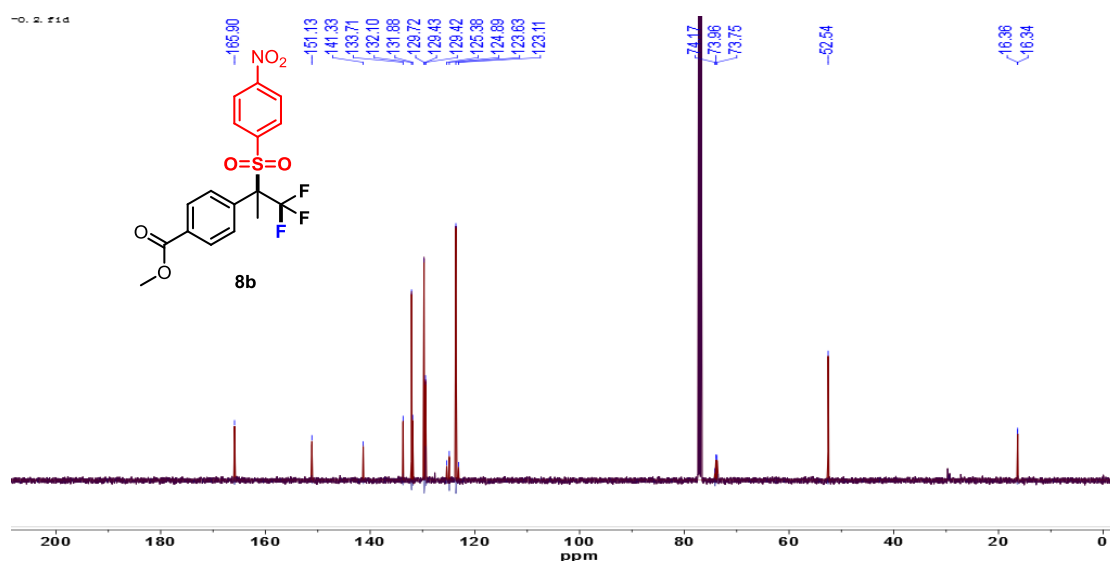

<sup>13</sup>C NMR spectrum at 126 MHz in CDCl<sub>3</sub>

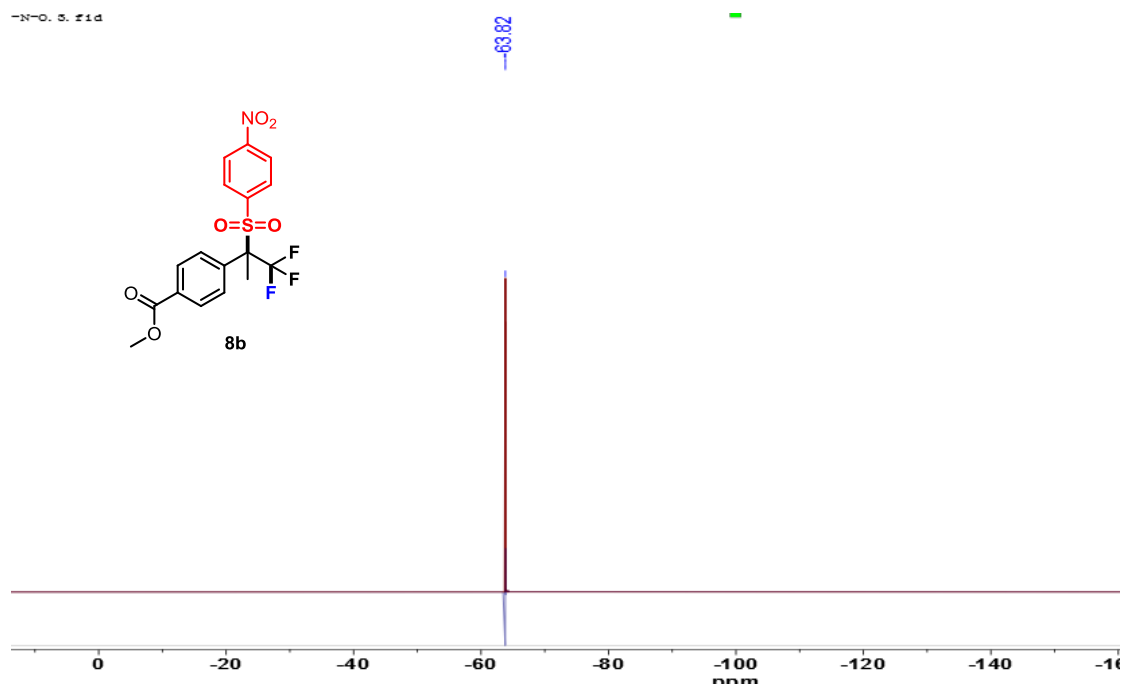

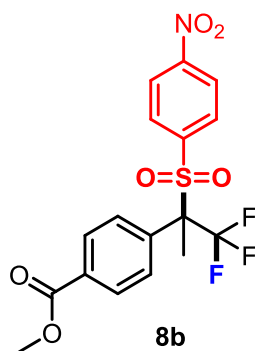

**Chemical Formula: C<sub>17</sub>H<sub>14</sub>F<sub>3</sub>NO<sub>6</sub>S**

**Exact Mass: 417.0494**

**Molecular Weight: 417.3552**

**m/z: 417.0494 (100.0%), 418.0527 (18.4%), 419.0452 (4.5%), 419.0561 (1.6%), 419.0536 (1.2%)**

**Elemental Analysis: C, 48.92; H, 3.38; F, 13.66; N, 3.36; O, 23.00; S, 7.68**

|             |               |            |               |
|-------------|---------------|------------|---------------|
| Method      | LC_TEST_001.m | Operator   | demo          |
| Sample Name | S7-210-2      | Instrument | impact II     |
| Comment     |               |            | 1825265.10256 |

| Acquisition Parameter |            |                      |          |                  |           |
|-----------------------|------------|----------------------|----------|------------------|-----------|
| Source Type           | ESI        | Ion Polarity         | Positive | Set Nebulizer    | 0.4 Bar   |
| Focus                 | Not active | Set Capillary        | 2600 V   | Set Dry Heater   | 180 °C    |
| Scan Begin            | 50 m/z     | Set End Plate Offset | -500 V   | Set Dry Gas      | 4.0 l/min |
| Scan End              | 3000 m/z   | Set Charging Voltage | 2000 V   | Set Divert Valve | Source    |
|                       |            | Set Corona           | 0 nA     | Set APCI Heater  | 0 °C      |

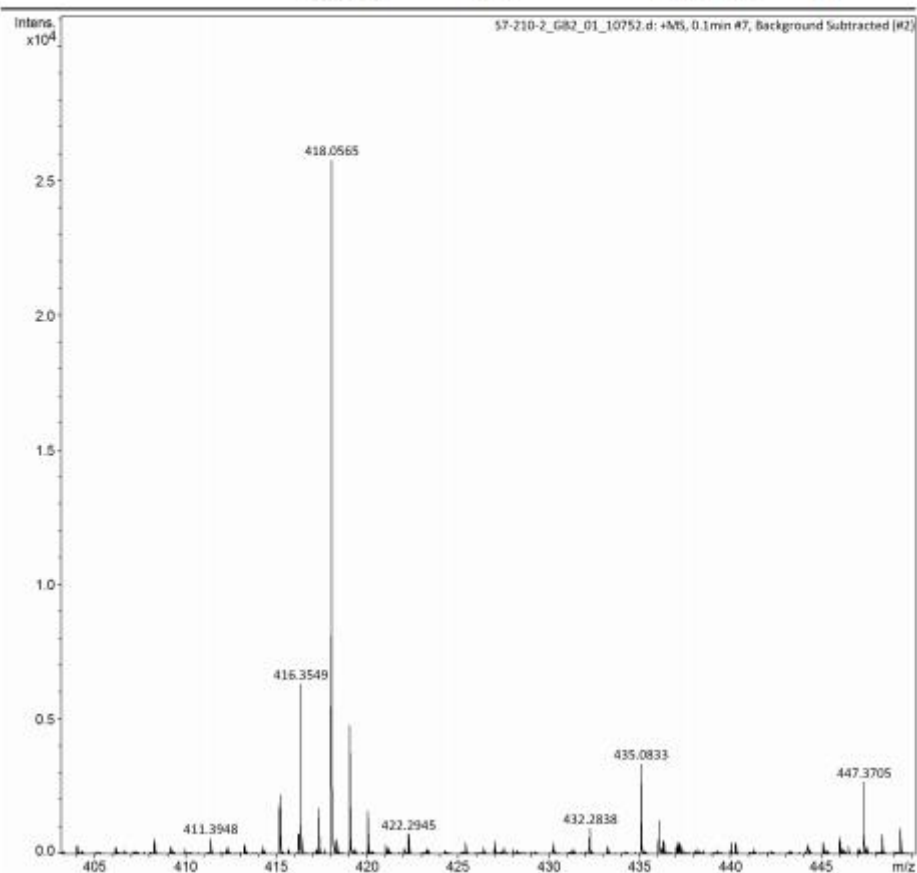

HRMS (ESI, m/z) calcd for C<sub>17</sub>H<sub>14</sub>F<sub>3</sub>NO<sub>6</sub>S [M+H]<sup>+</sup> 418.0567, found 418.0565.

## 9. References

- 1 (a) H. J. Tang, L. Z. Lin, C. Feng and T. P. Loh, Palladium-Catalyzed Fluoroarylation of gem-Difluoroalkenes, *Angew. Chem., Int. Ed.*, 2017, **56**, 9872-9876; (b) J. Liu, J. Yang, F. Ferretti, R. Jackstell and M. Beller, Pd-Catalyzed Selective Carbonylation of gem-Difluoroalkenes: A Practical Synthesis of Difluoromethylated Esters, *Angew. Chem., Int. Ed.*, 2019, **58**, 4690-4694; (c). M. Zhou, J. Zhang, X. G. Zhang and X. Zhang, Ni-Catalyzed Defluorination for the Synthesis of gem-Difluoro-1,3-dienes and Their [4 + 2] Cycloaddition Reaction, *Org. Lett.* 2019, **21**, 671-674; (d) P. Tian, C. Q. Wang, S. H. Cai, S. Song, L. Ye, C. Feng and T. P. Loh, F-Nucleophilic-Addition-Induced Allylic Alkylation, *J. Am. Chem. Soc.*, 2016, **138**, 15869-15872; (e) H. Liu, L. Ge, D. X. Wang, N. Chen and C. Feng, Photoredox-Coupled F-Nucleophilic Addition: Allylation of gem-Difluoroalkenes, *Angew. Chem., Int. Ed.*, 2019, **58**, 3918-3922.
- 2 G. Liang, M. Liu, J. Chen, J. Ding, W. Gao and H. Wu, NBS-Promoted Sulfenylation of Sulfinates with Disulfides Leading to Unsymmetrical or Symmetrical Thiosulfonates, *Chin. J. Chem.*, 2012, **30**, 1611-1616.
- 3 W. Wang, X. Peng, F. Wei, C. H. Tung and Z. Xu, Copper(I)-Catalyzed Interrupted Click Reaction: Synthesis of Diverse 5-Hetero-Functionalized Triazoles, *Angew. Chem., Int. Ed.*, 2016, **55**, 649-653.
- 4 W. Wang, Y. Lin, Y. Ma, C. H. Tung and Z. Xu, Copper(I)-Catalyzed Three-Component Click/Persulfuration Cascade: Regioselective Synthesis of Triazole Disulfides, *Org. Lett.*, 2018, **20**, 2956-2959.
